# Supplementary material for: Flexible Implementation of the Trilinearity Constraint in Multivariate Curve Resolution Alternating Least Squares (MCR-ALS) of Chromatographic and Other Type of Data
Source: MDPI journal article supplement (doi:10.3390/molecules27072338), 2022-04-05
Supplement: s1 [file s1]

**Table S1.** Comparison of the multiple sample unfolded elution profiles obtained by ATLD, PARAFAC, PARAFAC2, MCR-ALS 1,1,0, MCR-ALS 2,2,0, MCR-ALS 1,1,1, MCR-ALS 0,0,0, with that of MCR-ALS 2,2,1 in the analysis of the wine dataset. See Equations 9-10 for the meaning of  $r^2$  and angle. See end of section 2.2 for the meaning of the different MCR-ALS variants

|               |                      | $r^2$  | Angle |
|---------------|----------------------|--------|-------|
| ATLD          | 3-hydroxy-2-butanone | 0.9100 | 24.4  |
|               | hexyl acetate        | 0.9186 | 23.3  |
|               | Background           | 0.9996 | 1.6   |
| PARAFAC       | 3-hydroxy-2-butanone | 0.9364 | 20.5  |
|               | hexyl acetate        | 0.9116 | 24.2  |
|               | Background           | 0.9996 | 1.52  |
| PARAFAC2      | 3-hydroxy-2-butanone | 0.9884 | 8.8   |
|               | hexyl acetate        | 0.9914 | 7.5   |
|               | Background           | 0.9996 | 1.7   |
| DNTD          | 3-hydroxy-2-butanone | 0.9829 | 10.6  |
|               | hexyl acetate        | 0.9857 | 9.7   |
|               | Background           | 0.9996 | 1.7   |
| MCR-ALS 1,1,0 | 3-hydroxy-2-butanone | 0.9250 | 22.3  |
|               | hexyl acetate        | 0.9252 | 22.3  |
|               | Background           | 0.9680 | 14.5  |
| MCR-ALS 2,2,0 | 3-hydroxy-2-butanone | 1.0000 | 0.2   |
|               | hexyl acetate        | 1.0000 | 0.2   |
|               | Background           | 0.9713 | 13.7  |
| MCR-ALS 1,1,1 | 3-hydroxy-2-butanone | 0.9252 | 22.3  |
|               | hexyl acetate        | 0.9256 | 22.2  |
|               | Background           | 0.9999 | 0.9   |
| MCR-ALS 0,0,0 | 3-hydroxy-2-butanone | 0.9932 | 6.7   |
|               | hexyl acetate        | 0.9916 | 7.4   |
|               | Background           | 0.9729 | 13.4  |
|               |                      |        |       |

**Table S2.** Comparison of results obtained by ATLD, PARAFAC, PARAFAC2, and different variants of MCR-ALS using 3 components in the analysis of the FIA dataset. In bold red worse recovered profiles with  $r^2$  values below 0.9. See Equations 7-10 for the meaning of  $R^2$ , lof,  $r^2$  and angle. See end of section 2.2 for the meaning of the different MCR-ALS variants

|                                                    | R <sup>2</sup> | lof  | Recovery of sample profiles |       |                |       |                |       |
|----------------------------------------------------|----------------|------|-----------------------------|-------|----------------|-------|----------------|-------|
|                                                    |                |      | 2HBA                        |       | 3HBA           |       | 4HBA           |       |
|                                                    |                |      | r <sup>2</sup>              | Angle | r <sup>2</sup> | Angle | r <sup>2</sup> | Angle |
| Three components model (one per chemical compound) |                |      |                             |       |                |       |                |       |
| ATLD                                               | 67.6           | 56.9 | 0.8633                      | 30.3  | 0.9927         | 6.9   | 0.9181         | 23.4  |
| PARAFAC                                            | 88.2           | 34.2 | 0.9382                      | 20.2  | 0.7137         | 44.5  | 0.7204         | 43.9  |
| PARAFAC2                                           | 99.9           | 0.8  | 0.8665                      | 29.9  | 0.9679         | 14.6  | 0.9354         | 20.7  |
| DNTD (with spectra shifting)                       | 99.9           | 3.6  | 0.9738                      | 13.2  | 0.9990         | 2.6   | 0.9993         | 2.2   |
| DNTD (with FIA profiles shifting)                  | 67.0           | 32.9 | 0.6521                      | 49.2  | 0.8706         | 29.4  | 0.9972         | 4.3   |
| MCR-ALS bilinear (0,0,0)                           | 97.0           | 17.4 | 0.8614                      | 30.5  | 0.8391         | 33.0  | 0.9766         | 12.4  |
| MCR-ALS trilinear (1,1,1)                          | 96.9           | 17.7 | 0.8683                      | 29.7  | 0.8138         | 35.5  | 0.9865         | 9.4   |
| MCR-ALS trilinear (2,2,2)                          | 96.3           | 19.2 | 0.8733                      | 29.1  | 0.8265         | 34.3  | 0.9853         | 9.8   |

## Supplementary Figures

- Figures S1-S8: ATLD, DNTD, PARAFAC, PARAFAC2 and MCR-ALS (different variants) results in the analysis of the wine GC-MS dataset
- Figures: S9-S14 ATLD, DNTD, PARAFAC and PARAFAC2 and MCR-ALS (different variants) results in the analysis of the FIA dataset using 6 components
- Figures: S15-S21 ATLD, DNTD, PARAFAC and PARAFAC2 and MCR-ALS (different variants) results in the analysis of the FIA dataset using 3 components

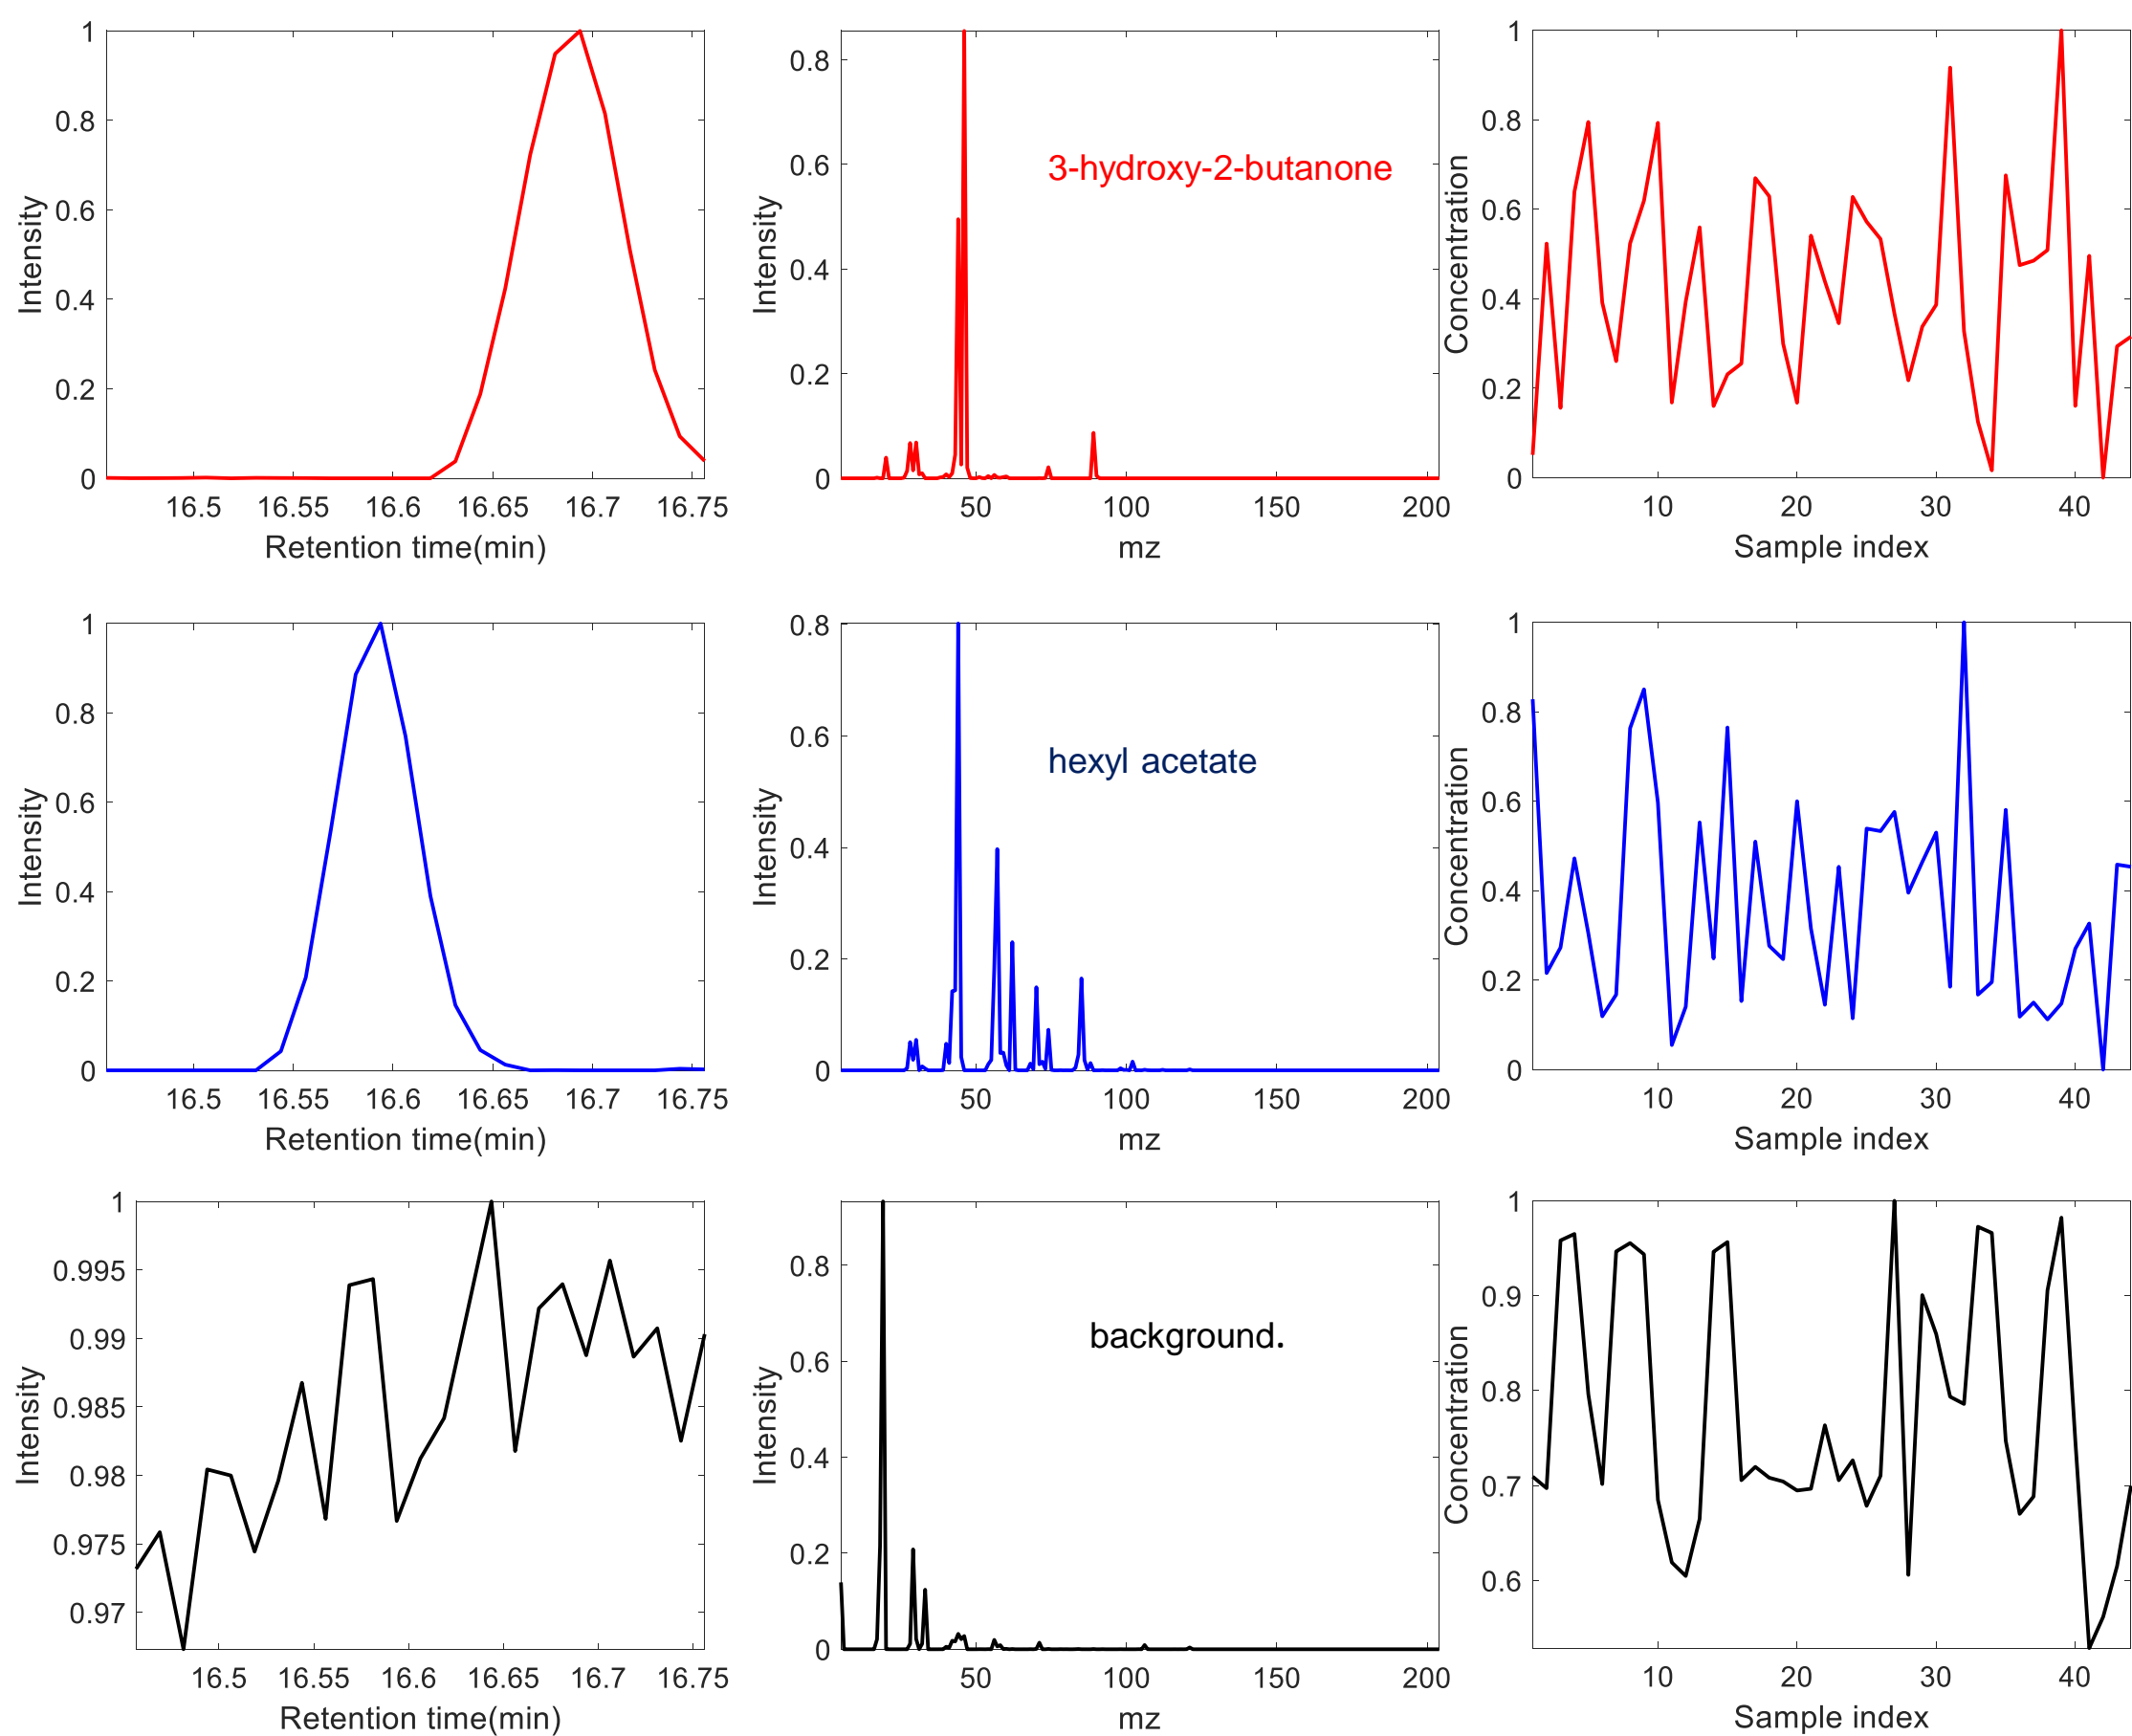

**Figure S1** Elution, spectra, and sample profiles of the three components resolved by **ATLD** in the analysis of the wine GC-MS dataset.

Figure S1

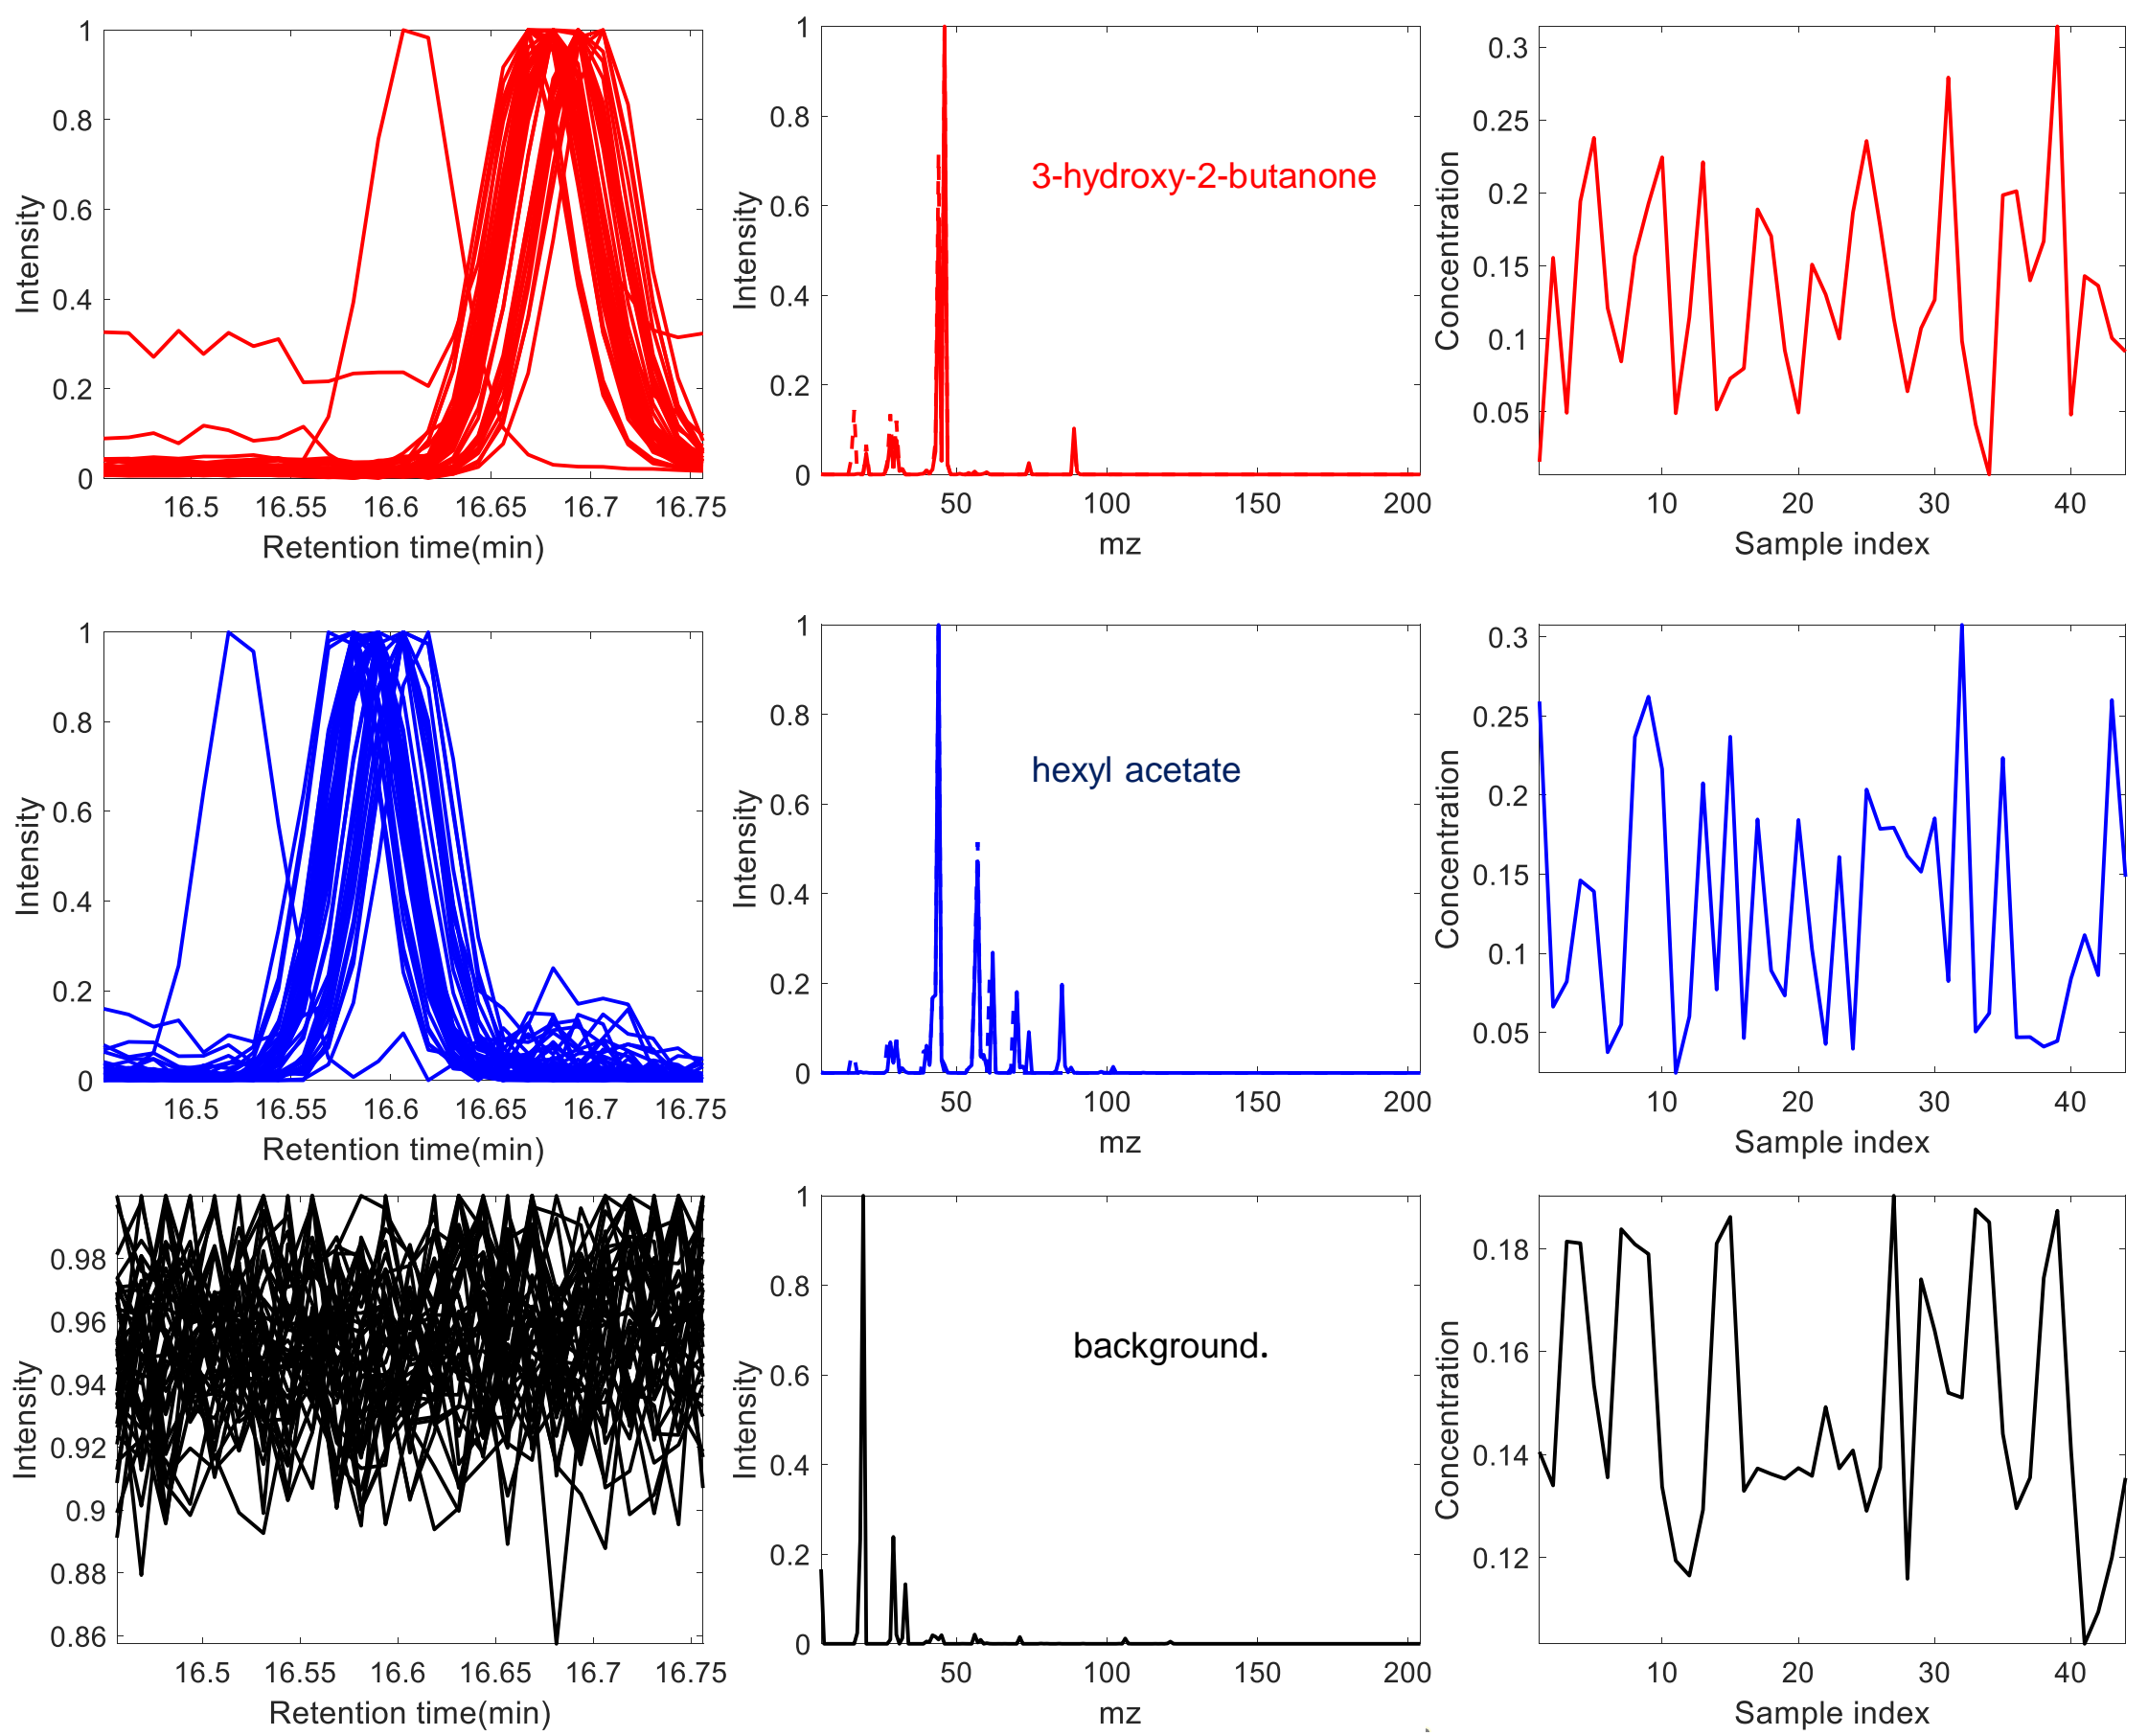

**Figure S2** Elution, spectra, and sample profiles of the three components resolved by **DNTD** in the analysis of the wine GC-MS dataset.

Figure S2

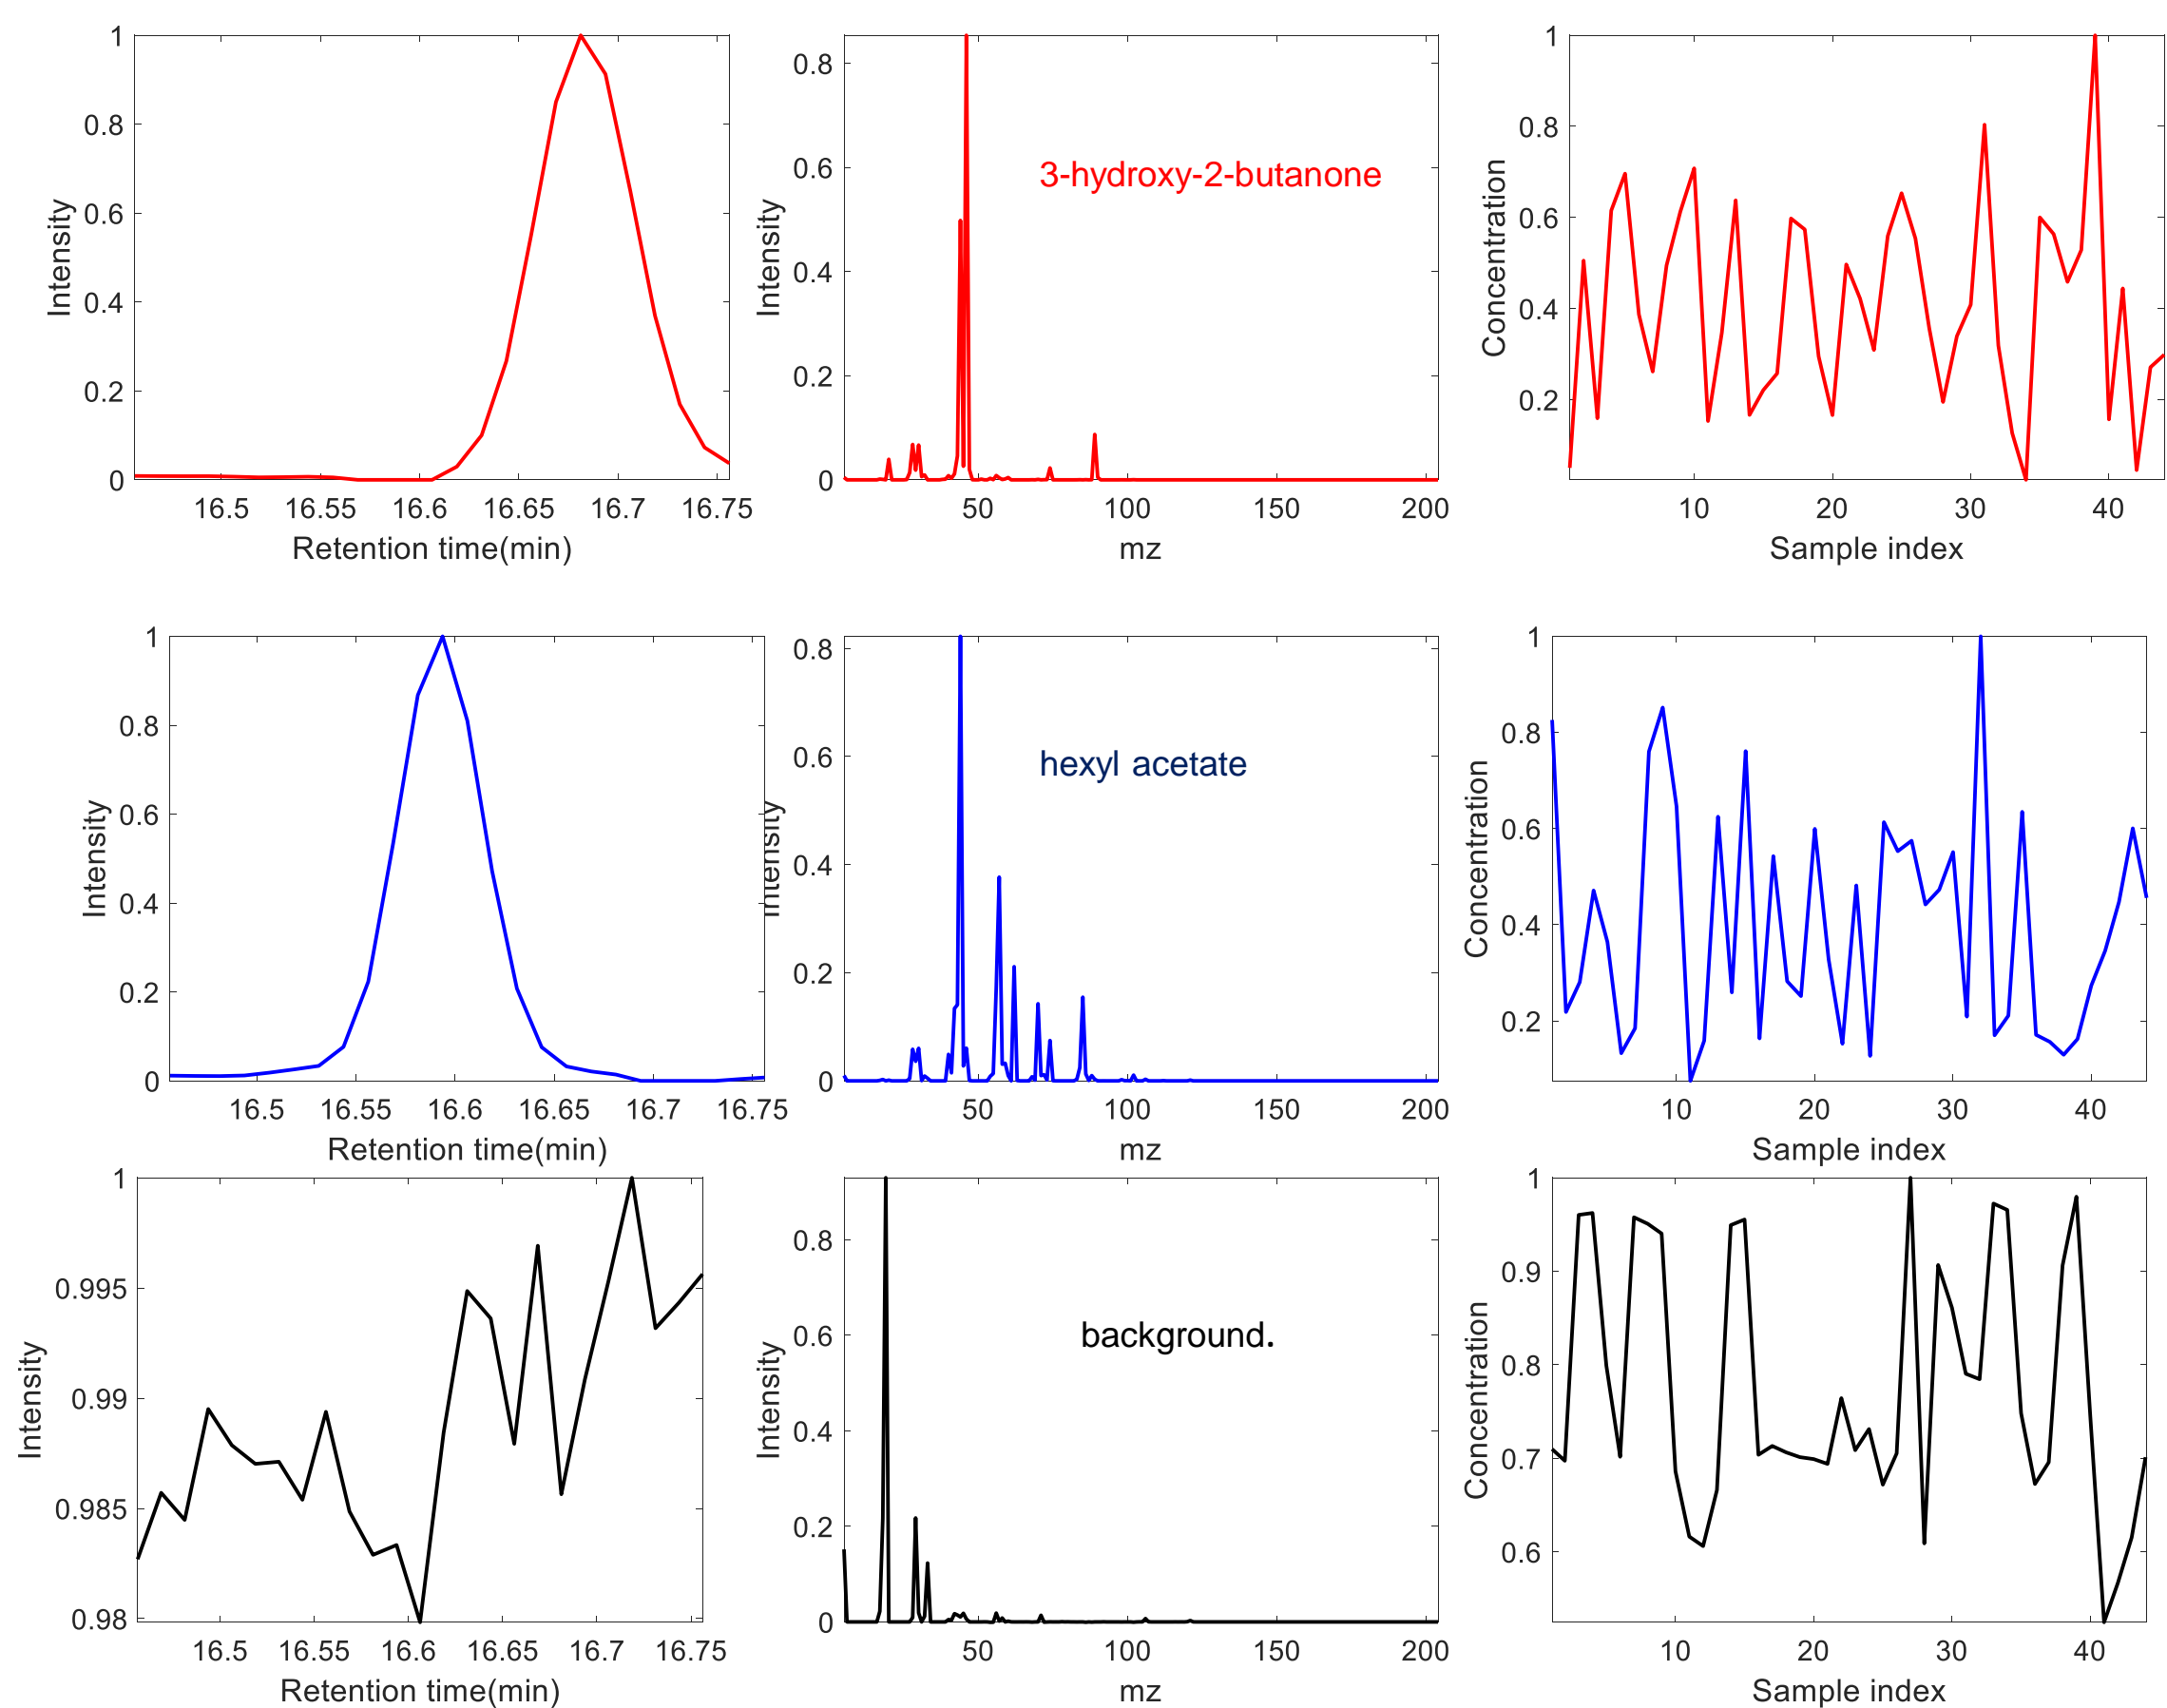

**Figure S3** Elution, spectra, and sample profiles of the three components resolved by **PARAFAC** in the analysis of the wine GC-MS dataset.

Figure S3

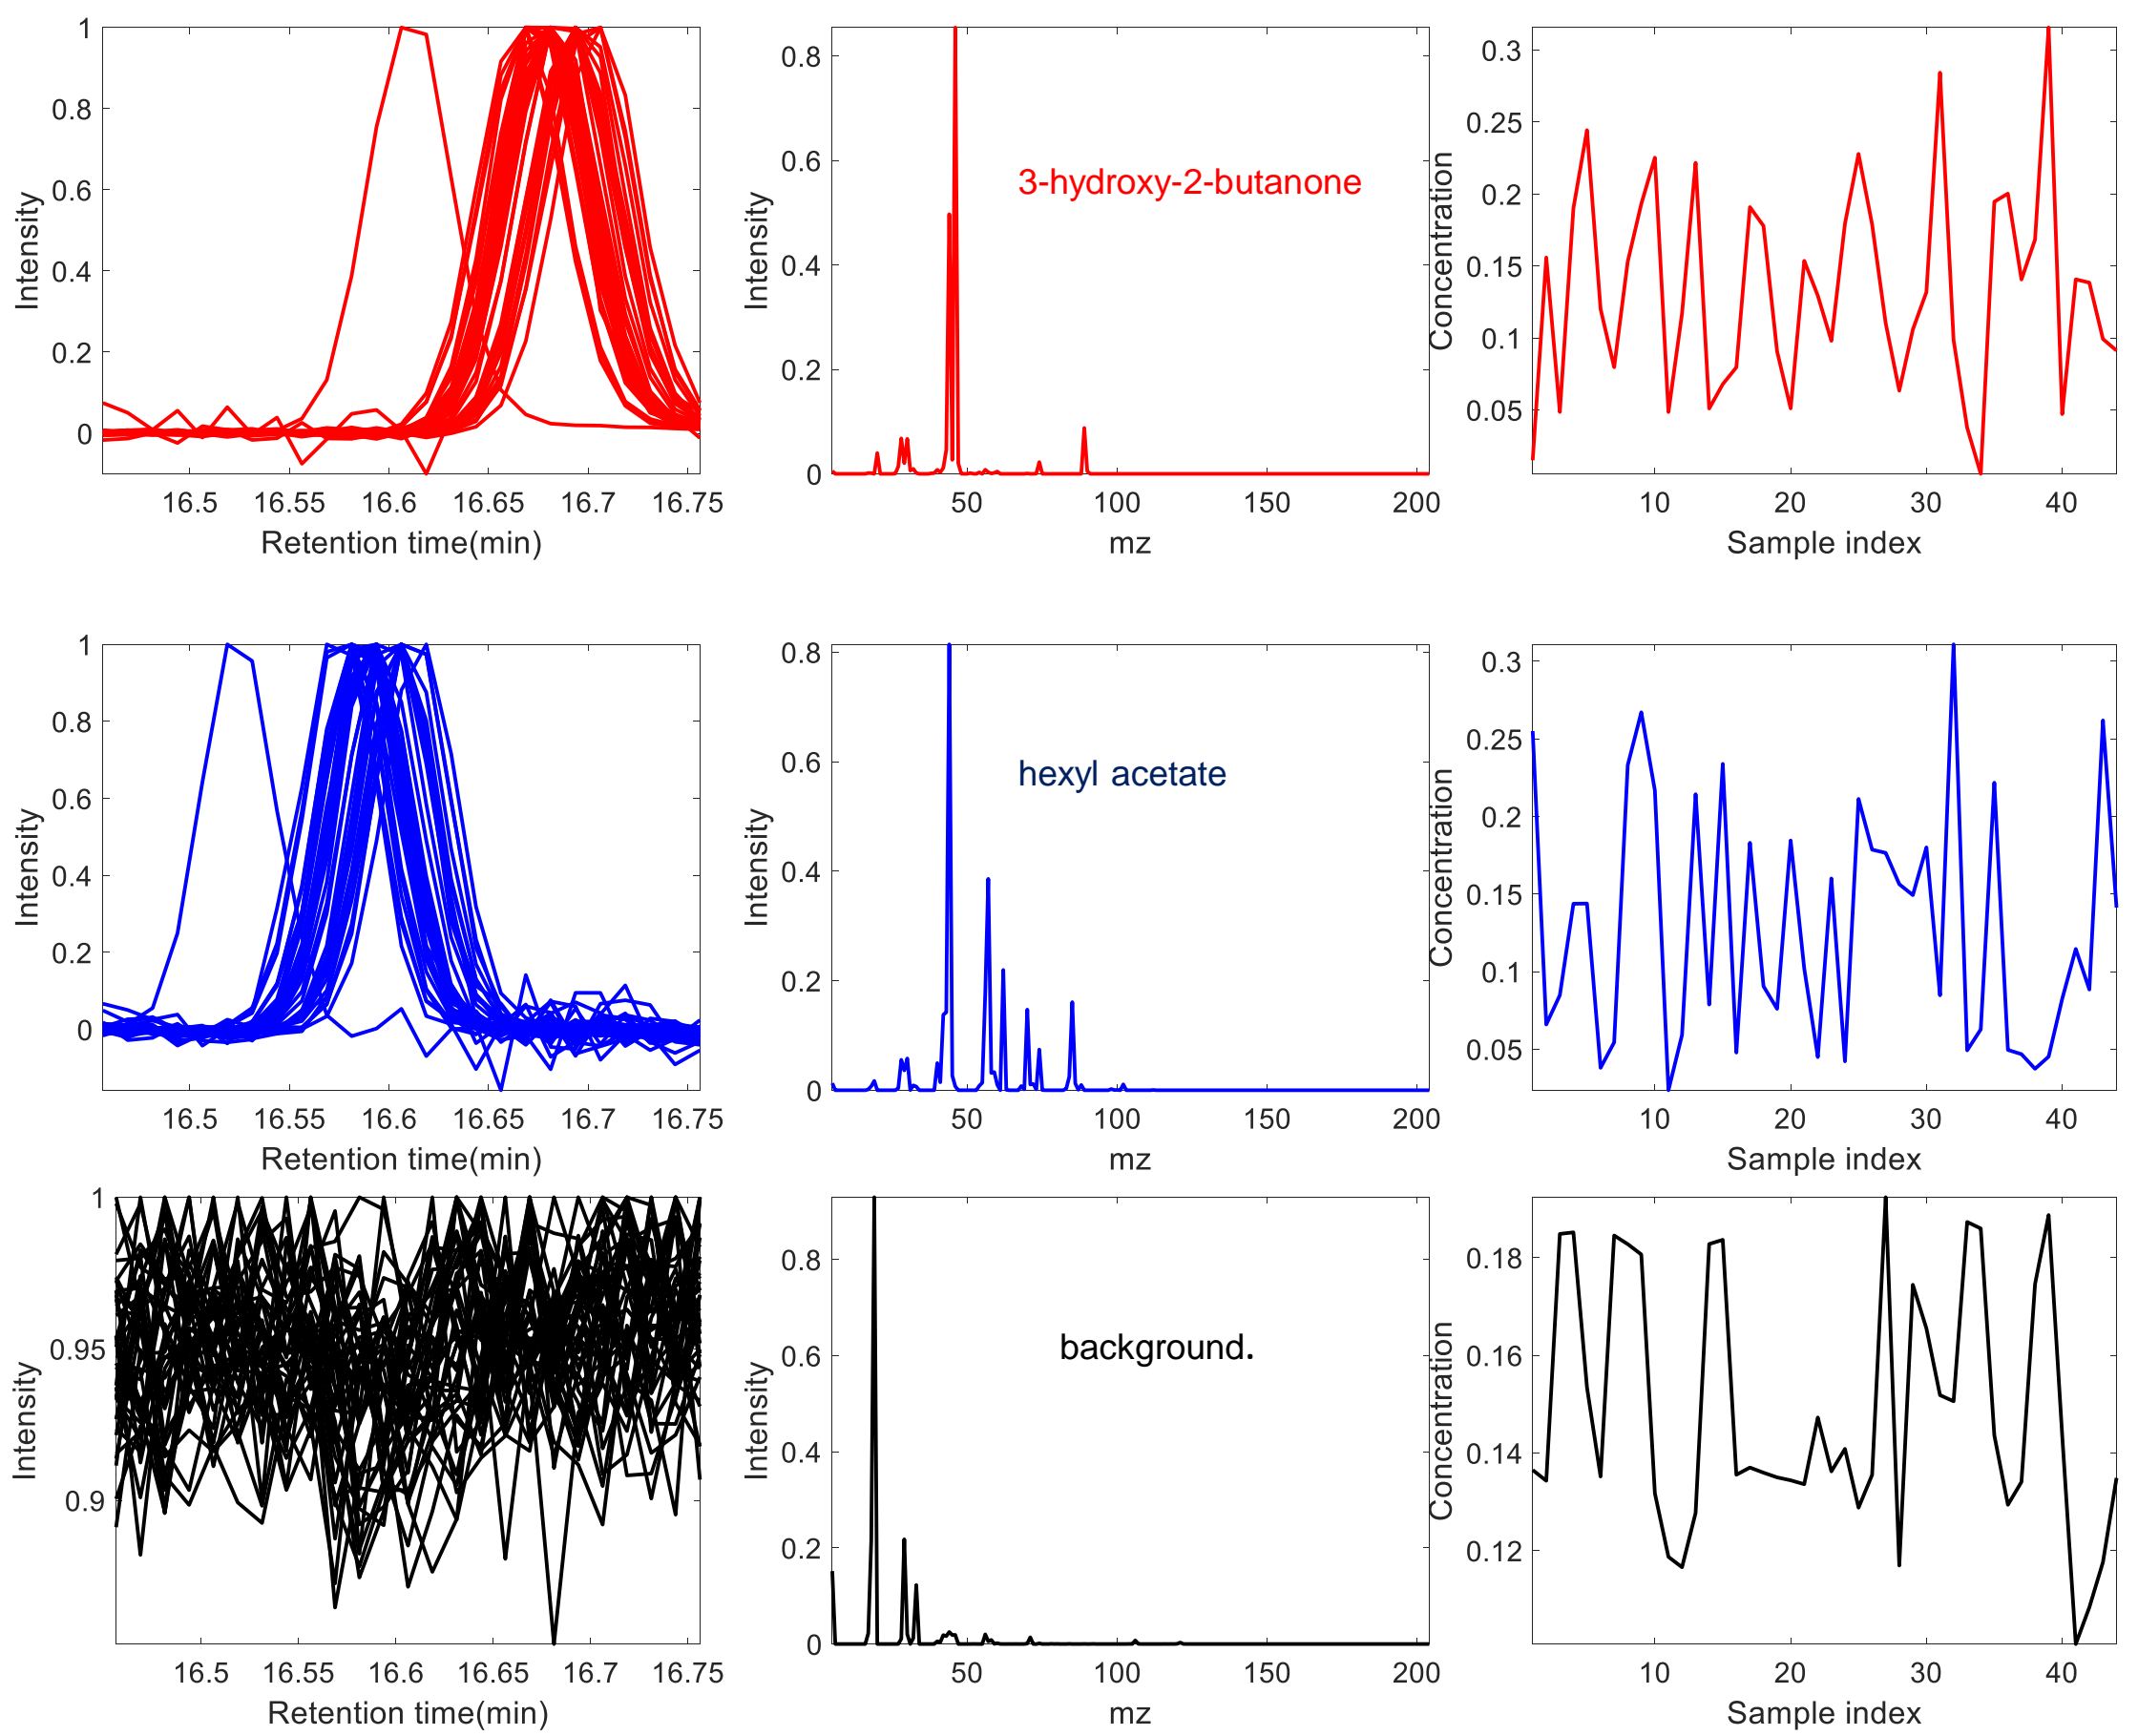

**Figure S4** Elution, spectra, and sample profiles of the three components resolved by **PARAFAC2** in the analysis of the wine GC-MS dataset.

Figure S4

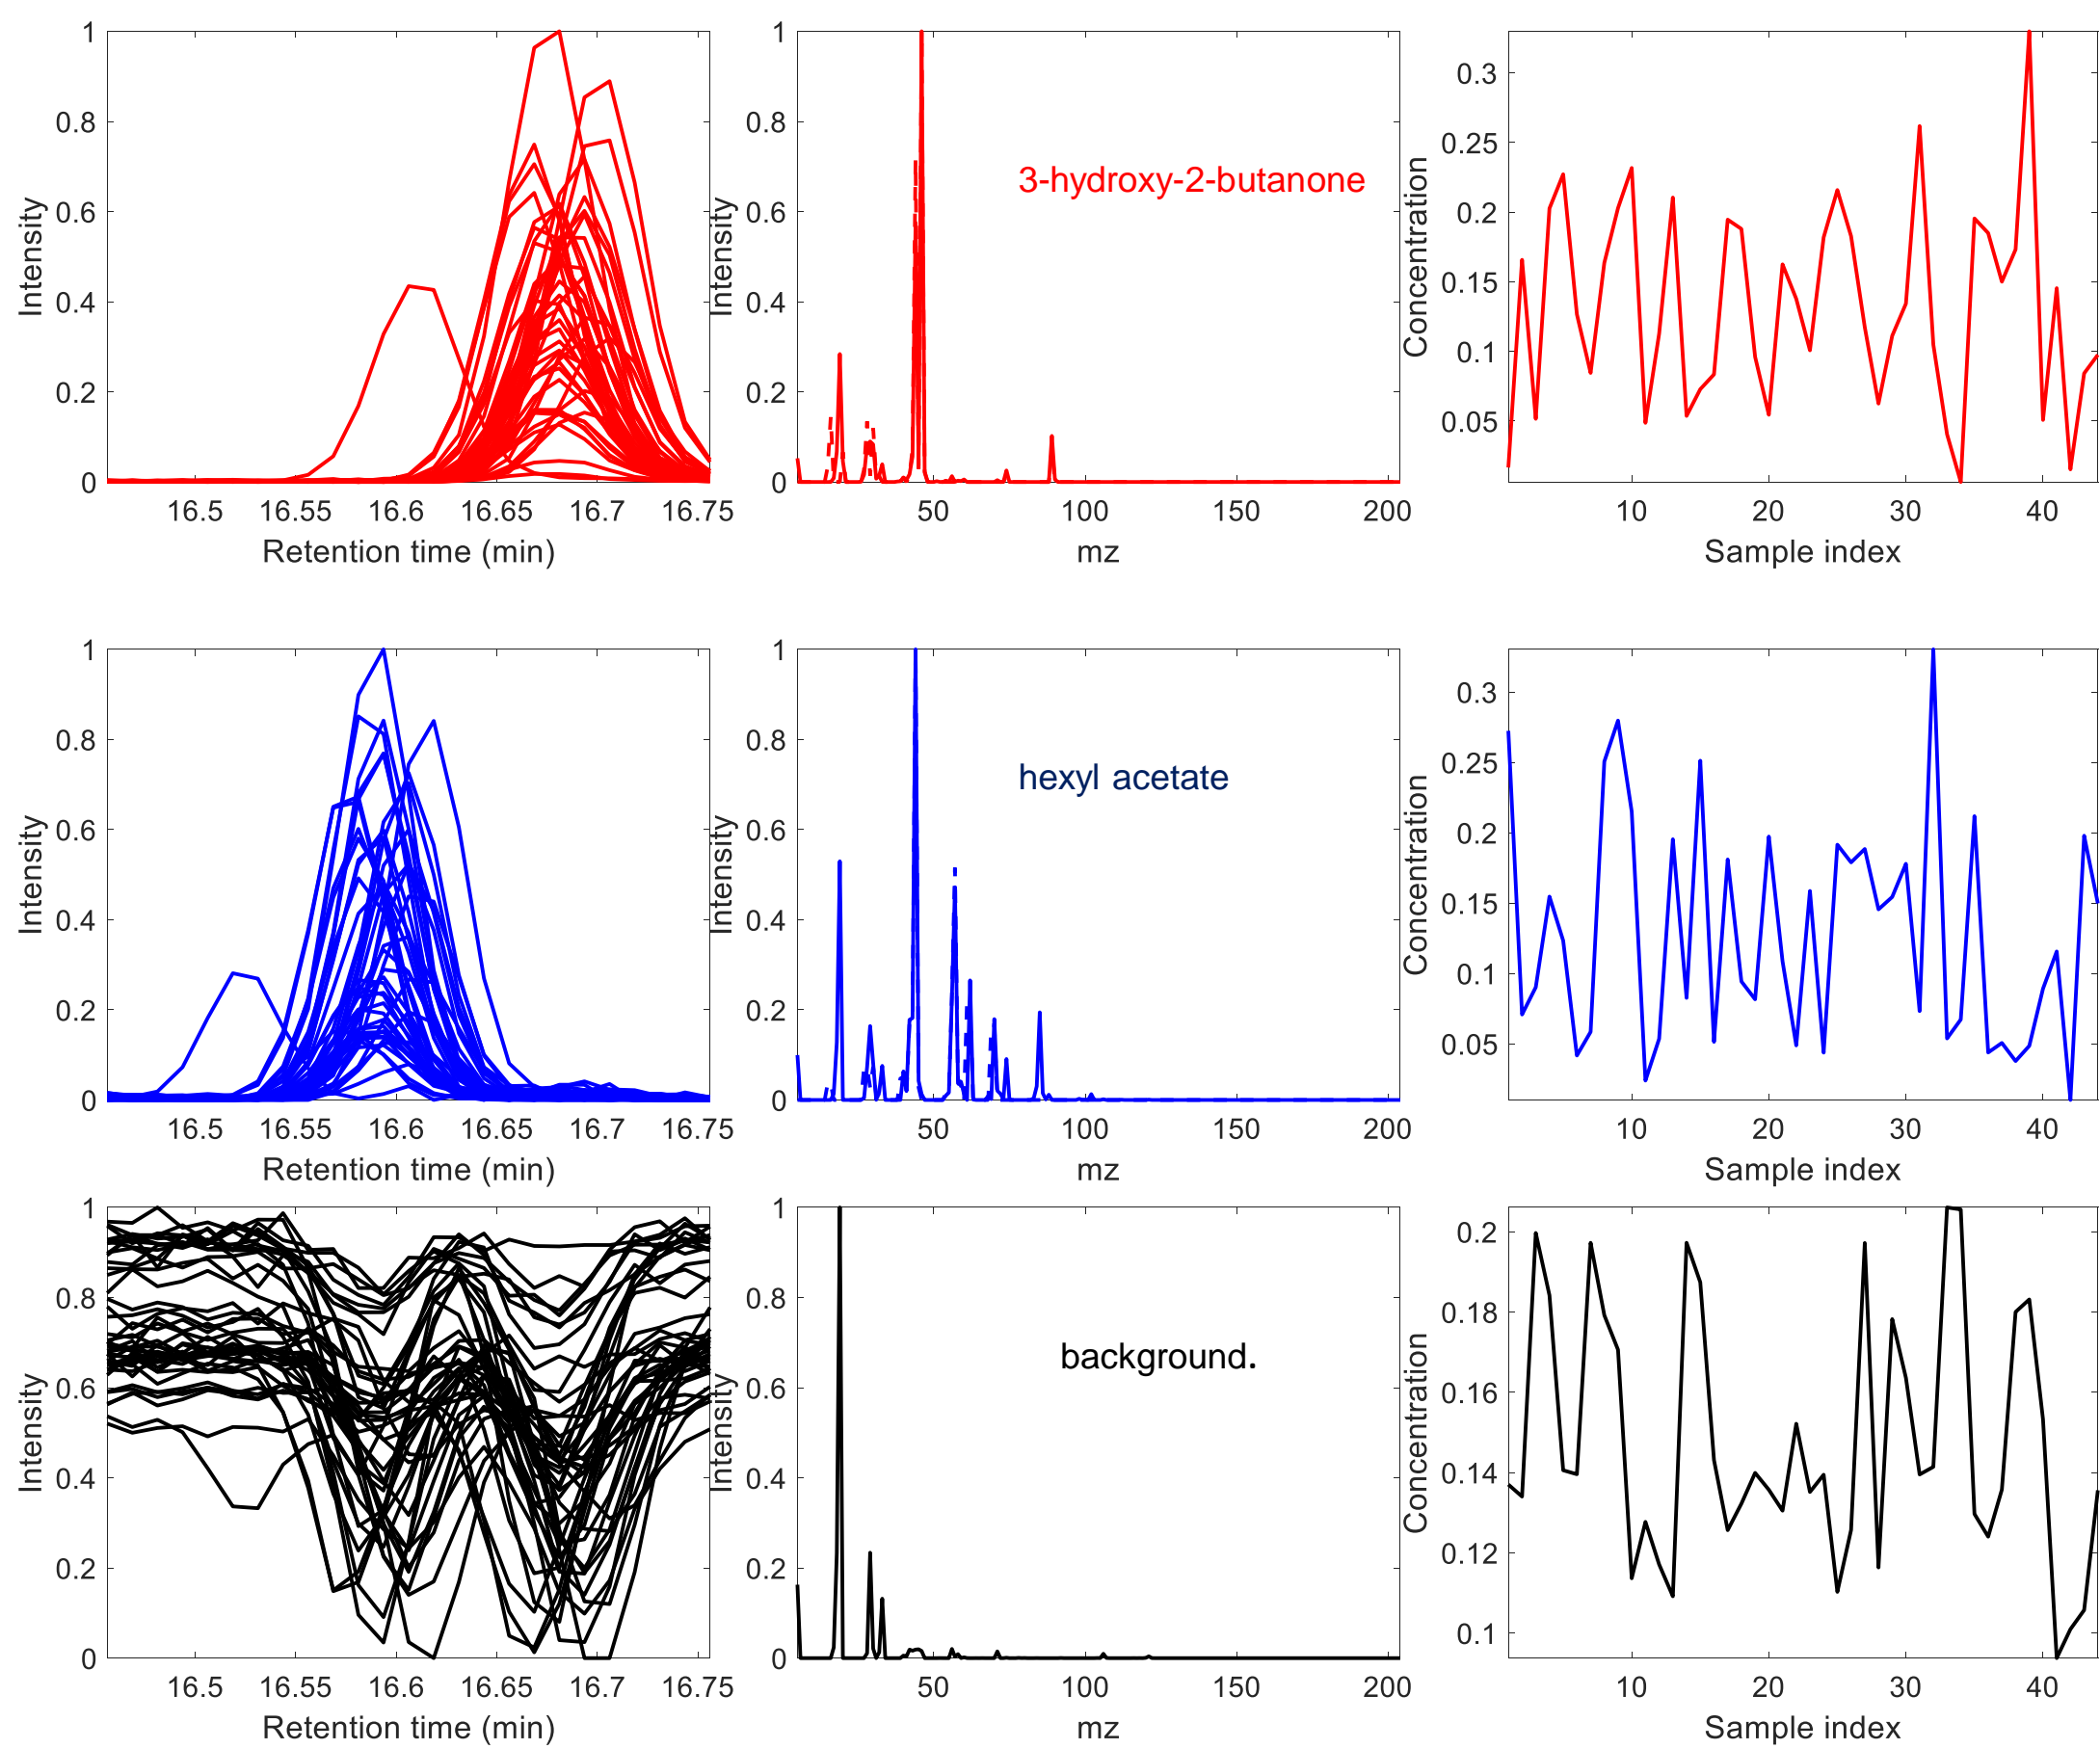

**Figure S5** Elution, spectra, and sample profiles of the three components resolved by **MCR-ALS bilinear (0,0,0)** in the analysis of the wine GC-MS dataset.

Figure S5



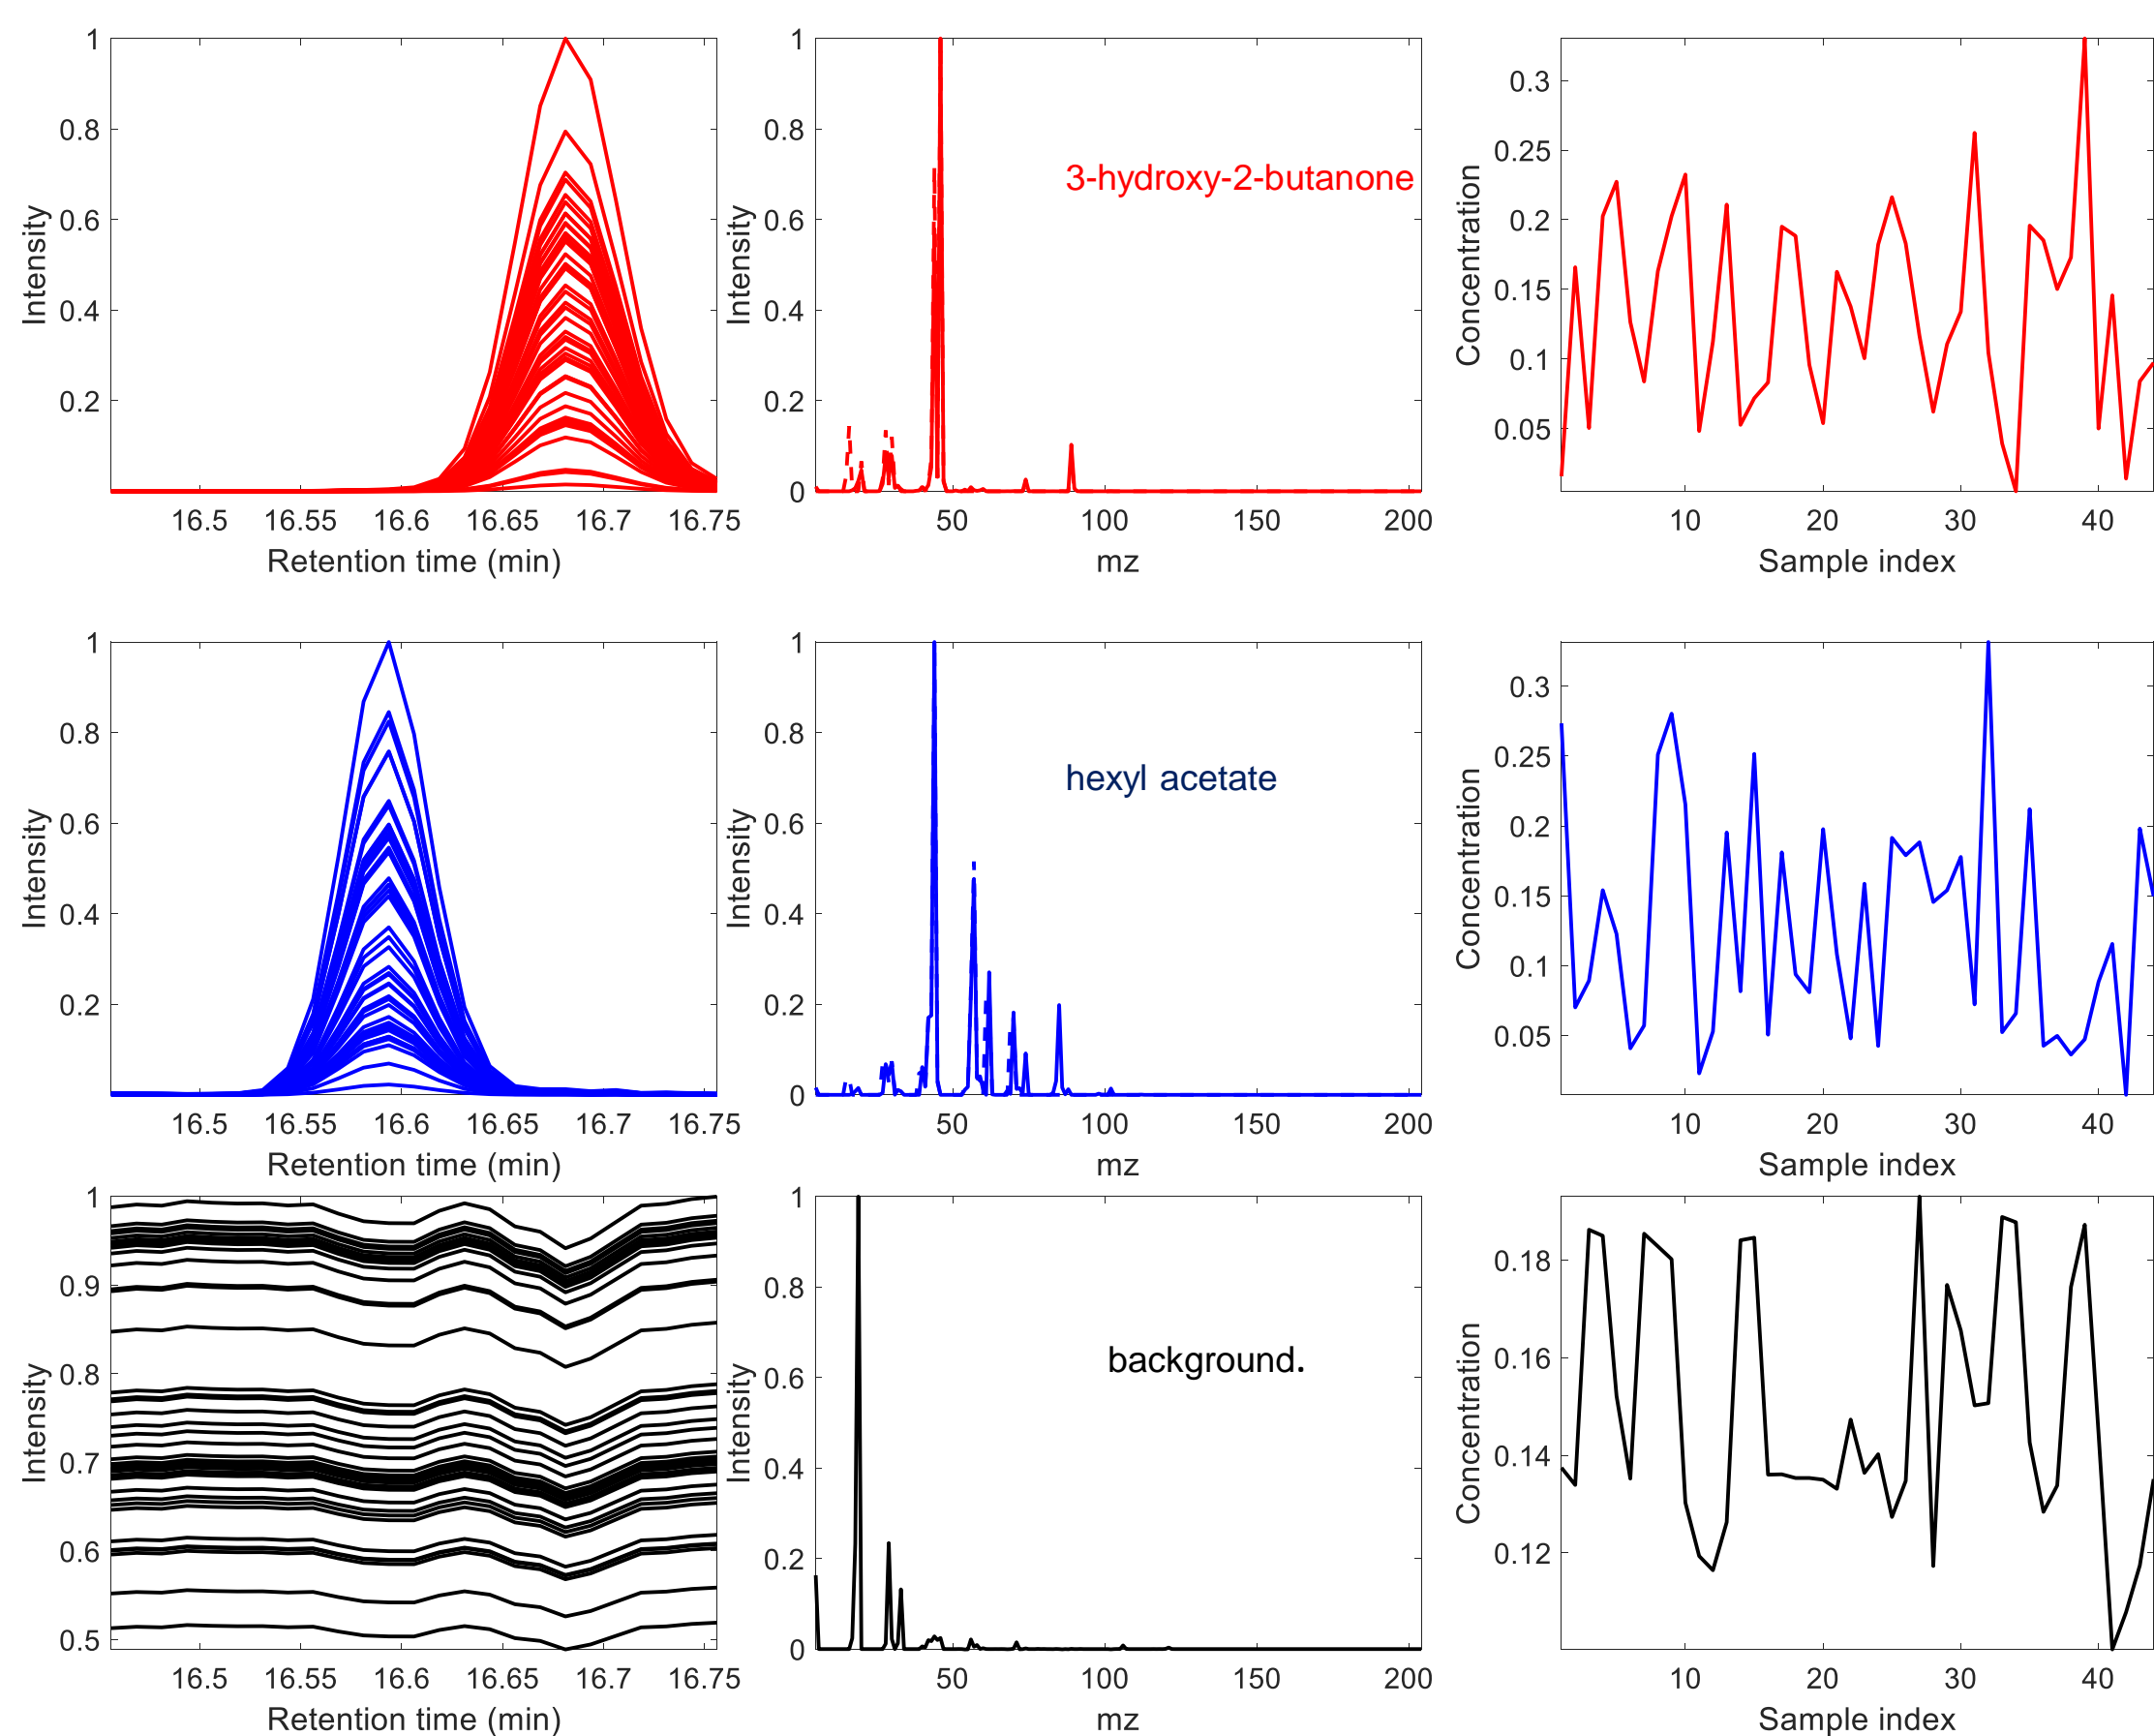

**Figure S6** Elution, spectra, and sample profiles of the three components resolved by **MCR-ALS trilinear (1,1,1)** in the analysis of the wine GC-MS dataset.

Figure S6

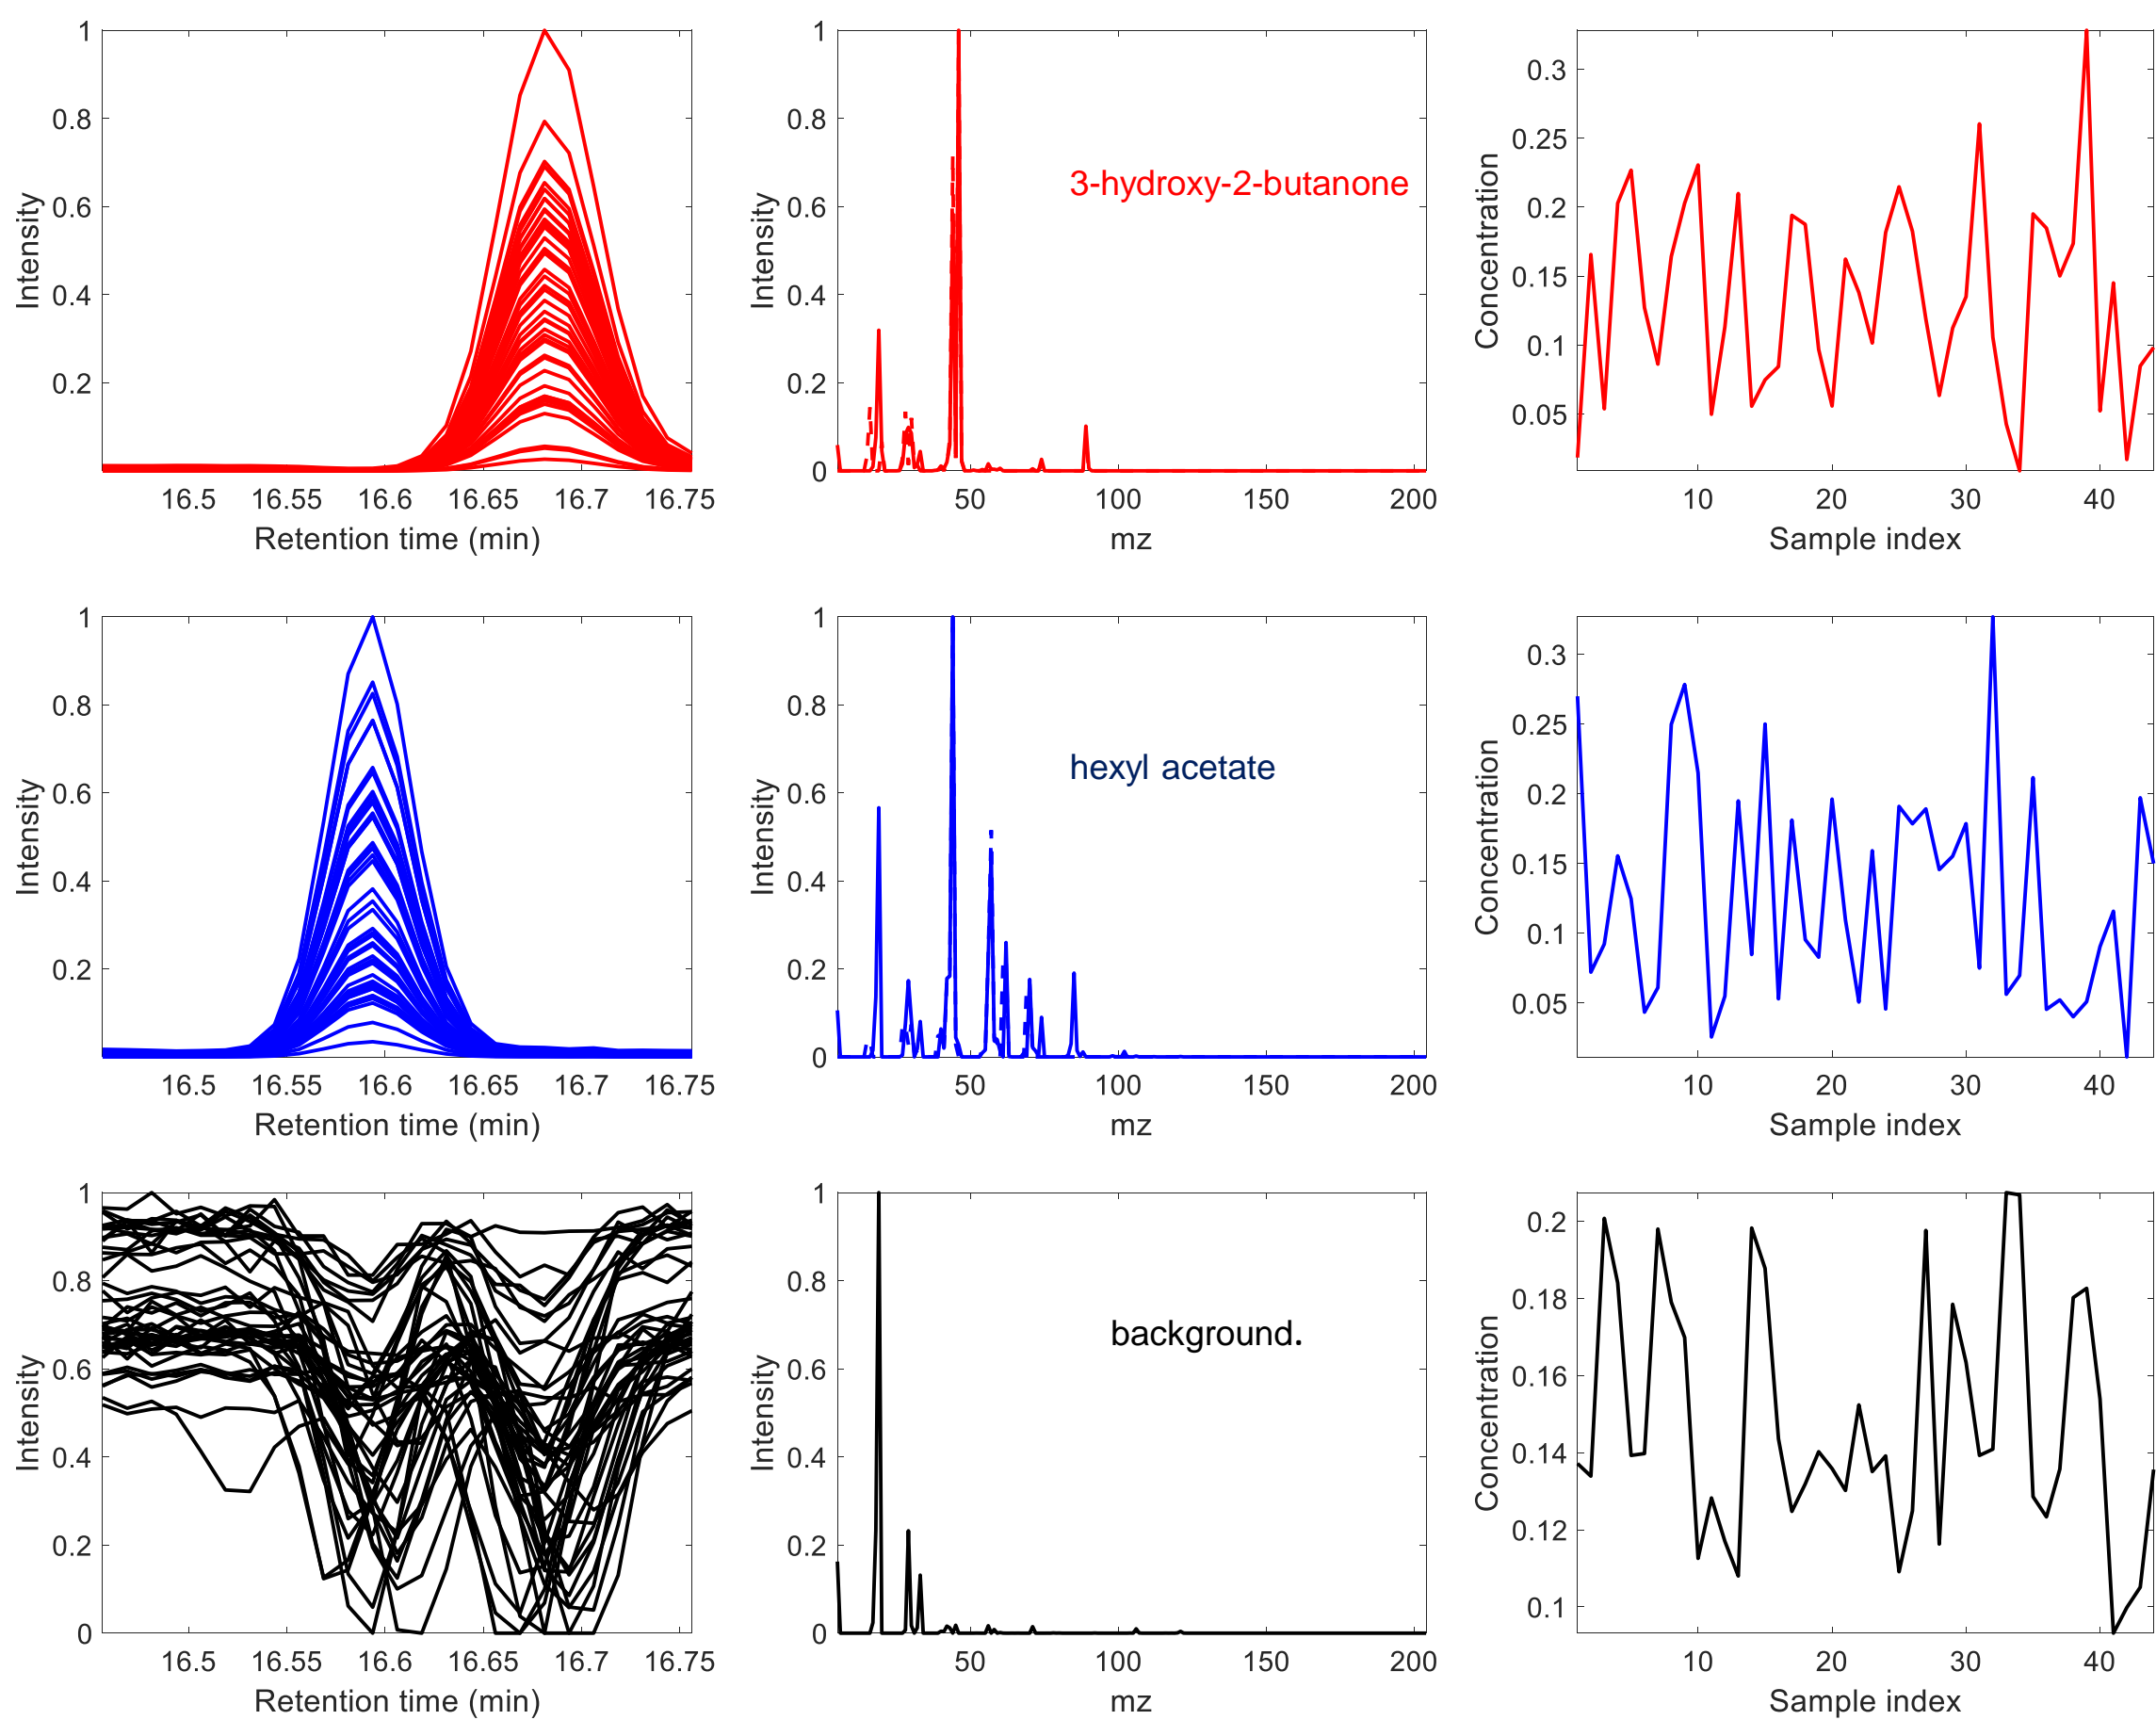

**Figure S7** Elution, spectra, and sample profiles of the three components resolved by **MCR-ALS trilinear (1,1,0)** in the analysis of the wine GC-MS dataset.

Figure S7

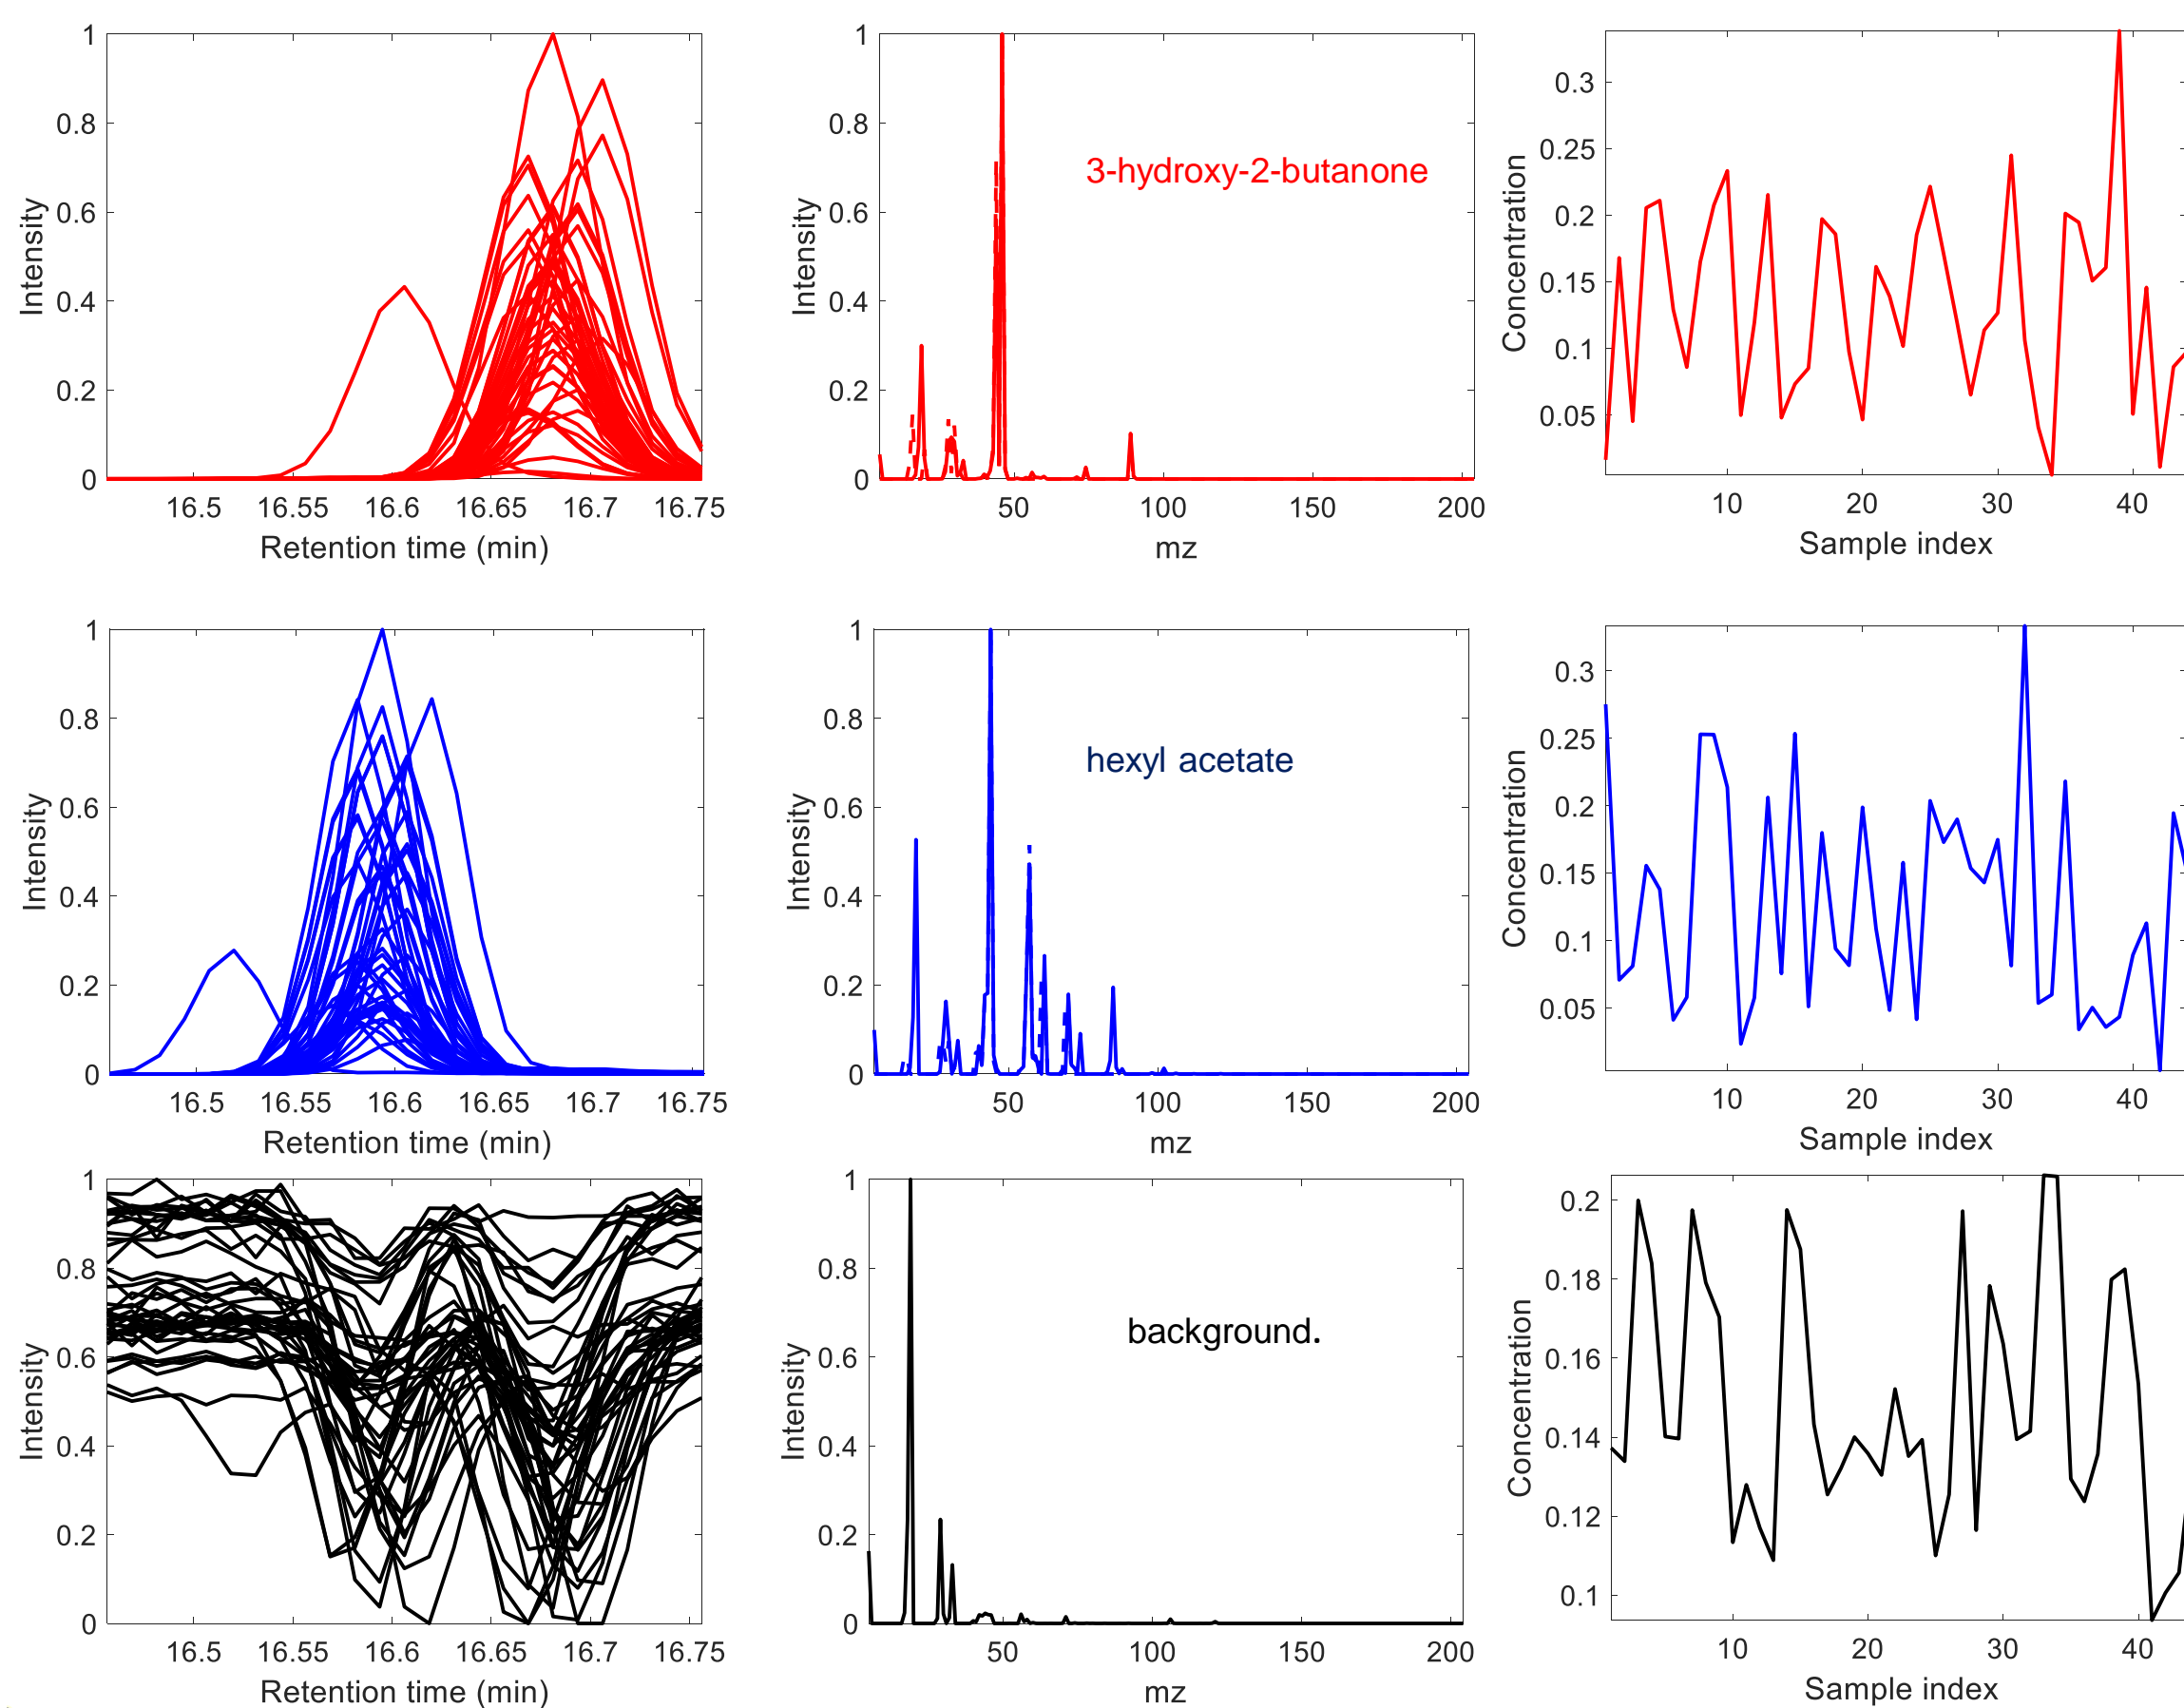

**Figure S8** Elution, spectra, and sample profiles of the three components resolved by **MCR-ALS trilinear (2,2,0)** in the analysis of the wine GC-MS dataset.

Figure S8

**2-HBA**

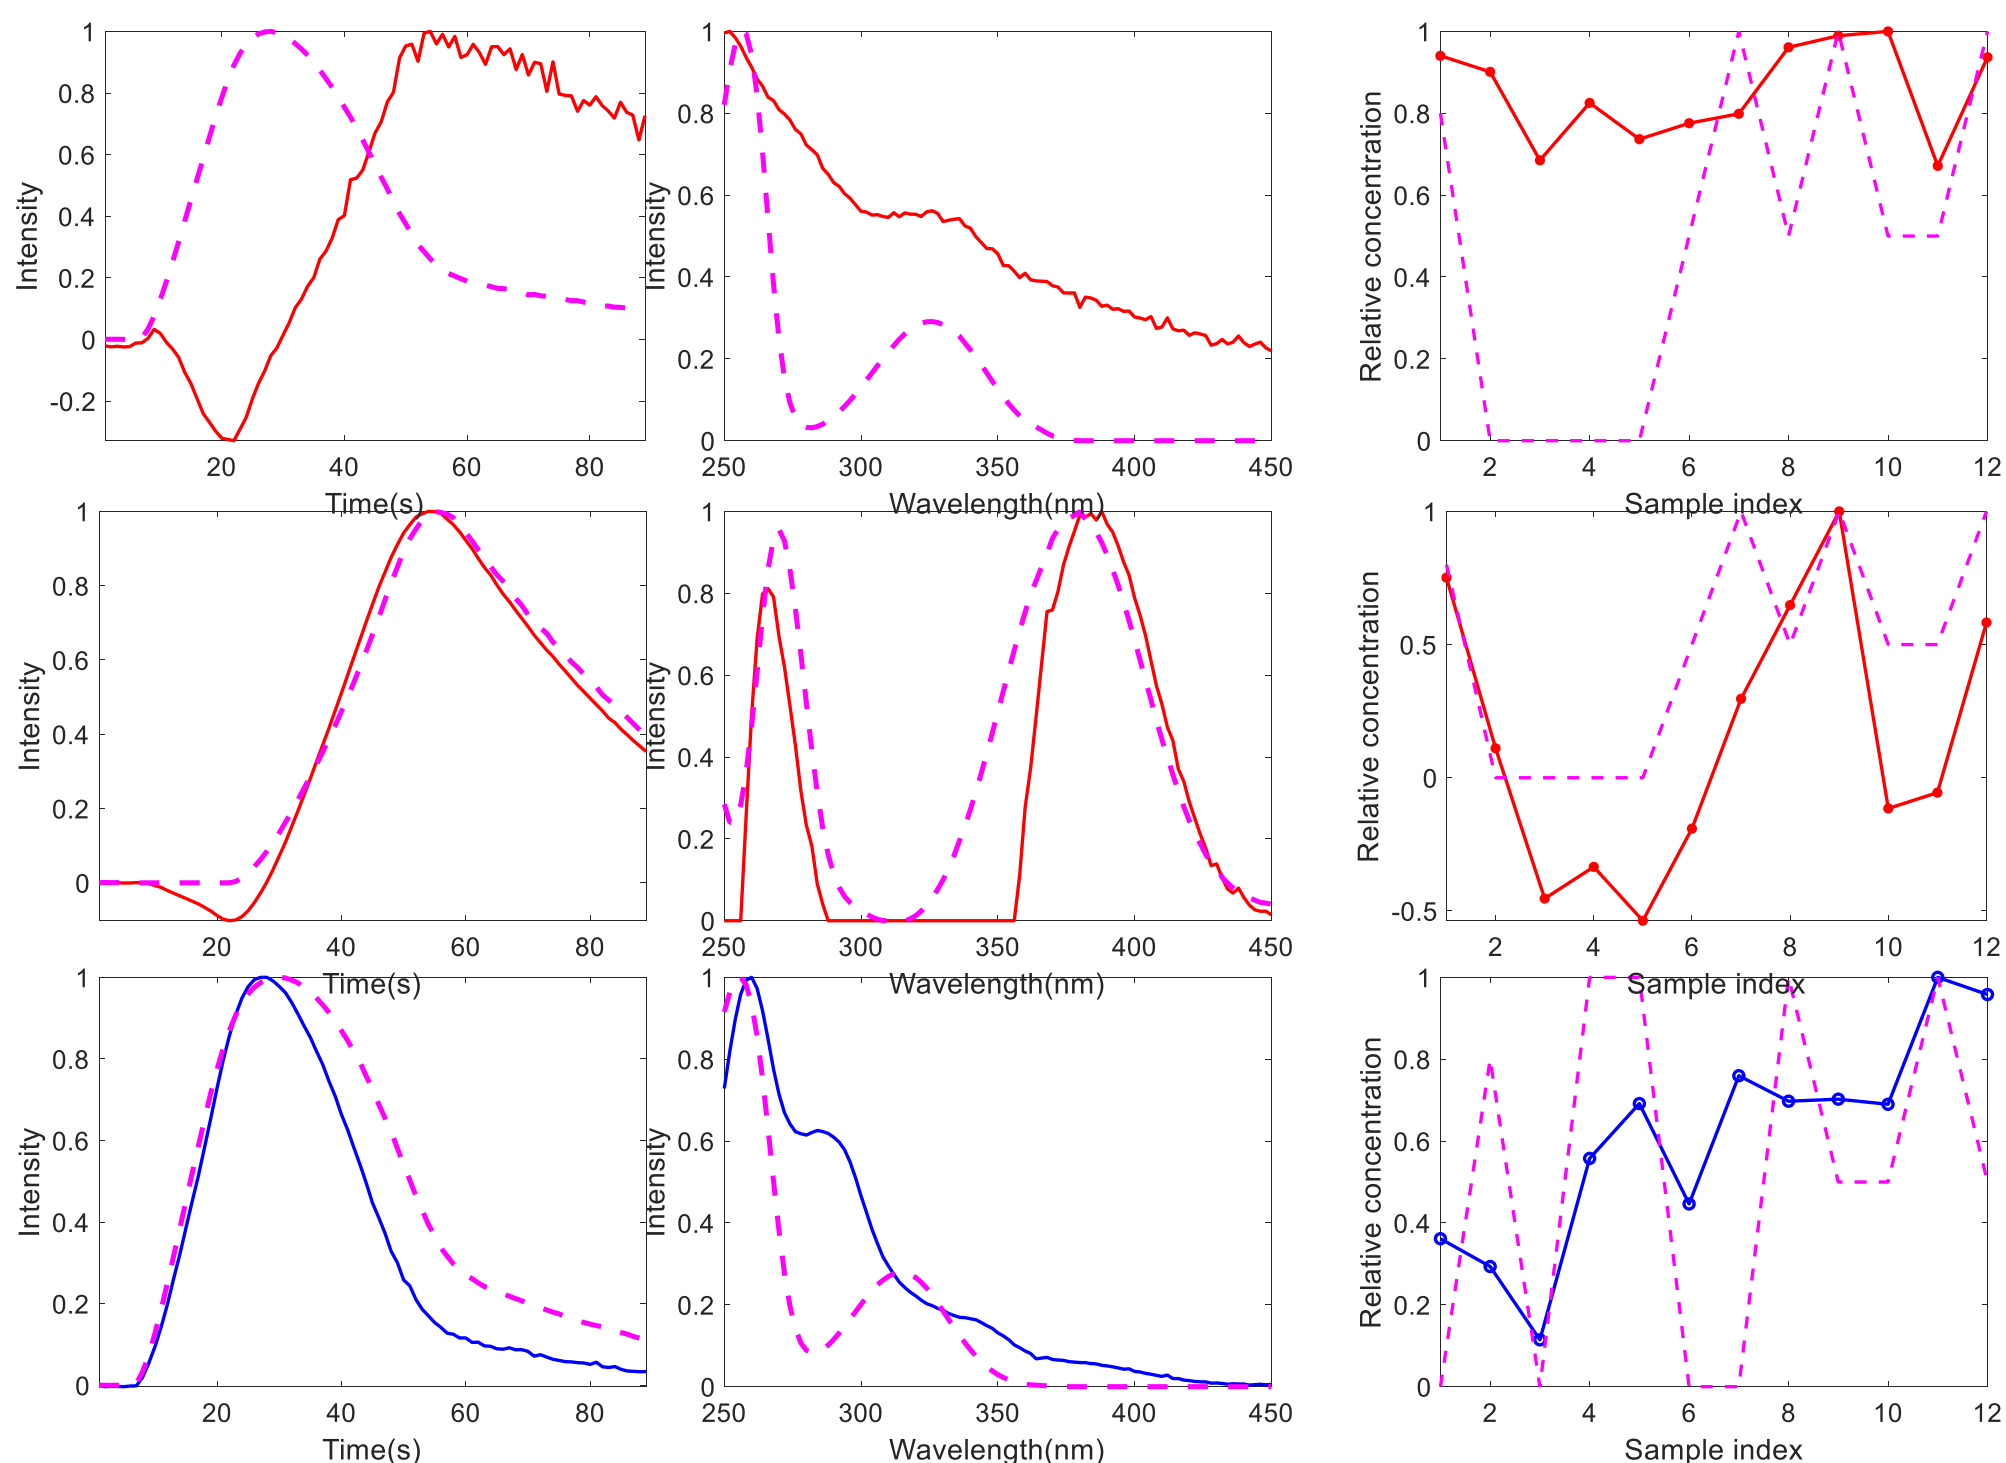

**3-HBA**

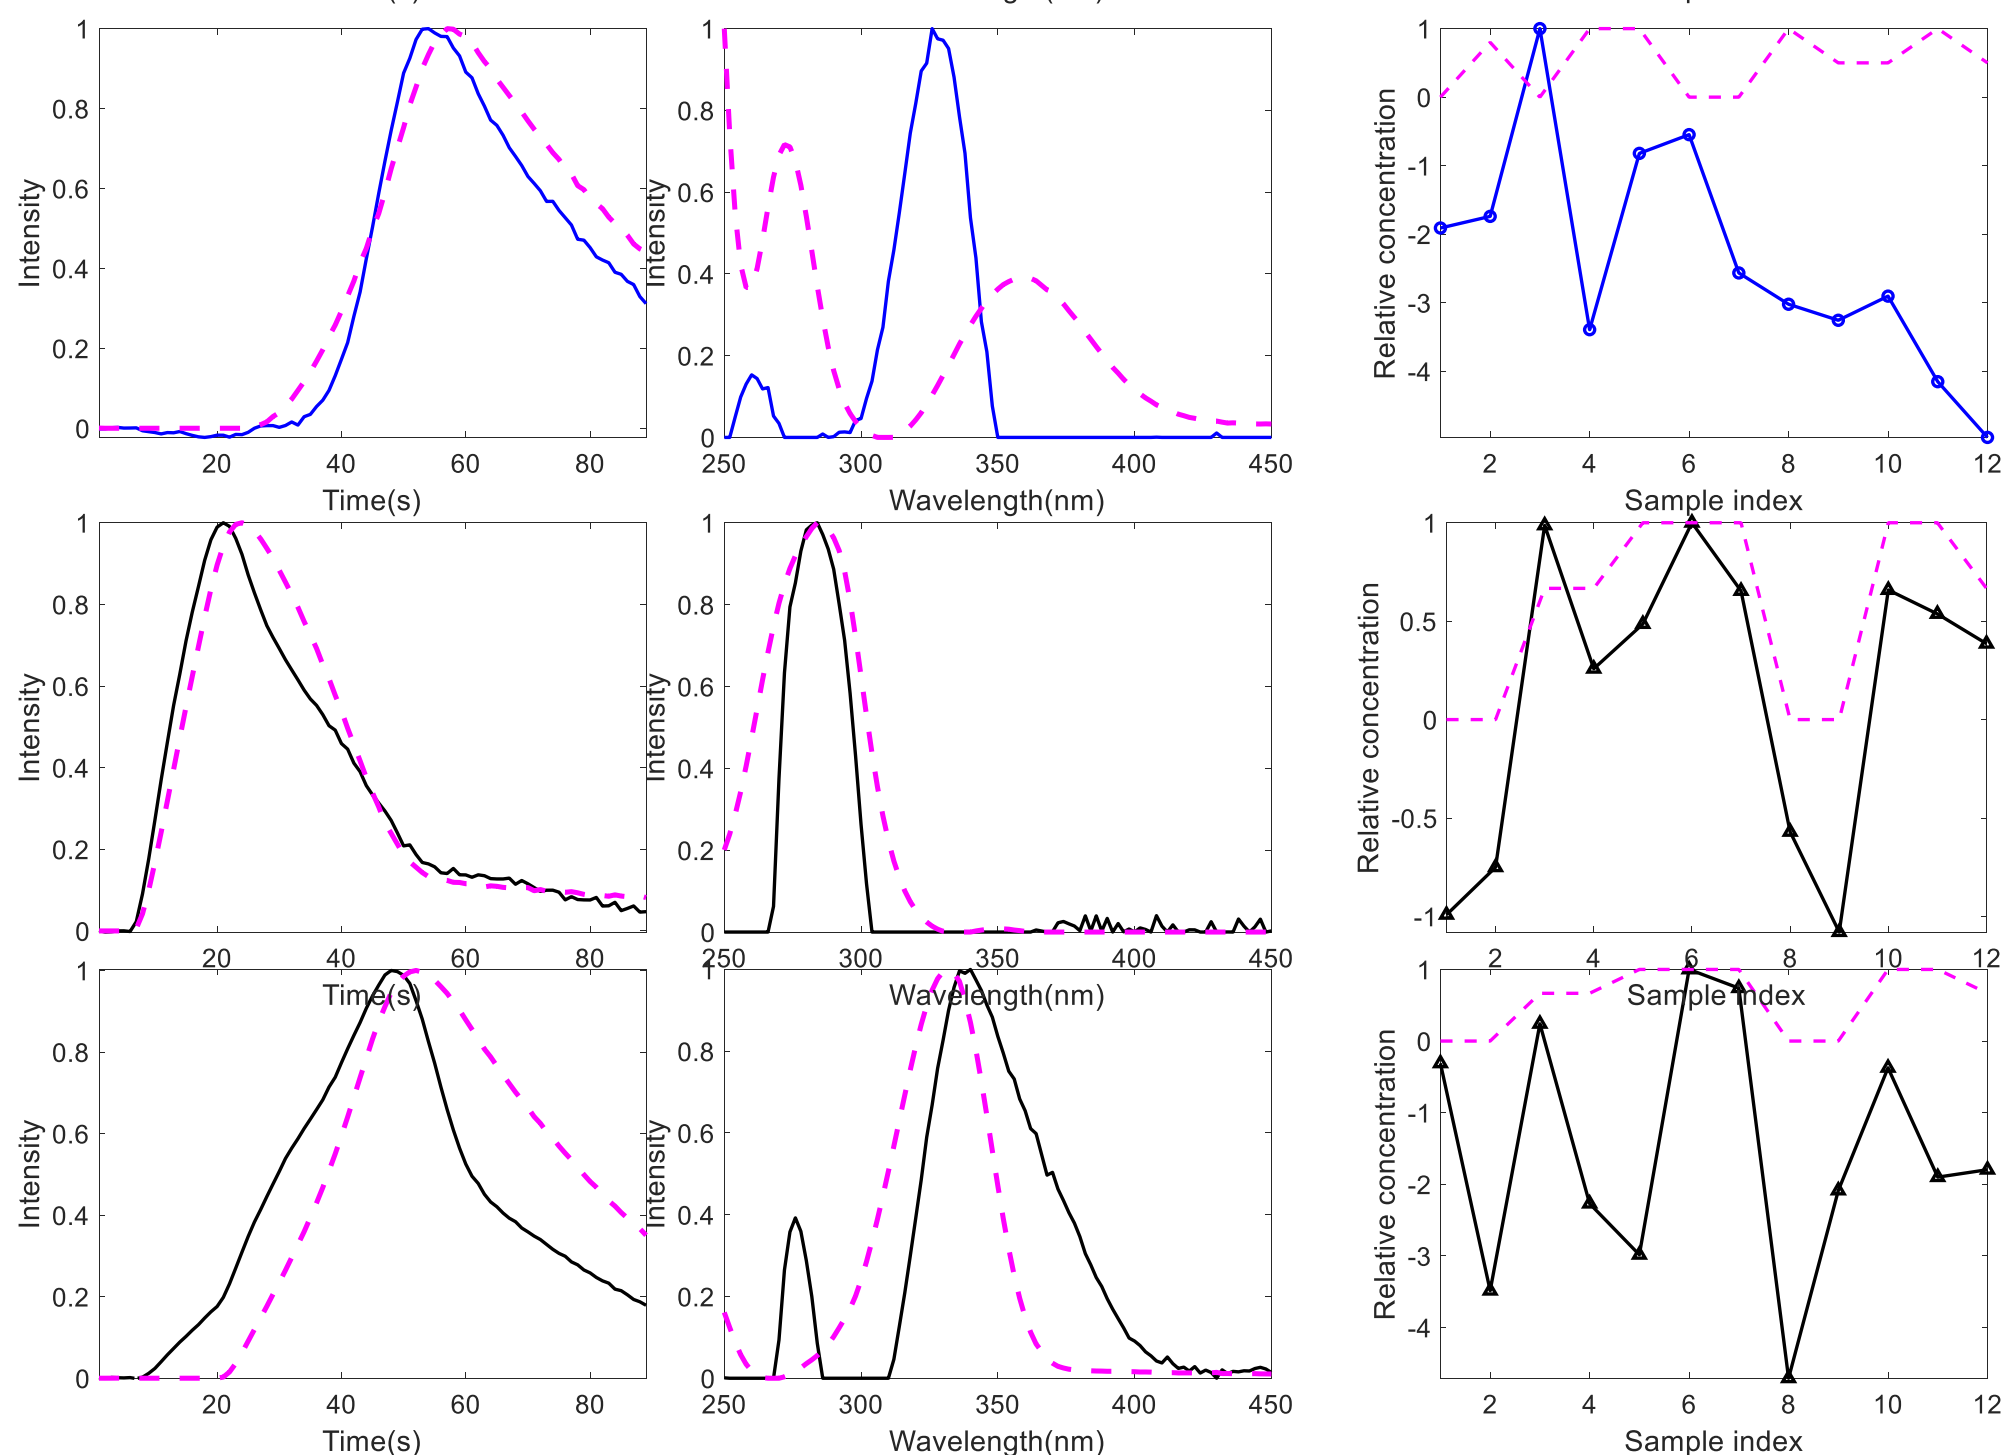

**4-HBA**

**Figure S9** FIA (left), spectra (middle), and sample (right) profiles of the six components resolved in the analysis of the pH gradient FIA-UV dataset by **ATLD**, corresponding to the two acid-base species of 2-HBA (red), 3-HBA (blue) and 4-HBA (black). Species spectra and sample profiles were compared with reference ones (cyan). See results in section 4.3 and Table 3.

**2-HBA**

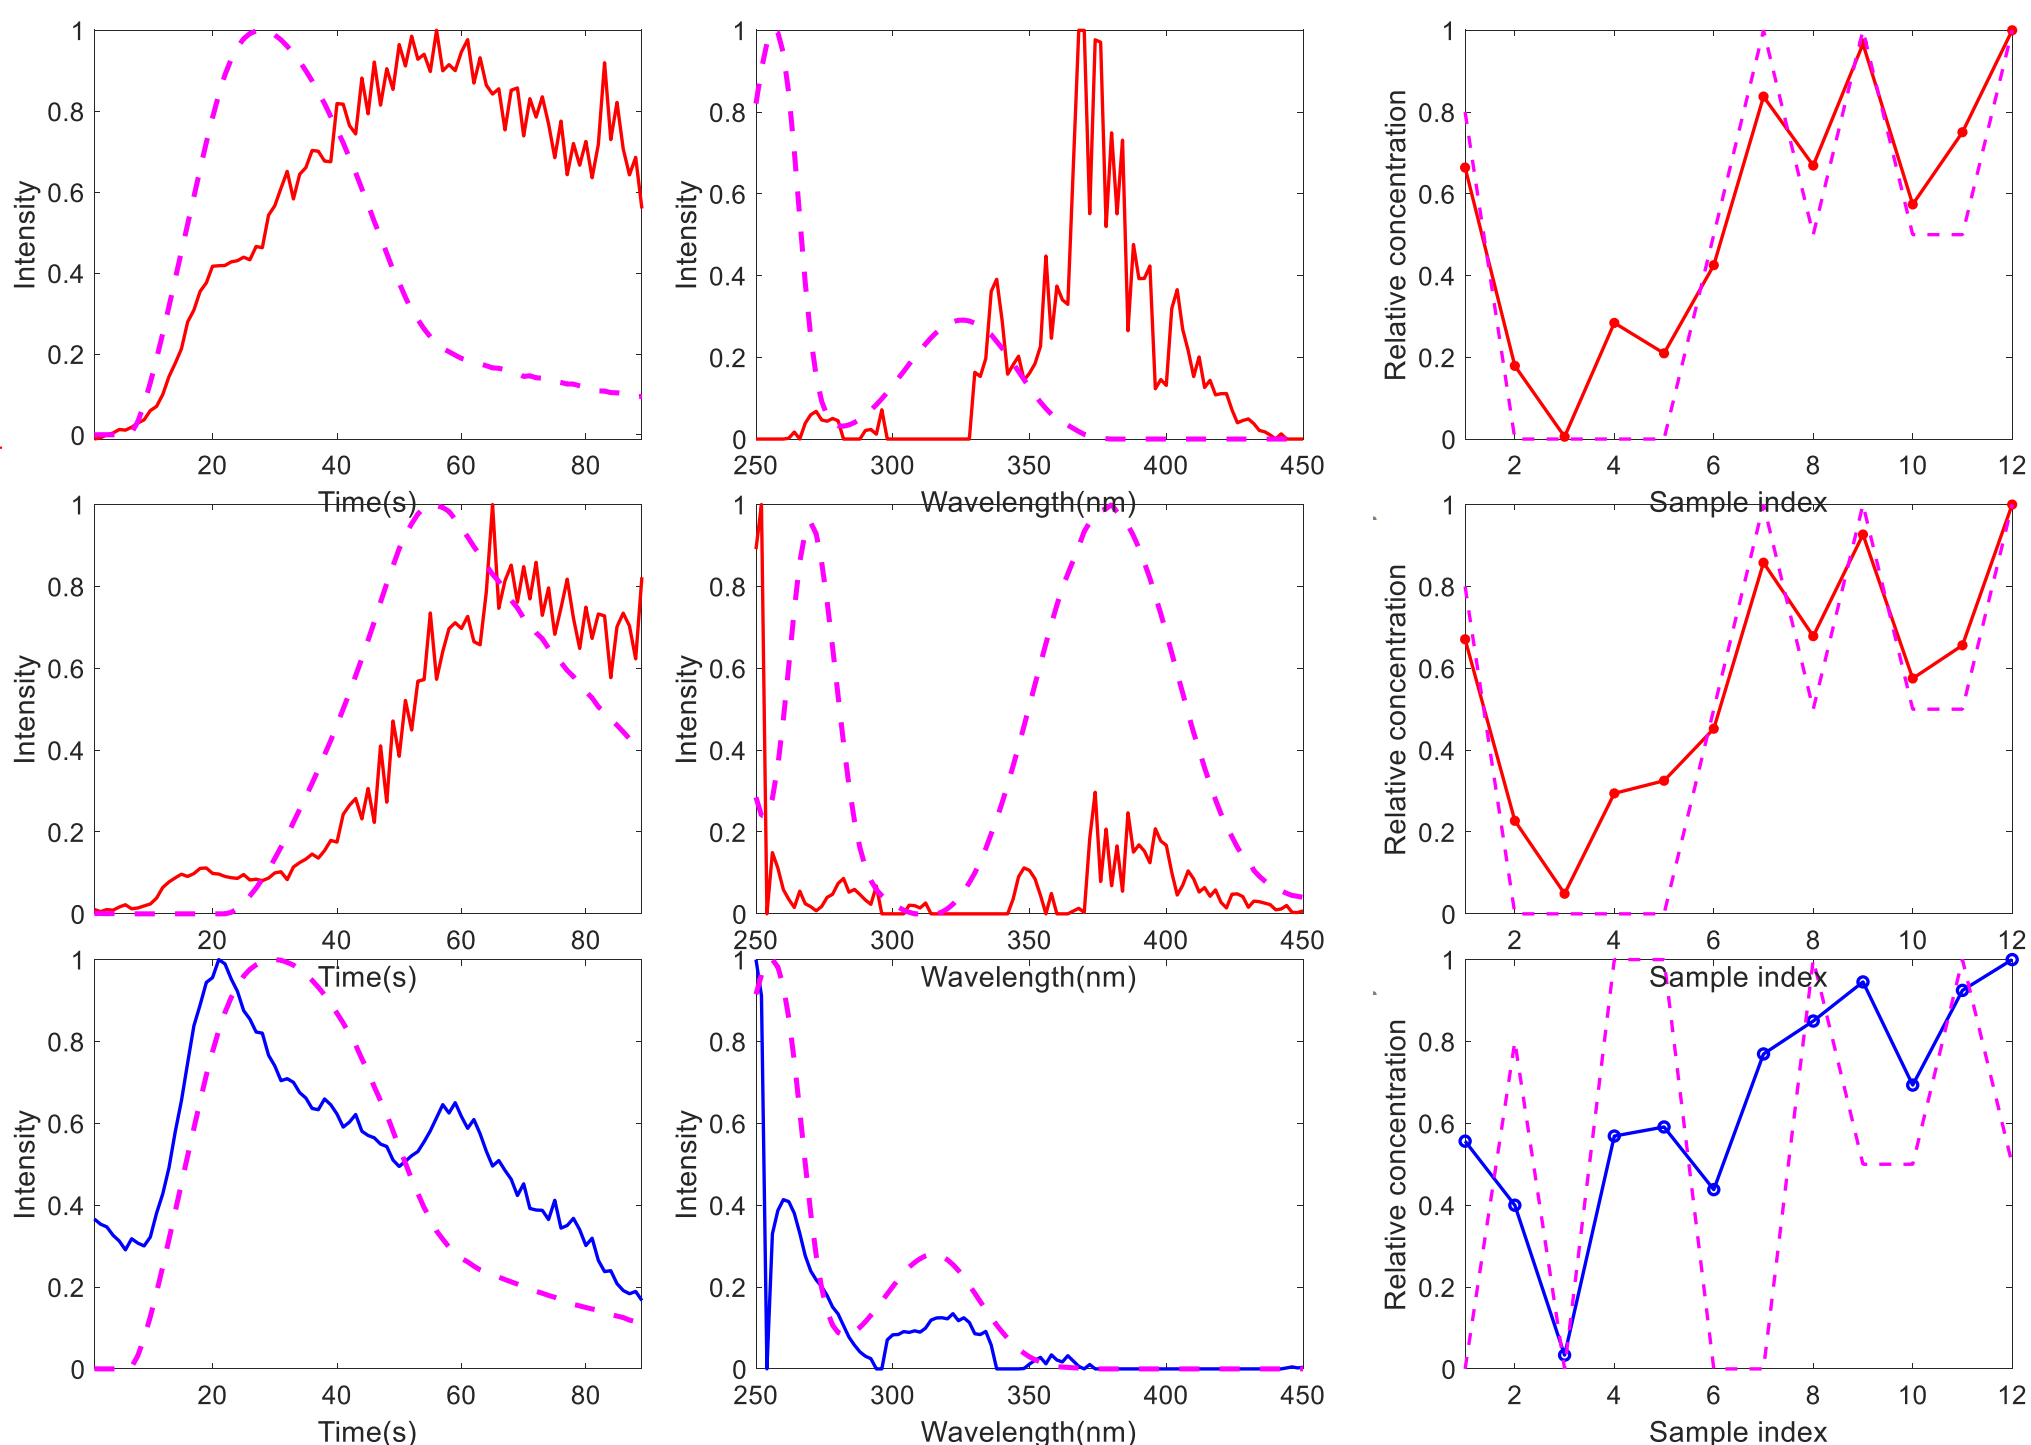

**3-HBA**

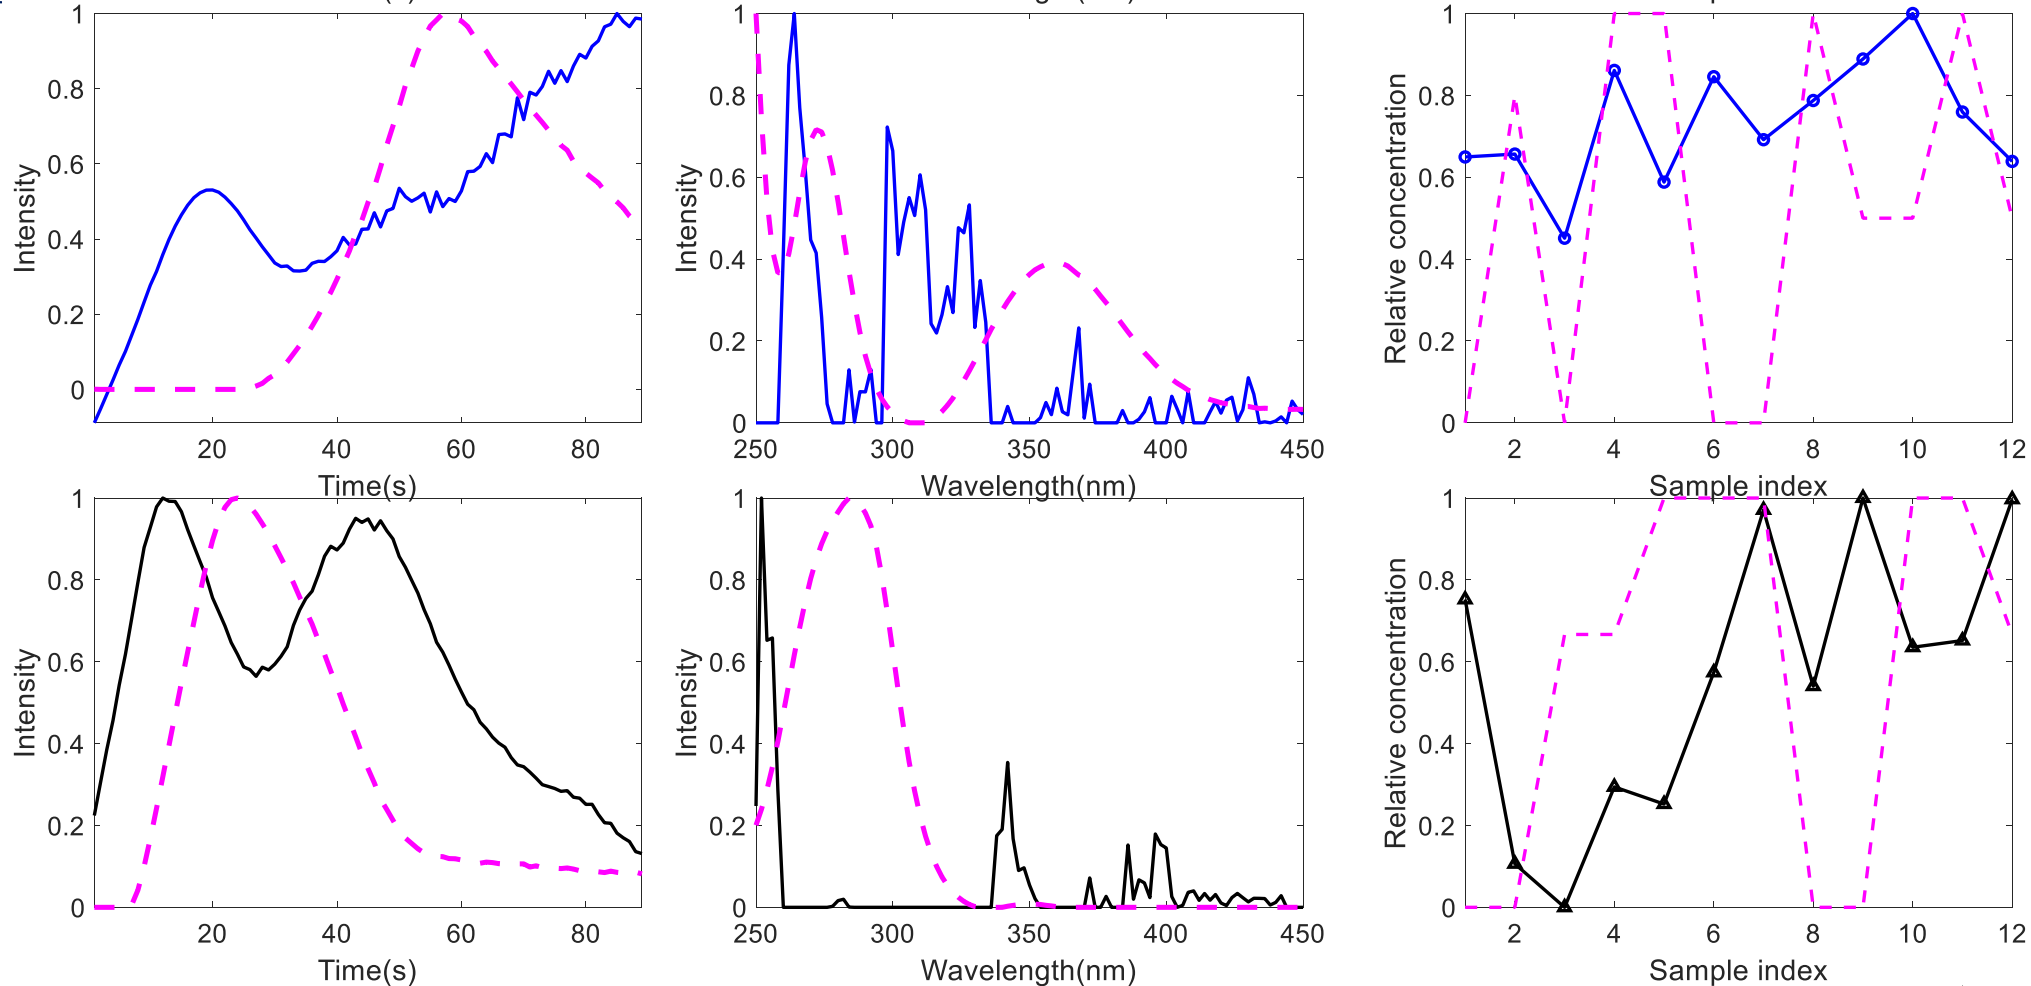

**4-HBA**

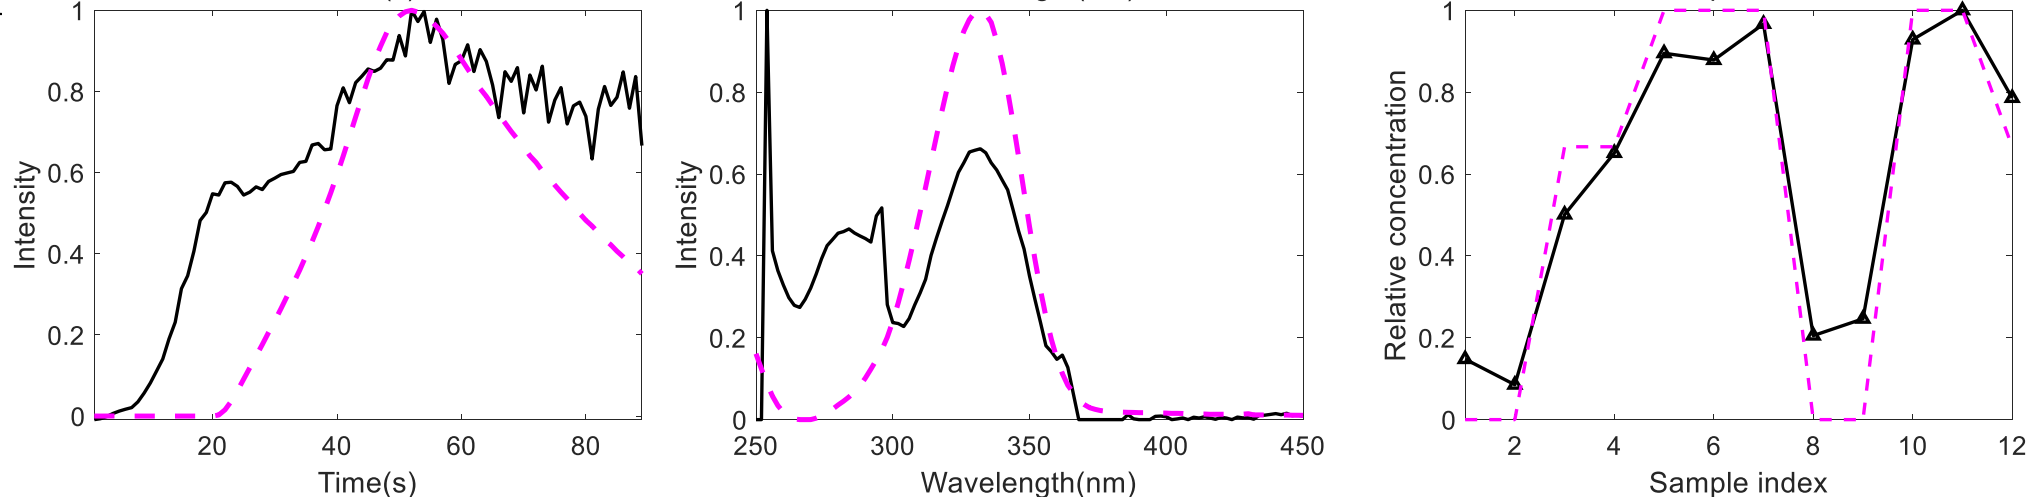

**Figure S10** FIA (left), spectra (middle), and sample (right) profiles of the six components resolved in the analysis of the pH gradient FIA-UV dataset by **DNTD**, corresponding to the two acid-base species of 2-HBA (red), 3-HBA (blue) and 4-HBA (black). Species spectra and sample profiles were compared with reference ones (cyan). See results in section 4.3 and Table 3.



2-HBA

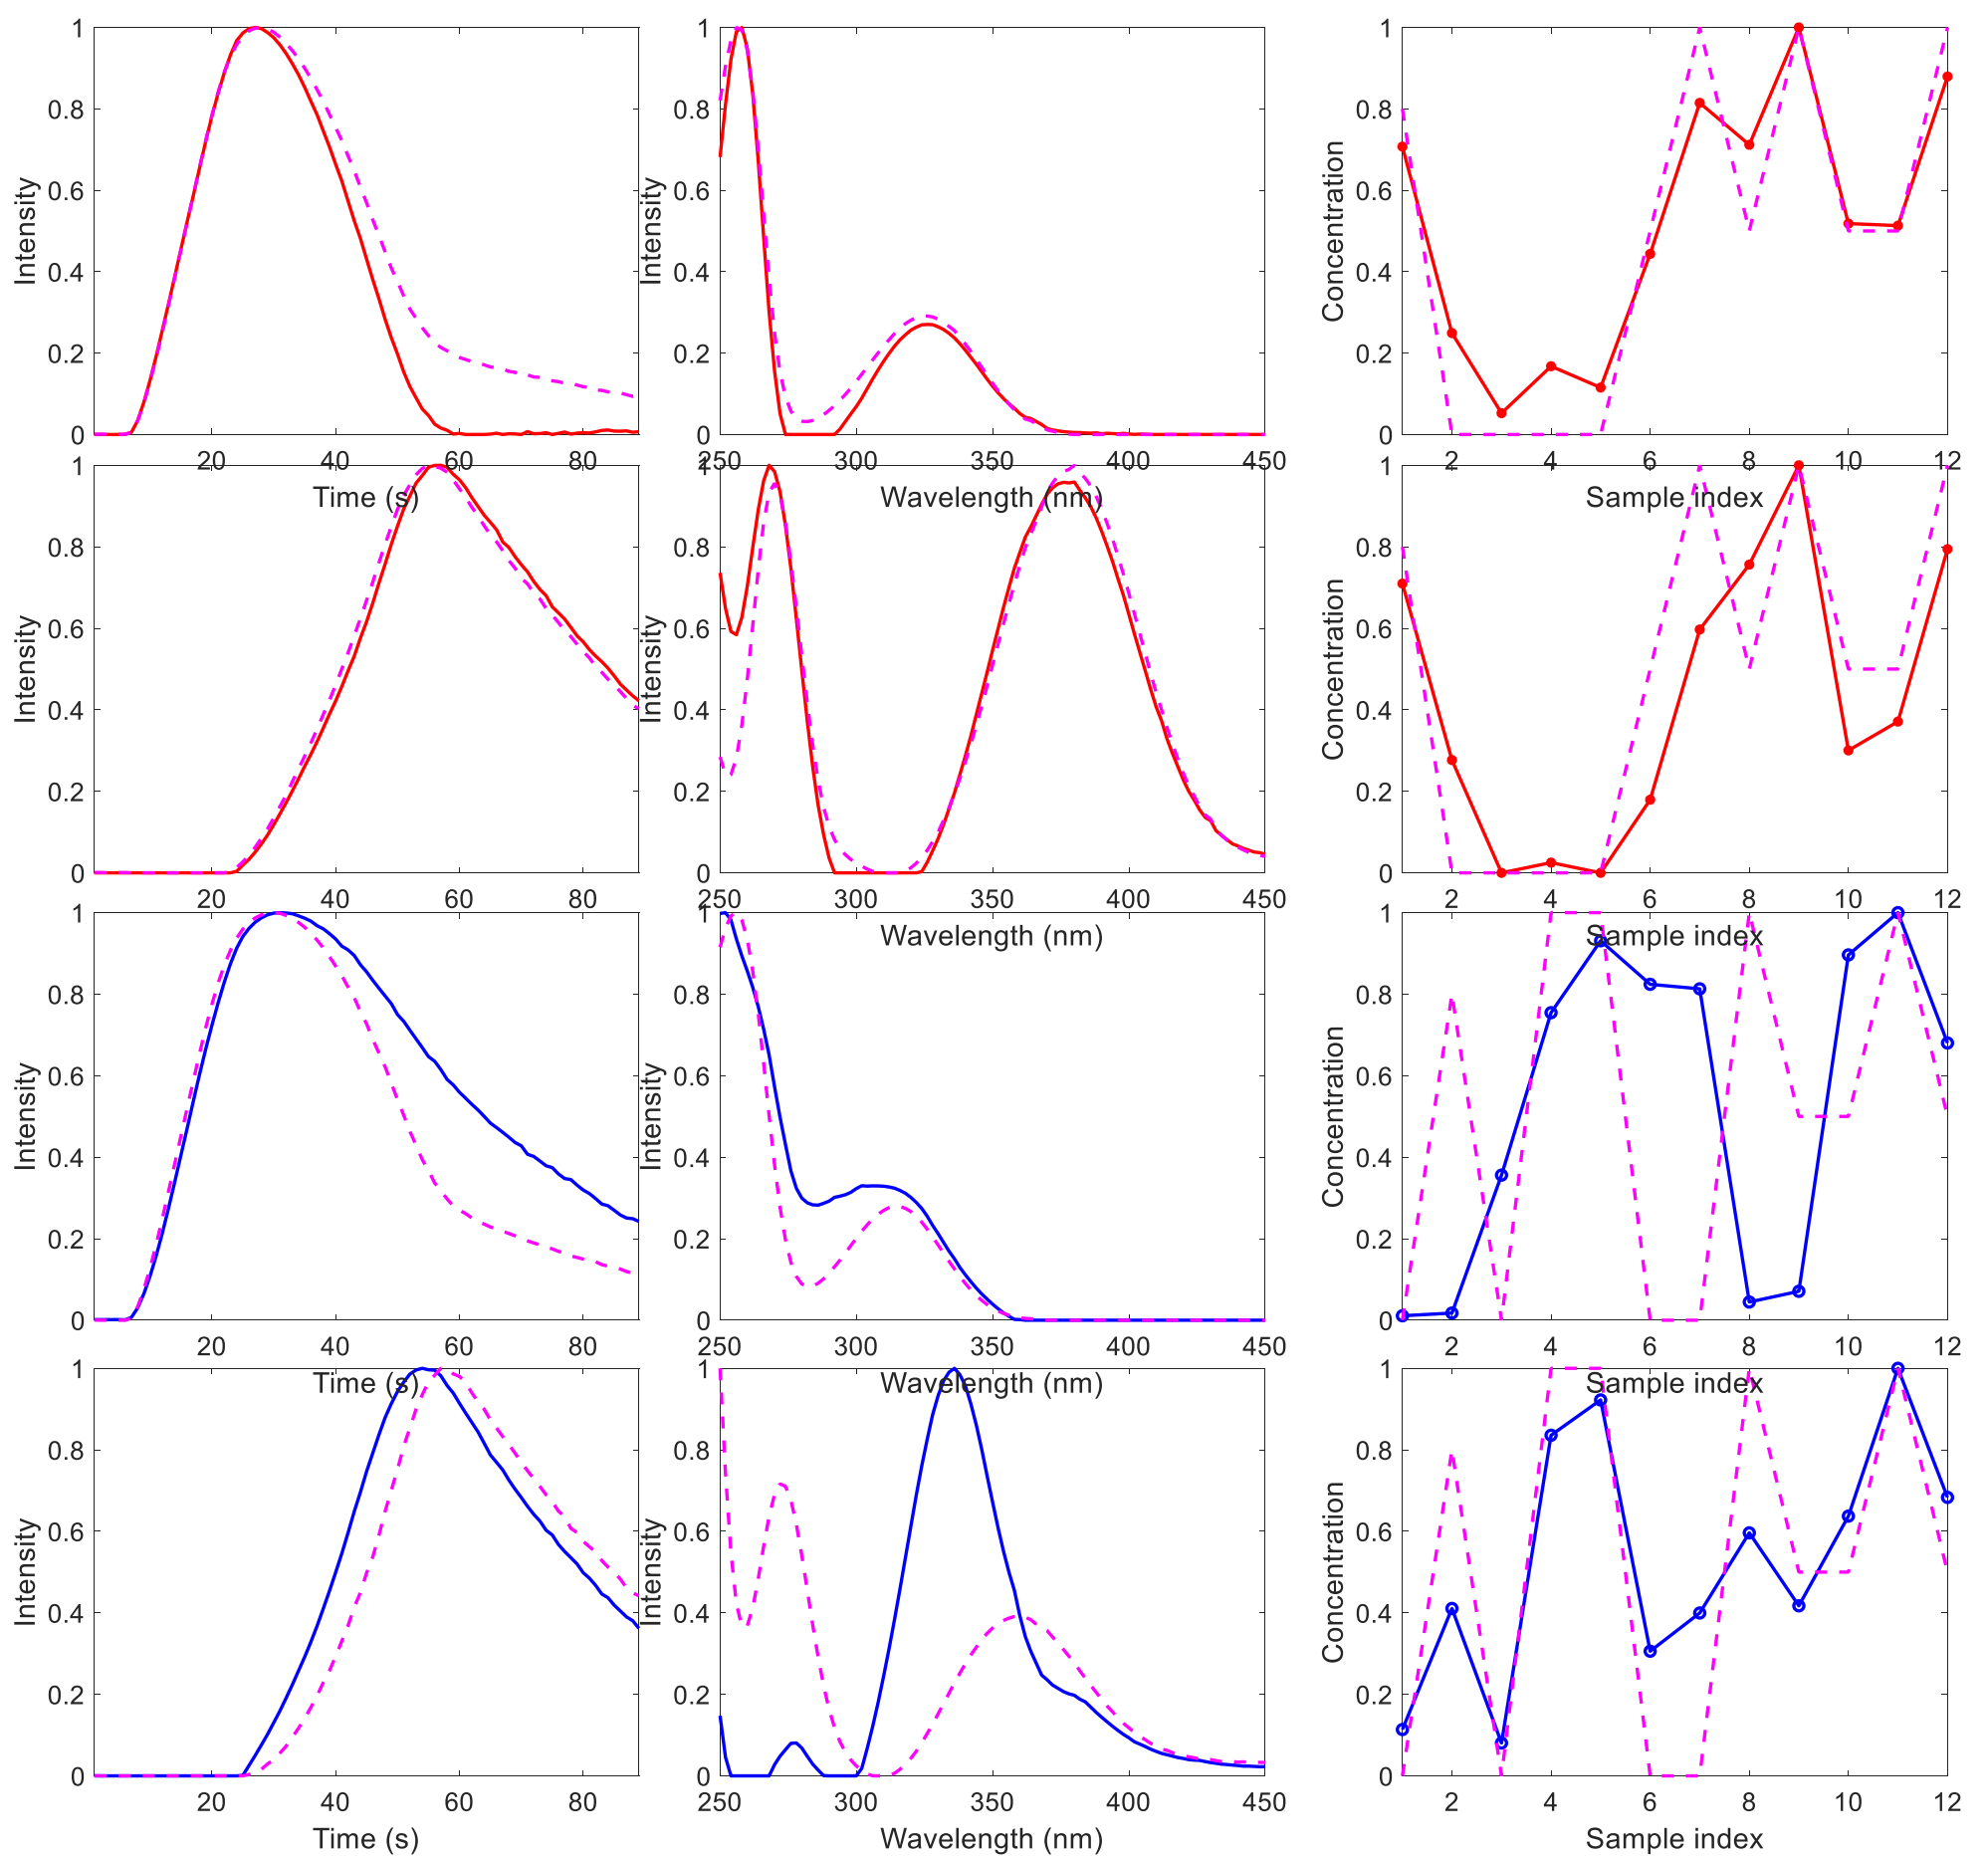

3-HBA

4-HBA

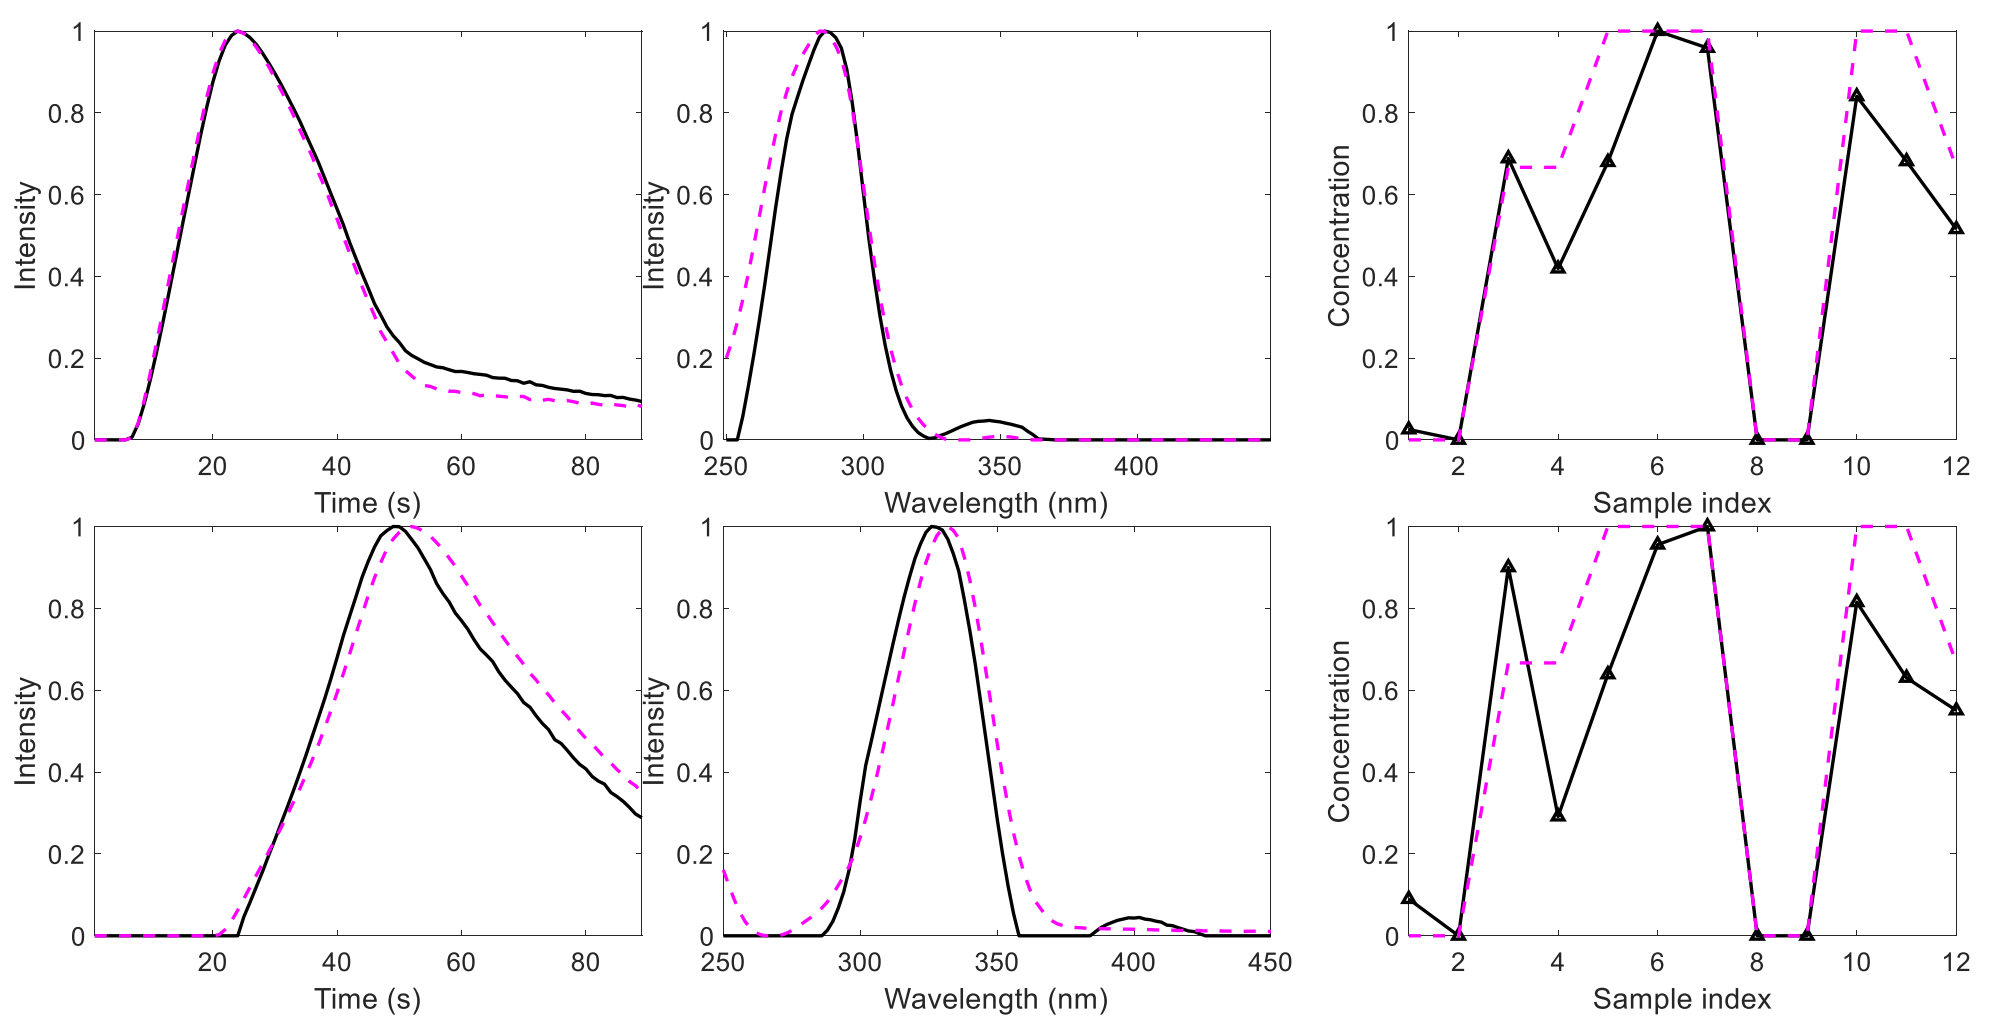

**Figure S11** FIA (left), spectra (middle), and sample (right) profiles of the six components resolved in the analysis of the pH gradient FIA-UV dataset by **PARAFAC**, corresponding to the two acid-base species of 2-HBA (red), 3-HBA (blue) and 4-HBA (black). Species spectra and sample profiles were compared with reference ones (cyan). See results in section 4.3 and Table 3.

**2-HBA**

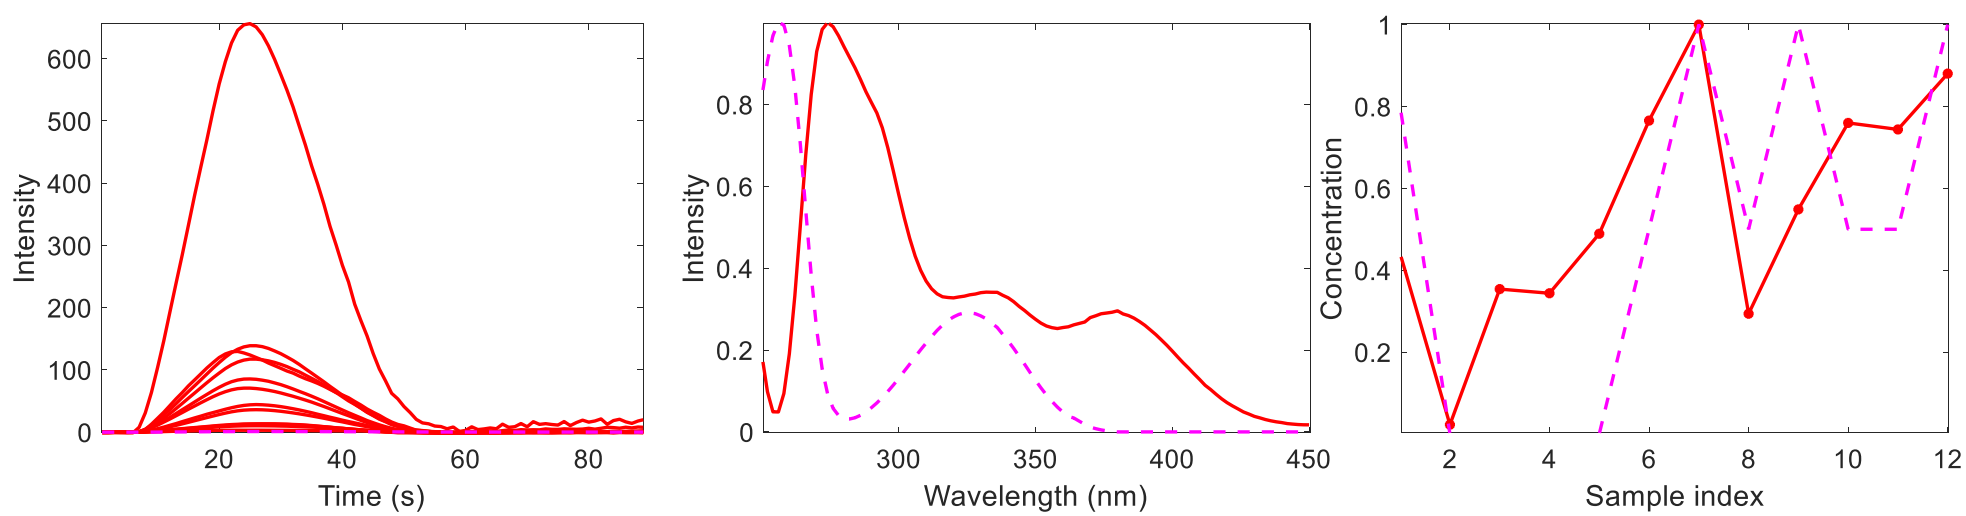

**3-HBA**

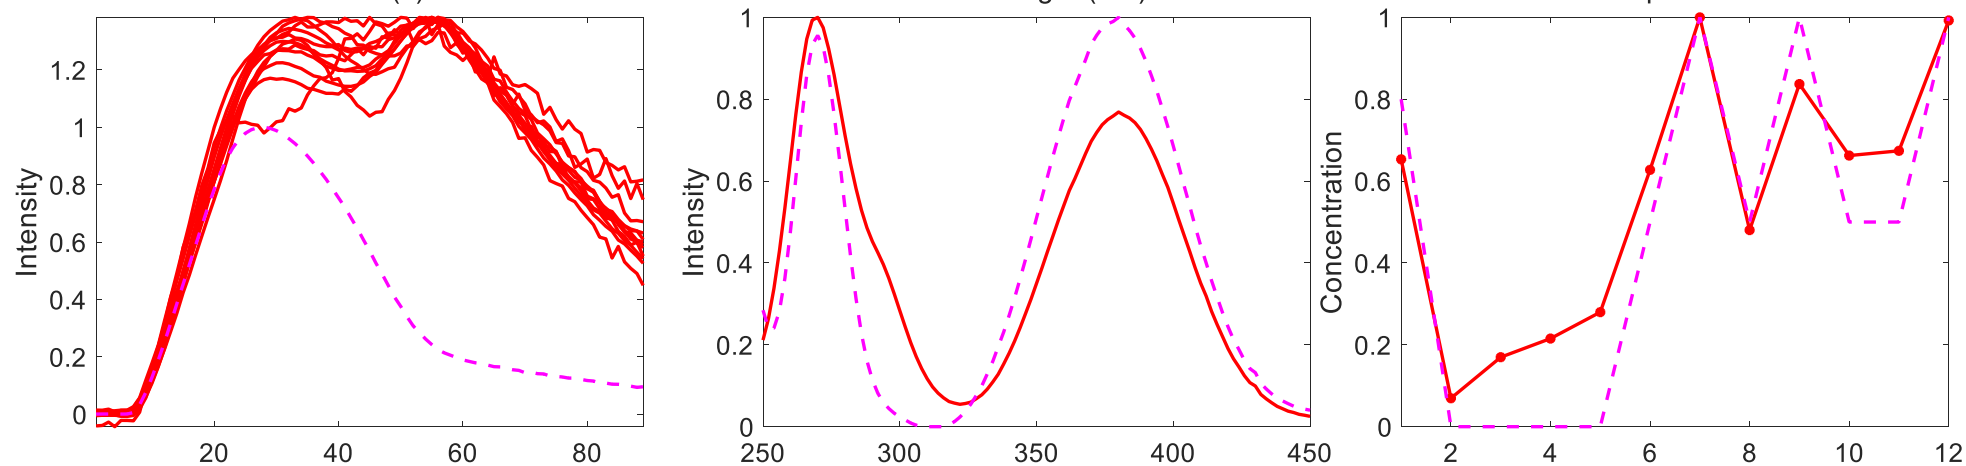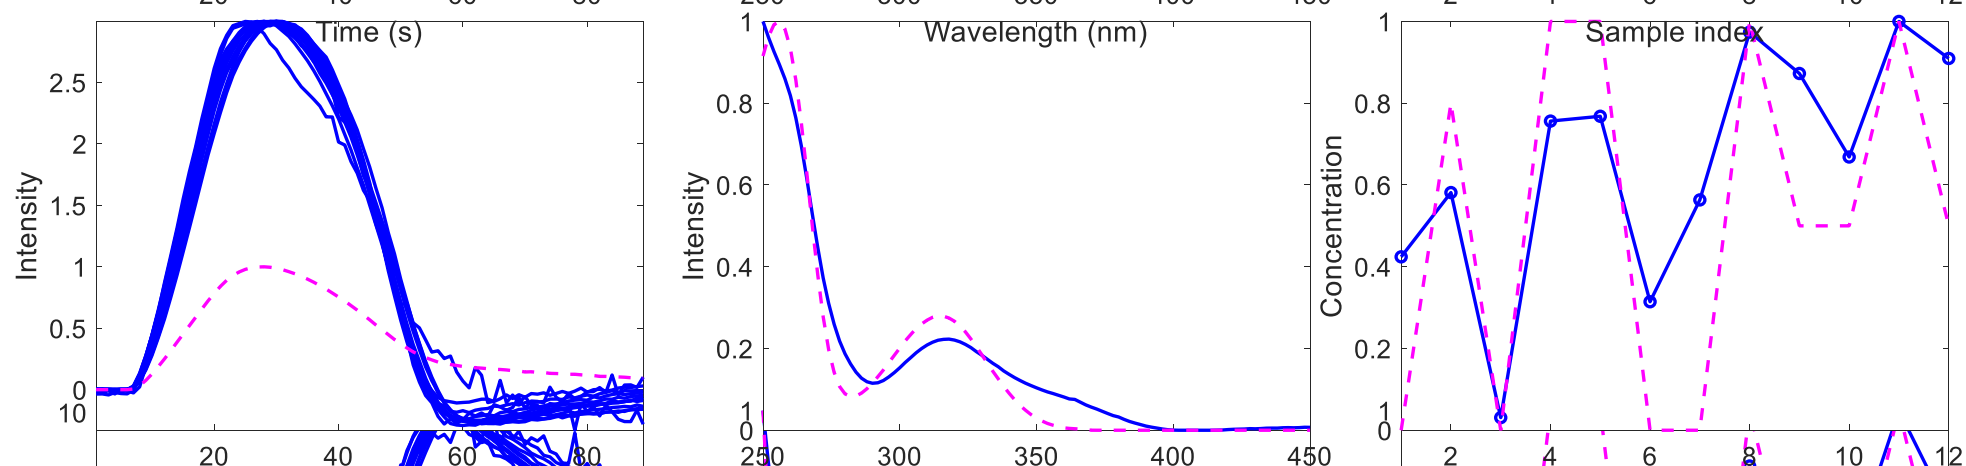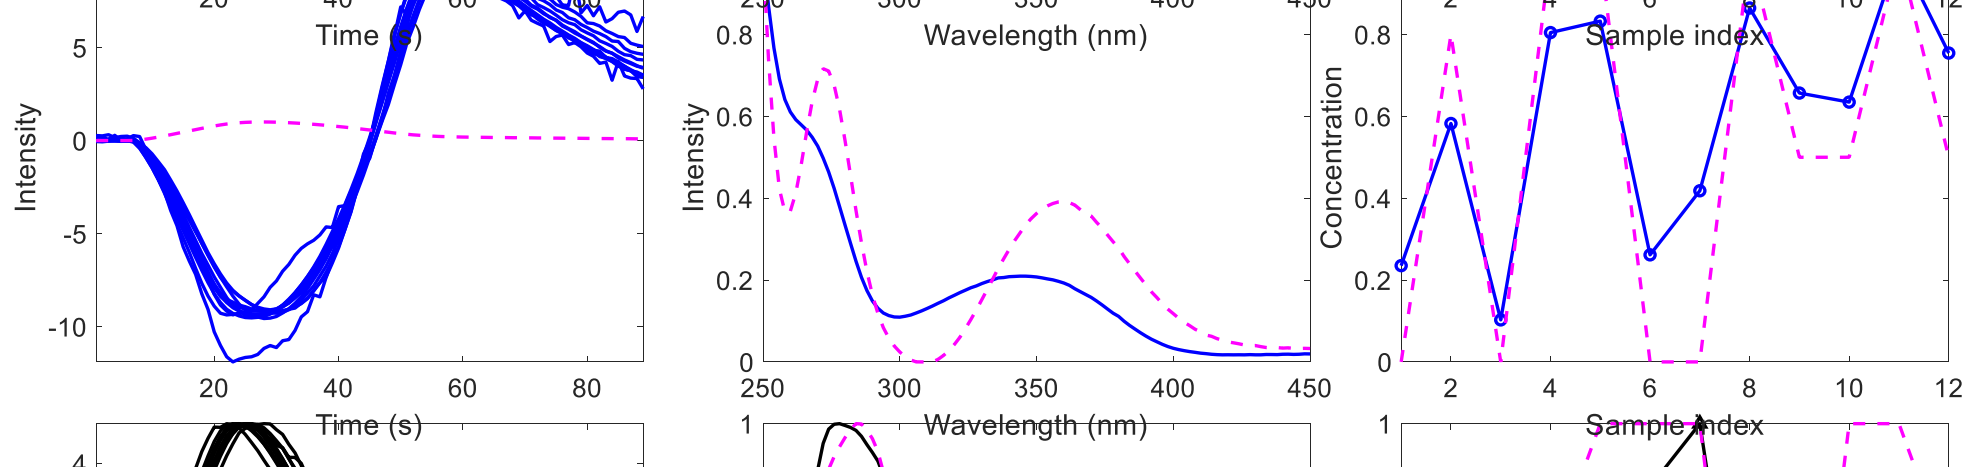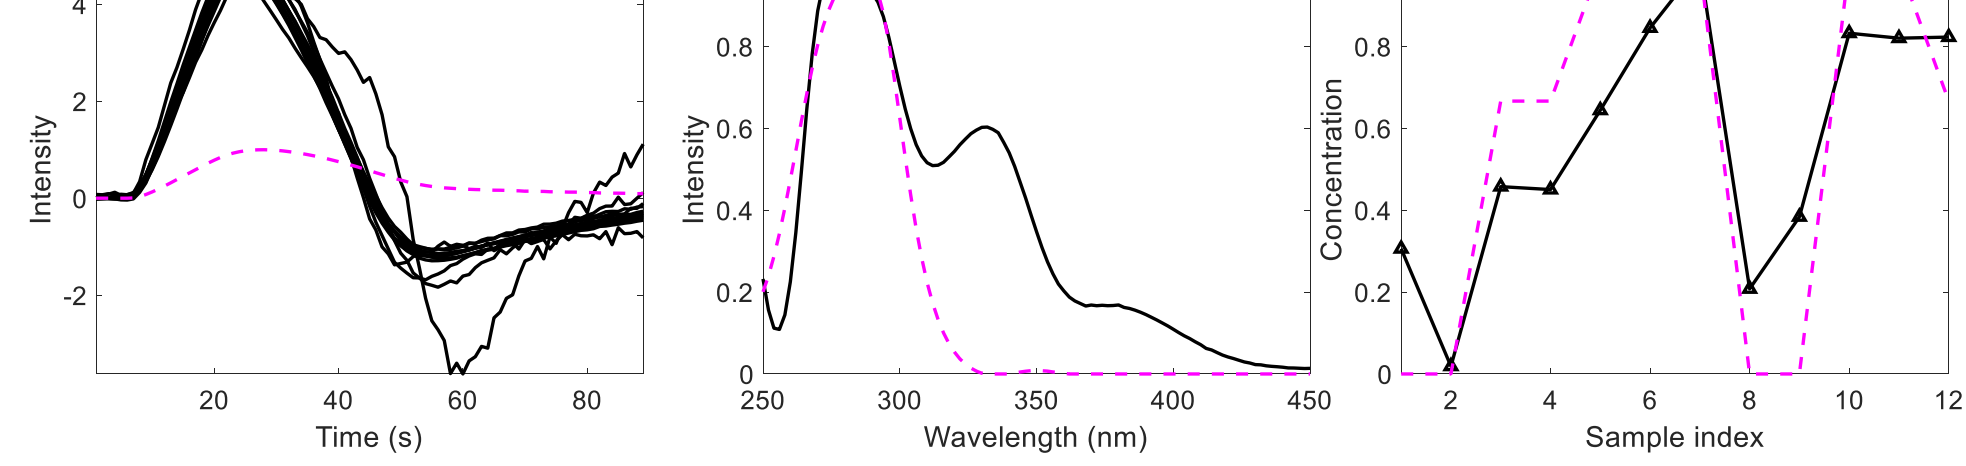

**4-HBA**

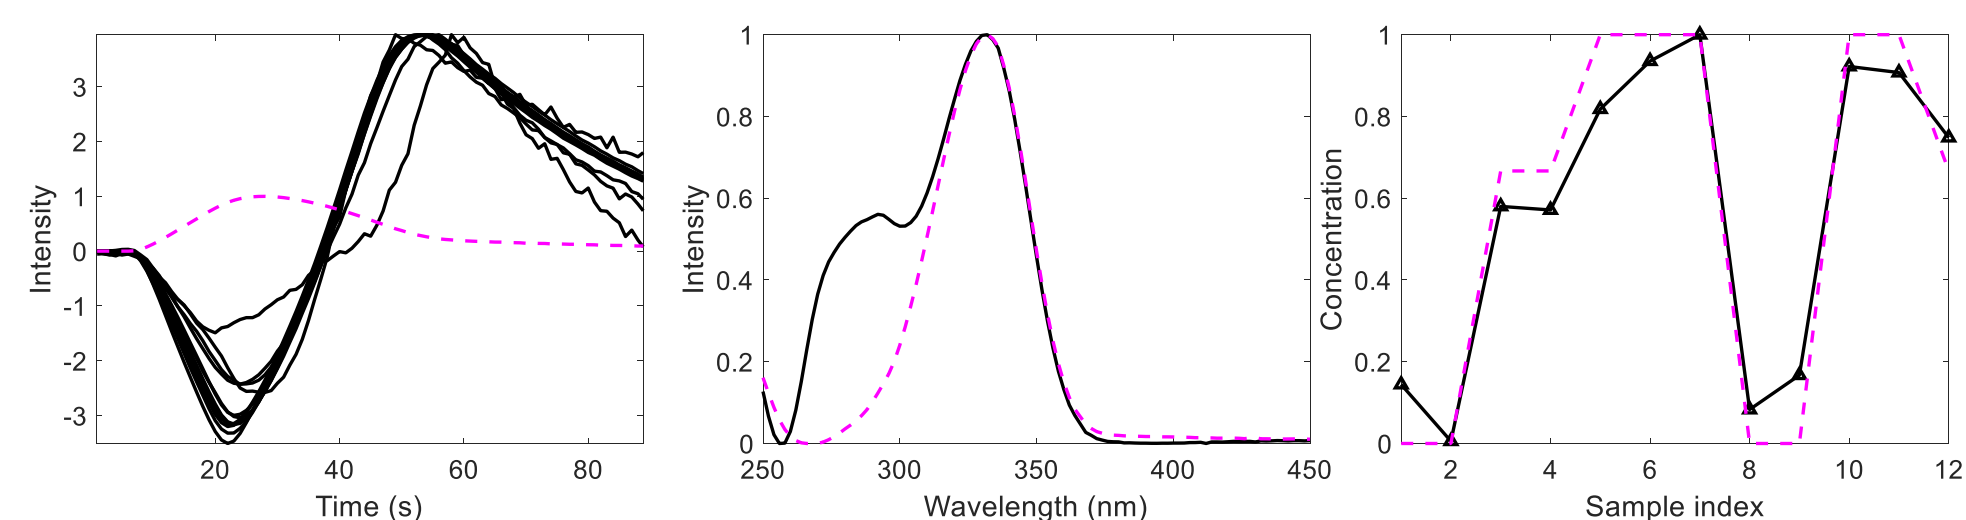

**Figure S12** FIA (left), spectra (middle), and sample (right) profiles of the six components resolved in the analysis of the pH gradient FIA-UV dataset by **PARAFAC2**, corresponding to the two acid-base species of 2-HBA (red), 3-HBA (blue) and 4-HBA (black). Species spectra and sample profiles were compared with reference ones (cyan). See results in section 4.3 and Table 3.

2-HBA

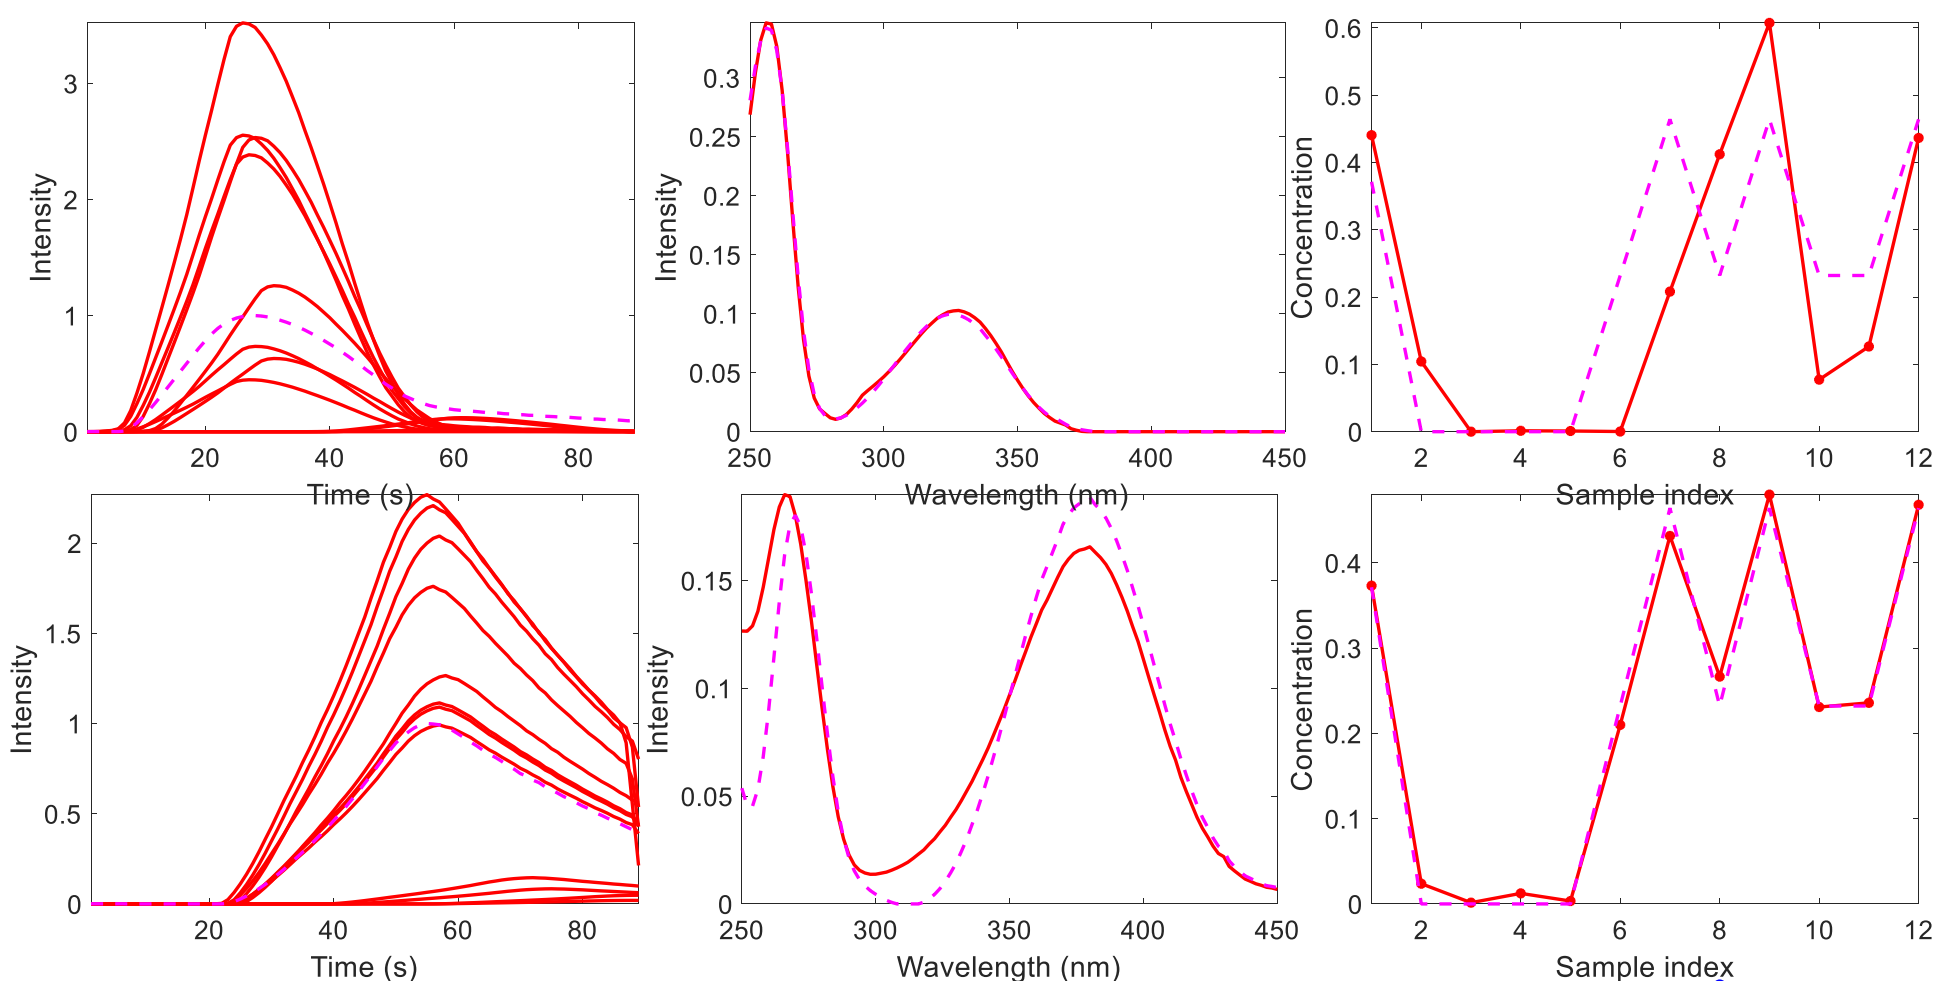

3-HBA

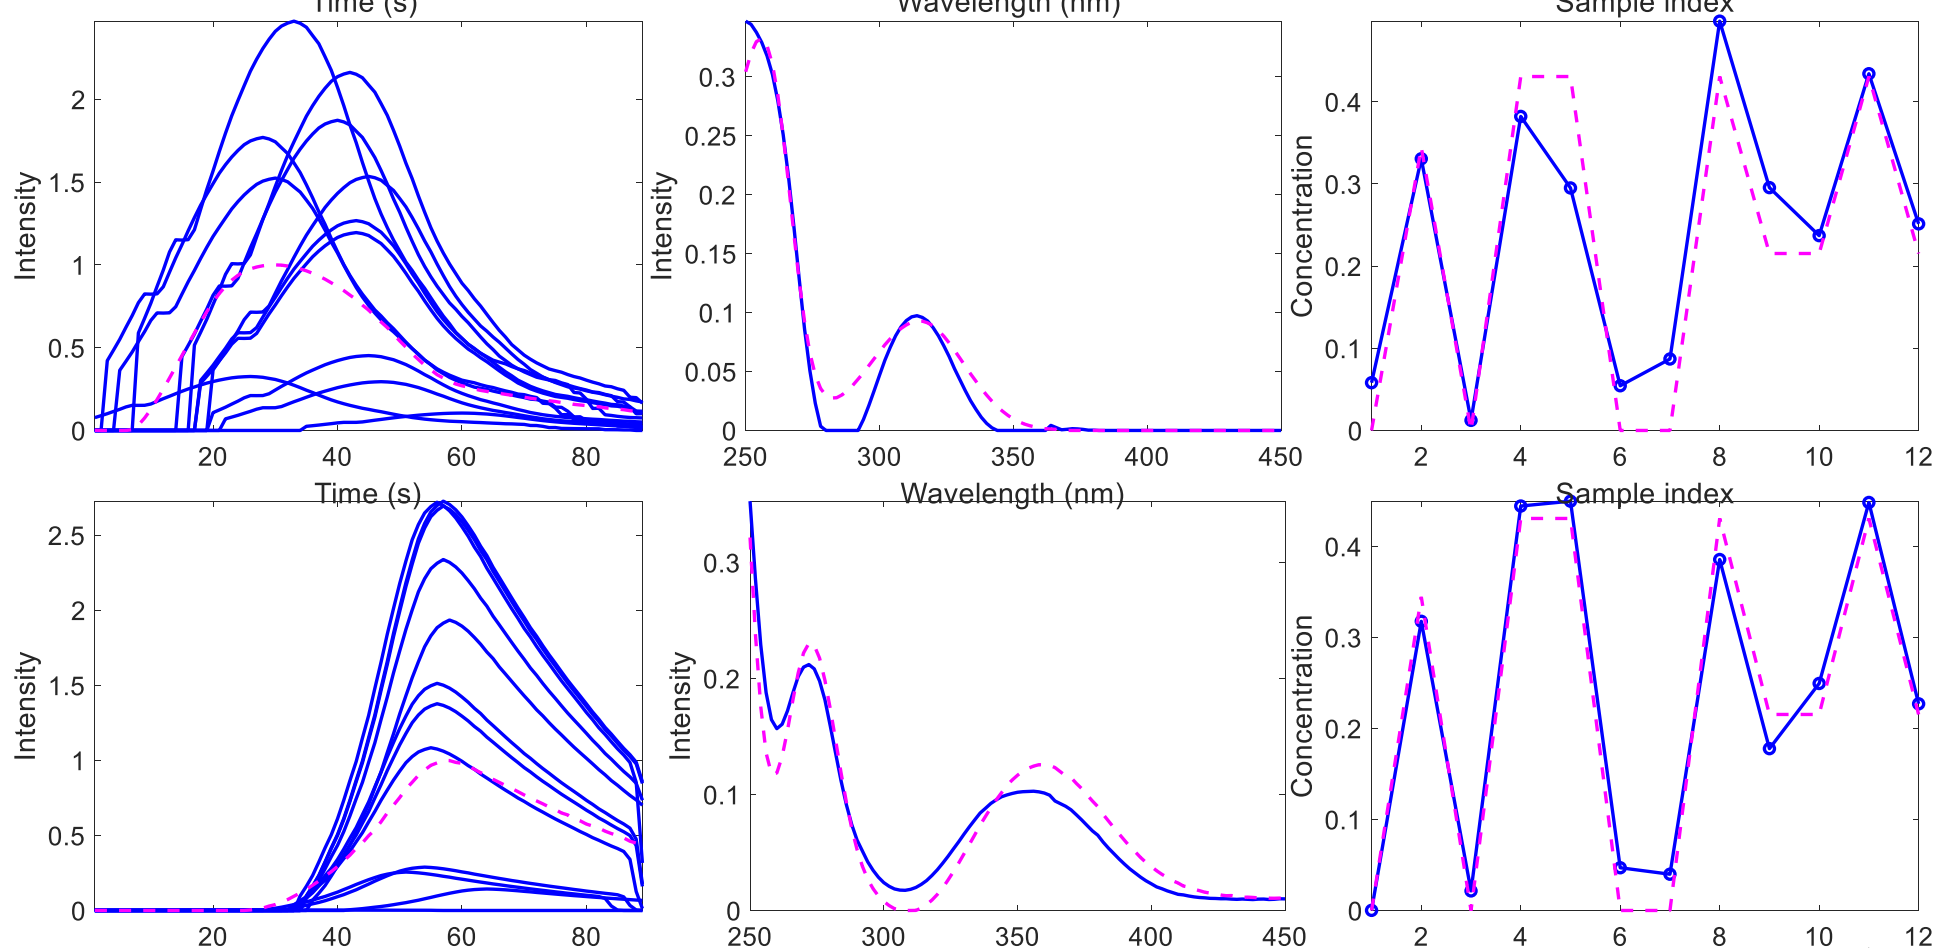

4-HBA

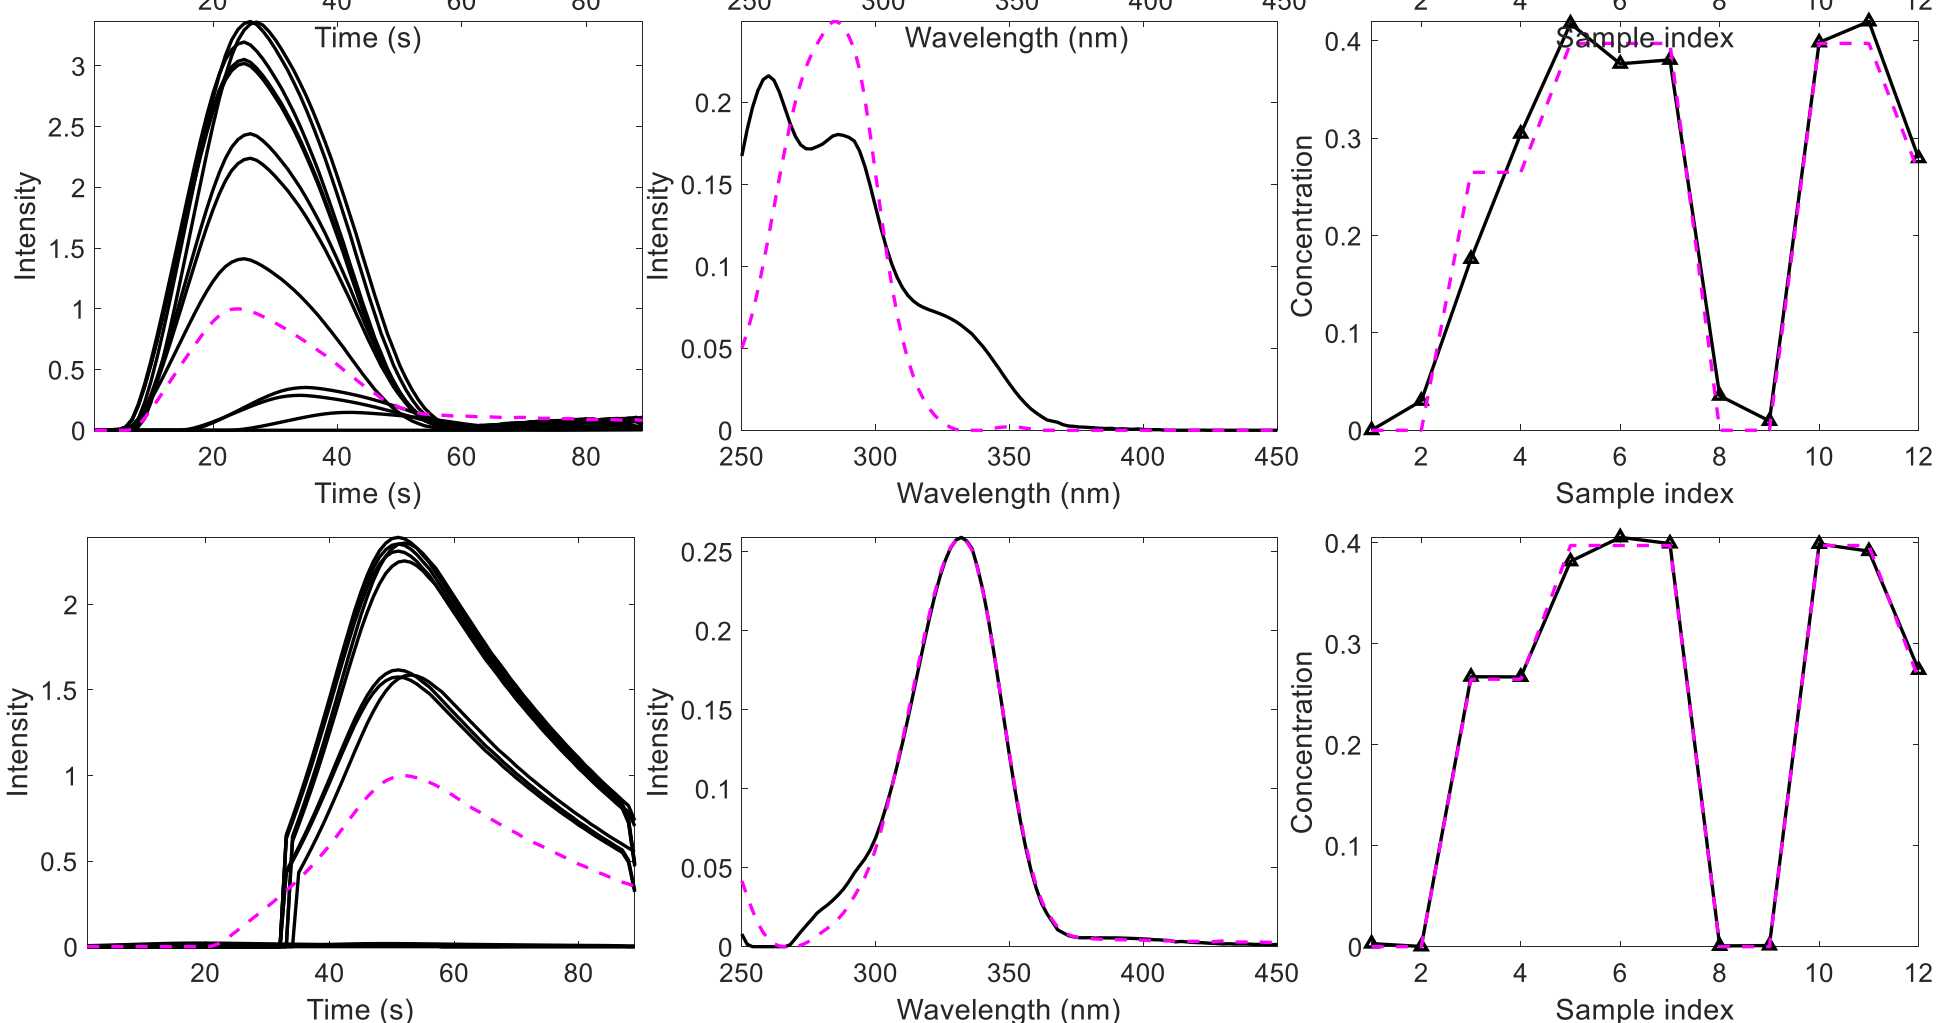

**Figure S13** FIA (left), spectra (middle), and sample (right) profiles of the six components resolved in the analysis of the pH gradient FIA-UV dataset by **MCR-ALS trilinear (1,1,1)** corresponding to the two acid-base species of 2-HBA (red), 3-HBA (blue) and 4-HBA (black). Species spectra and sample profiles were compared with reference ones (cyan). See results in section 4.3 and Table 3.



**2-HBA**

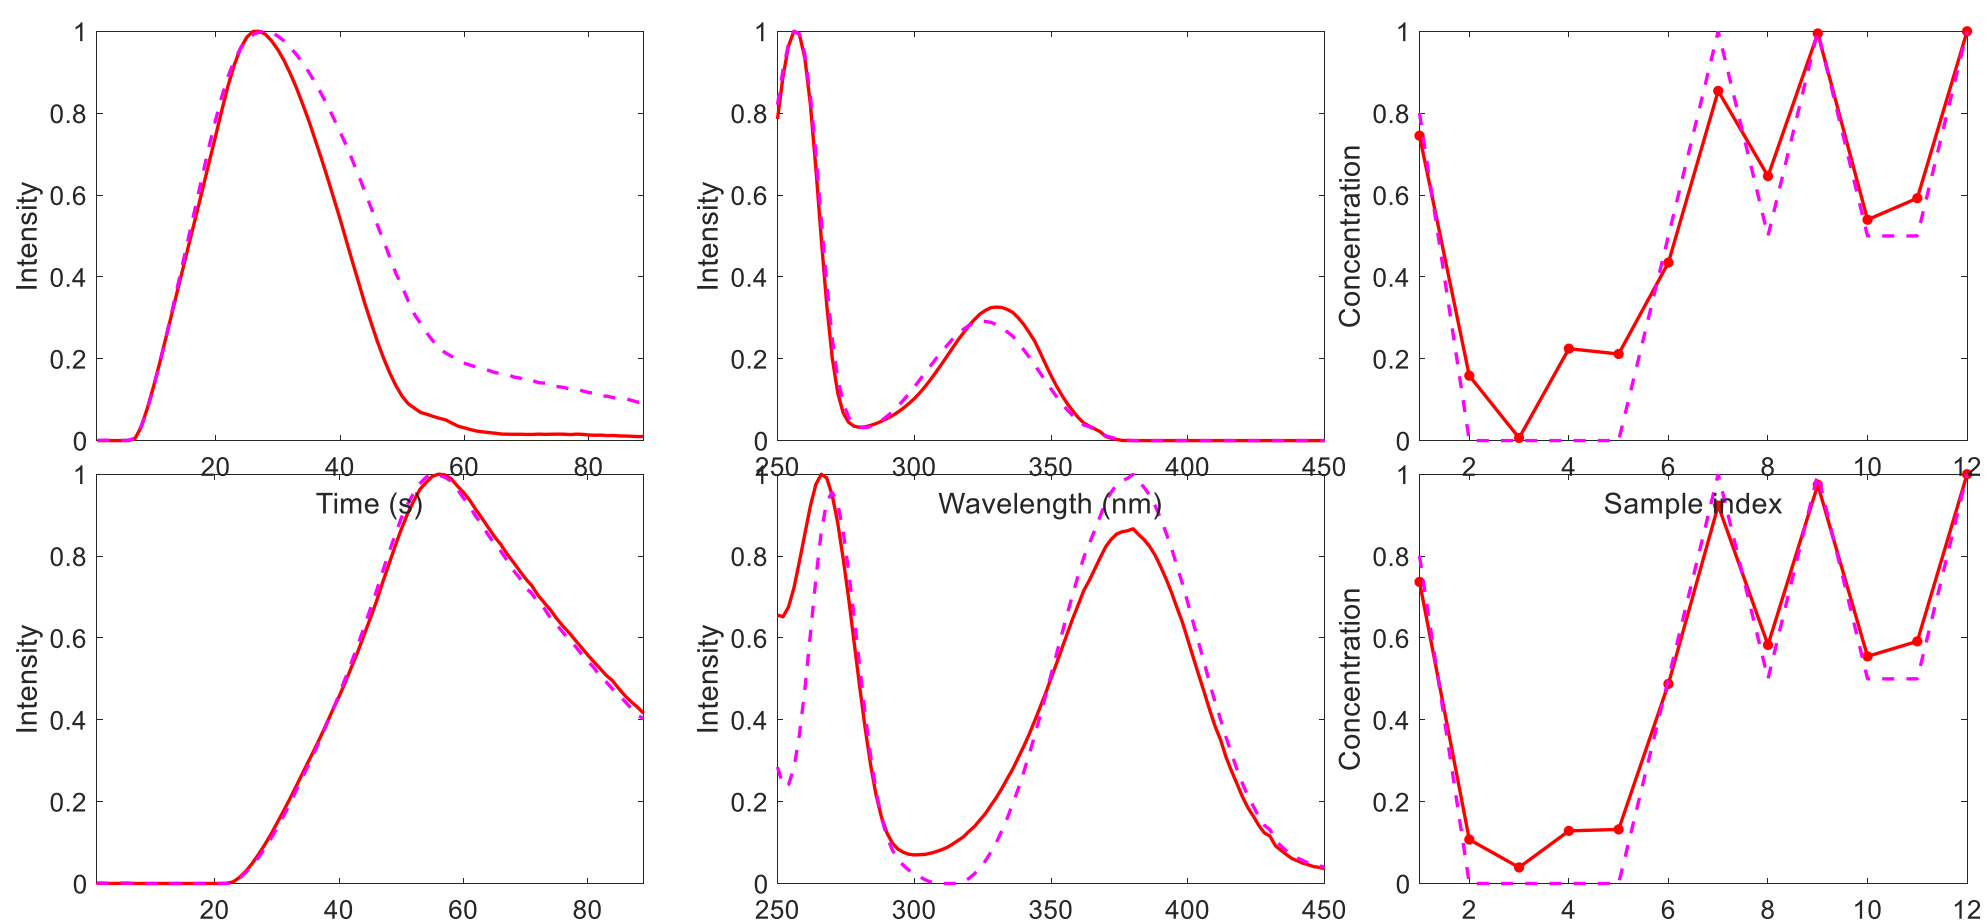

**3-HBA**

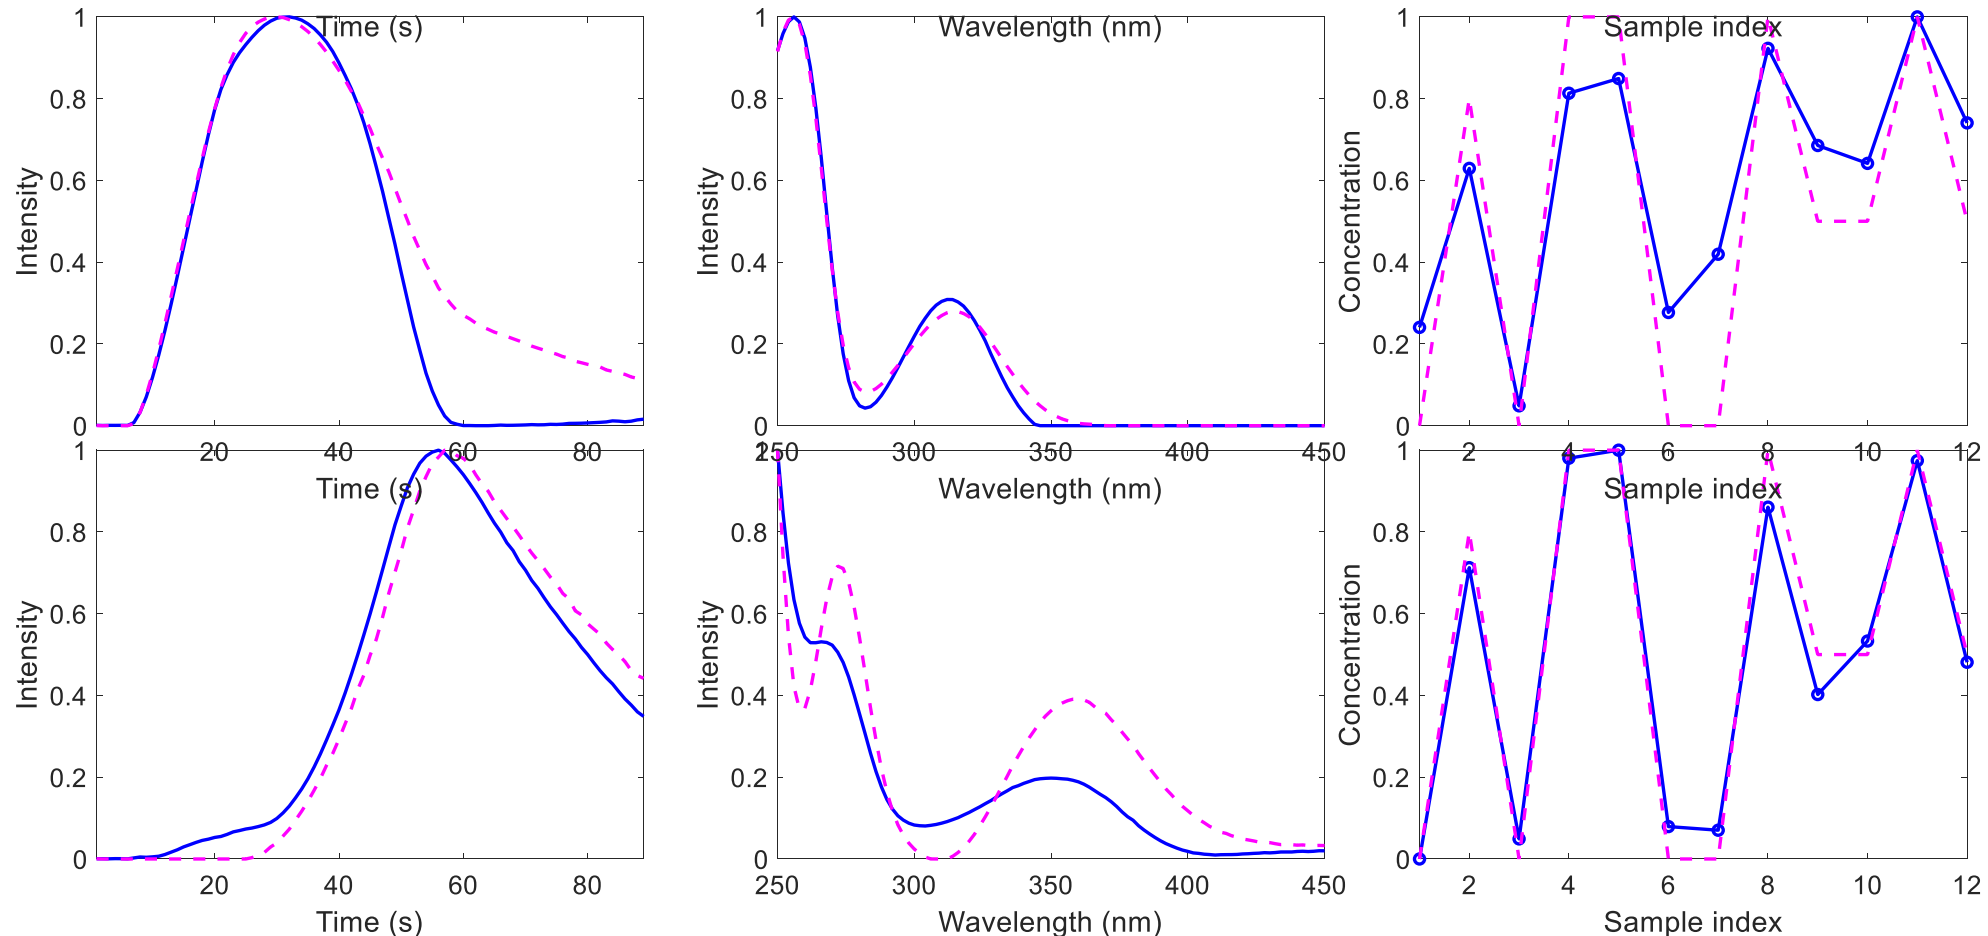

**4-HBA**

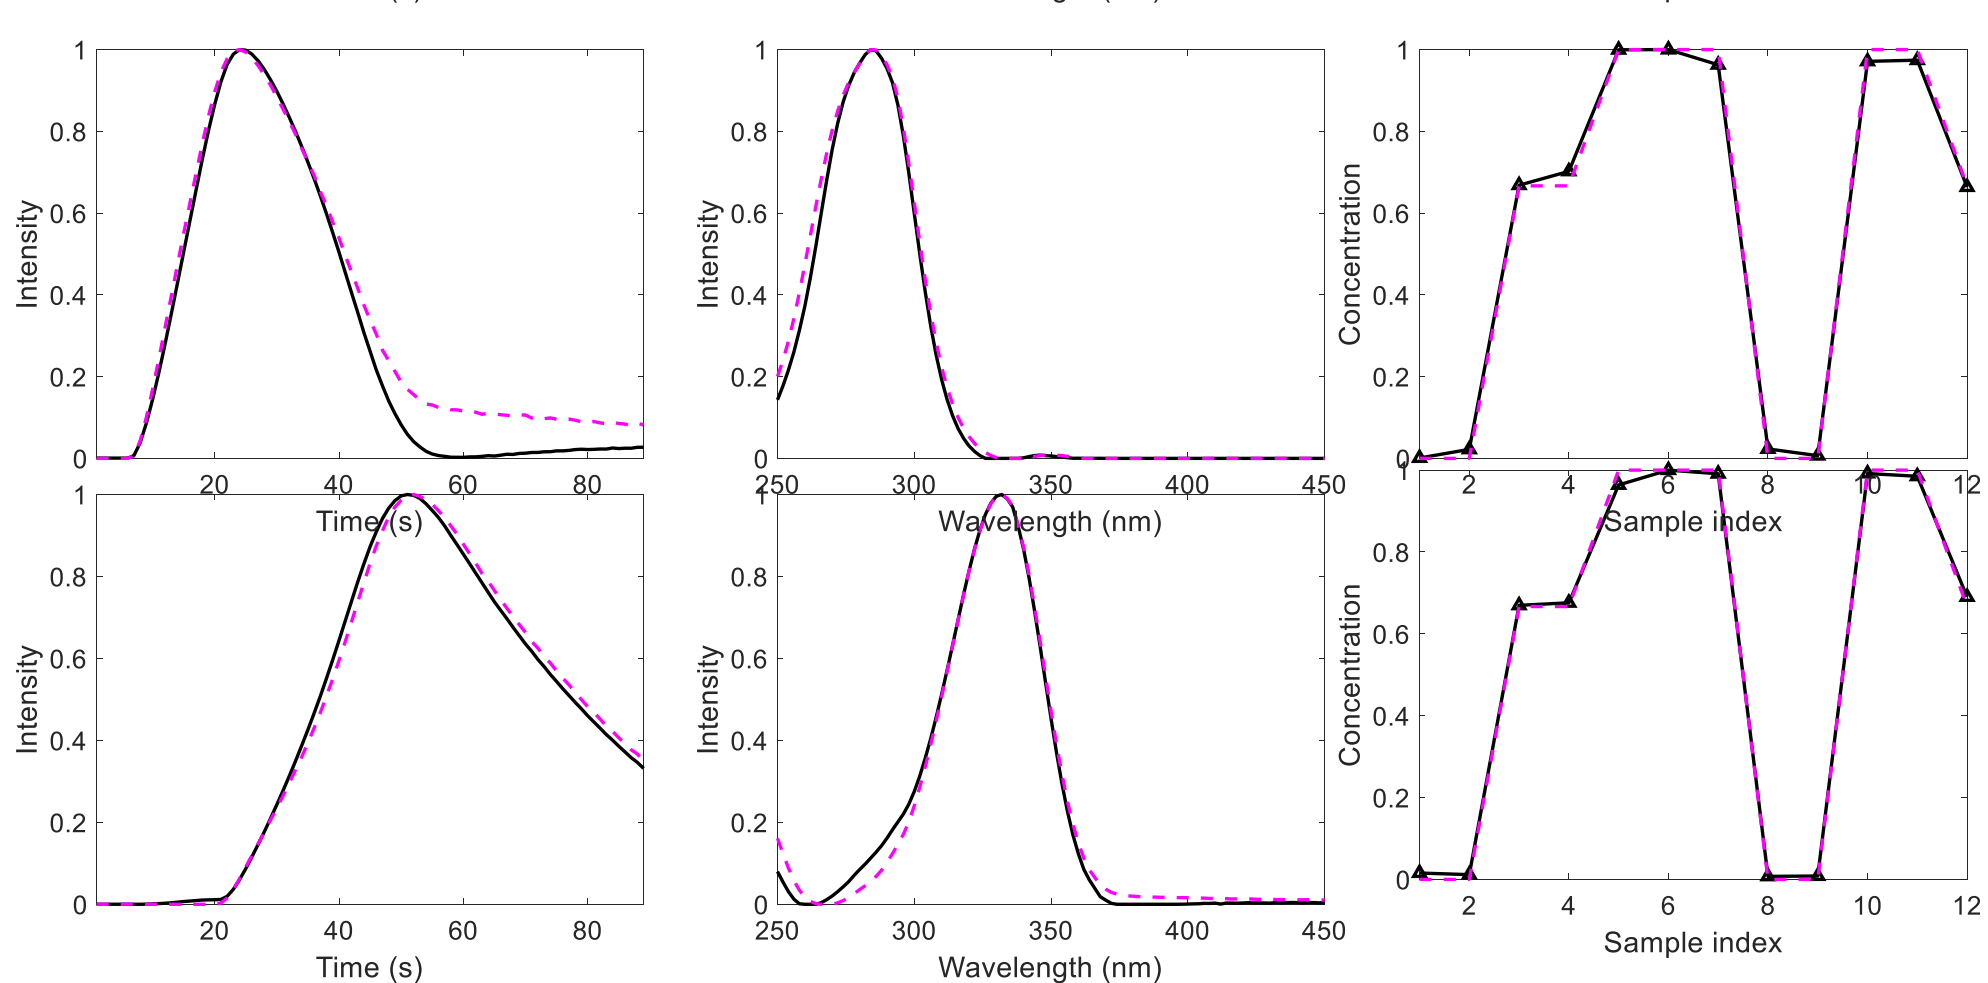

**Figure S14** FIA (left), spectra (middle), and sample (right) profiles of the six components resolved in the analysis of the pH gradient FIA-UV dataset by **MCR-ALS trilinear (2,2,2)** corresponding to the two acid-base species of 2-HBA (red), 3-HBA (blue) and 4-HBA (black). Species spectra and sample profiles were compared with reference ones (cyan). See results in section 4.3 and Table 3.

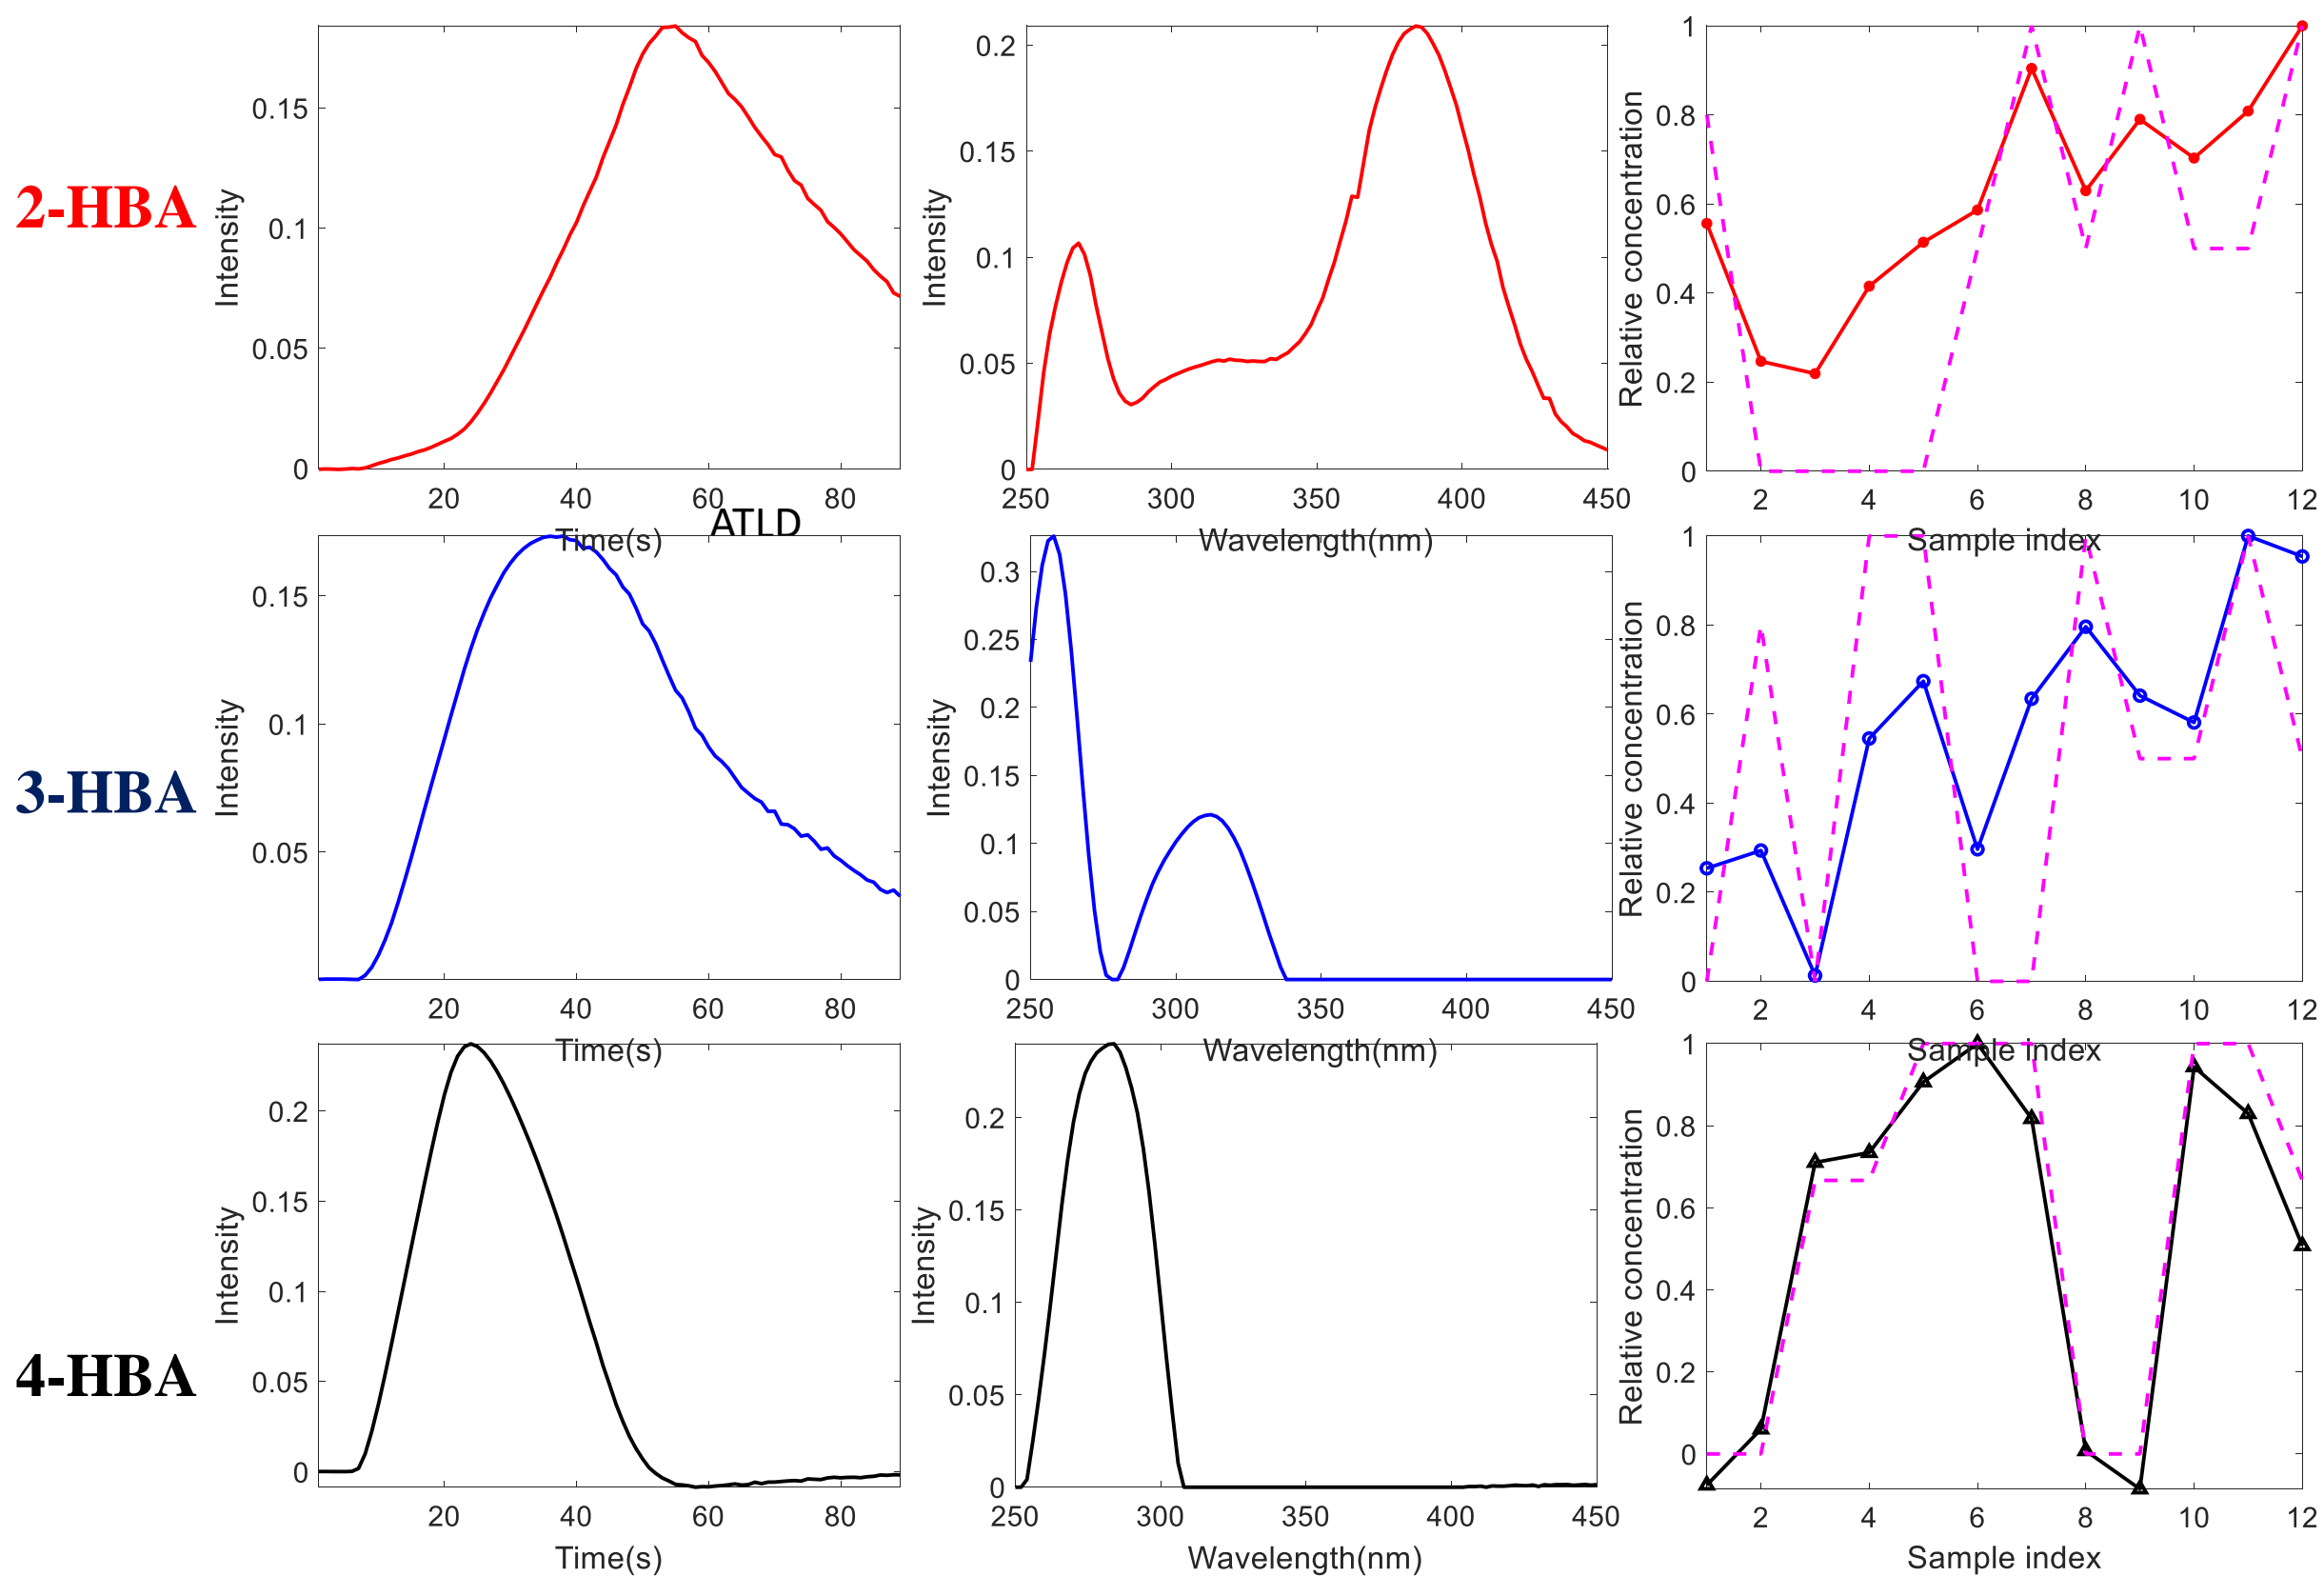

**Figure S15** FIA (left), spectra (middle), and sample (right) profiles using three components resolved in the analysis of the pH gradient FIA-UV dataset by **ATLD** of 2-HBA (red), 3-HBA (blue) and 4-HBA (black). Sample profiles were compared with reference ones (cyan). See results in section 4.3 and Table 3.

Figure S15

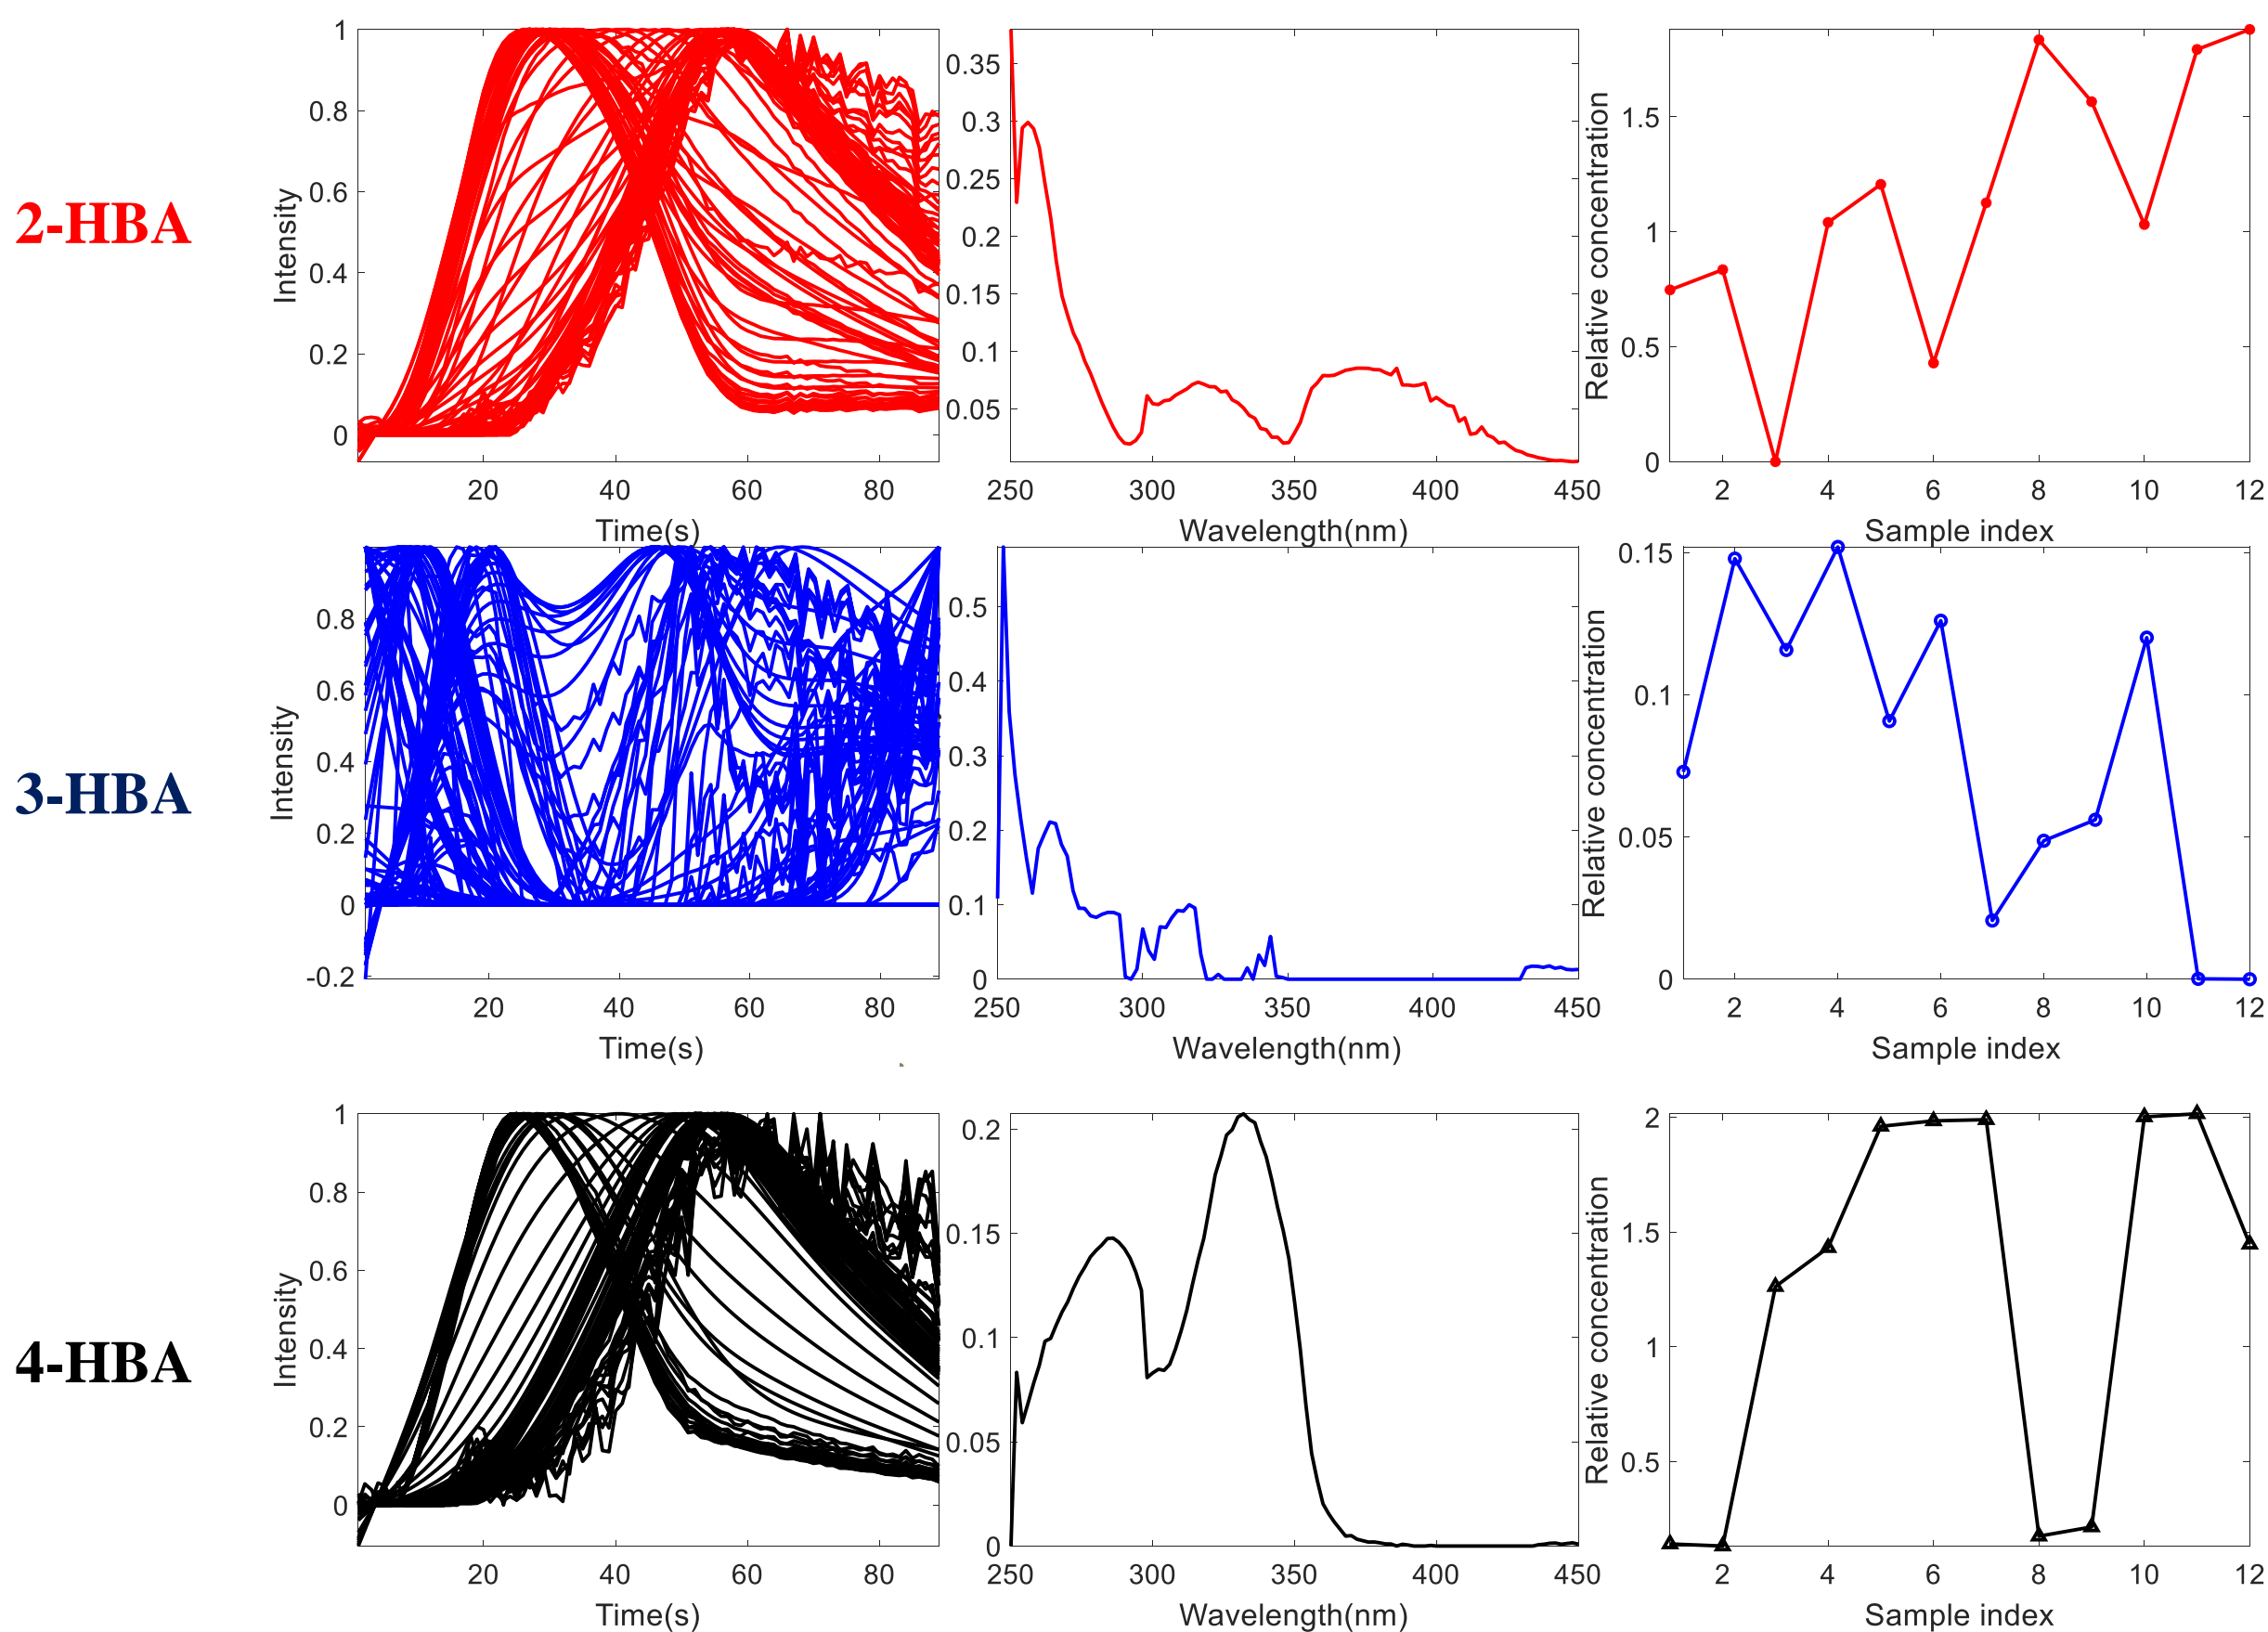

**Figure S16** FIA (left), spectra (middle), and sample (right) profiles using three components resolved in the analysis of the pH gradient FIA-UV dataset by **DNTD** of 2-HBA (red), 3-HBA (blue) and 4-HBA (black). Sample profiles were compared with reference ones (cyan). See results in section 4.3 and Table 3.

Figure S16

**2-HBA**

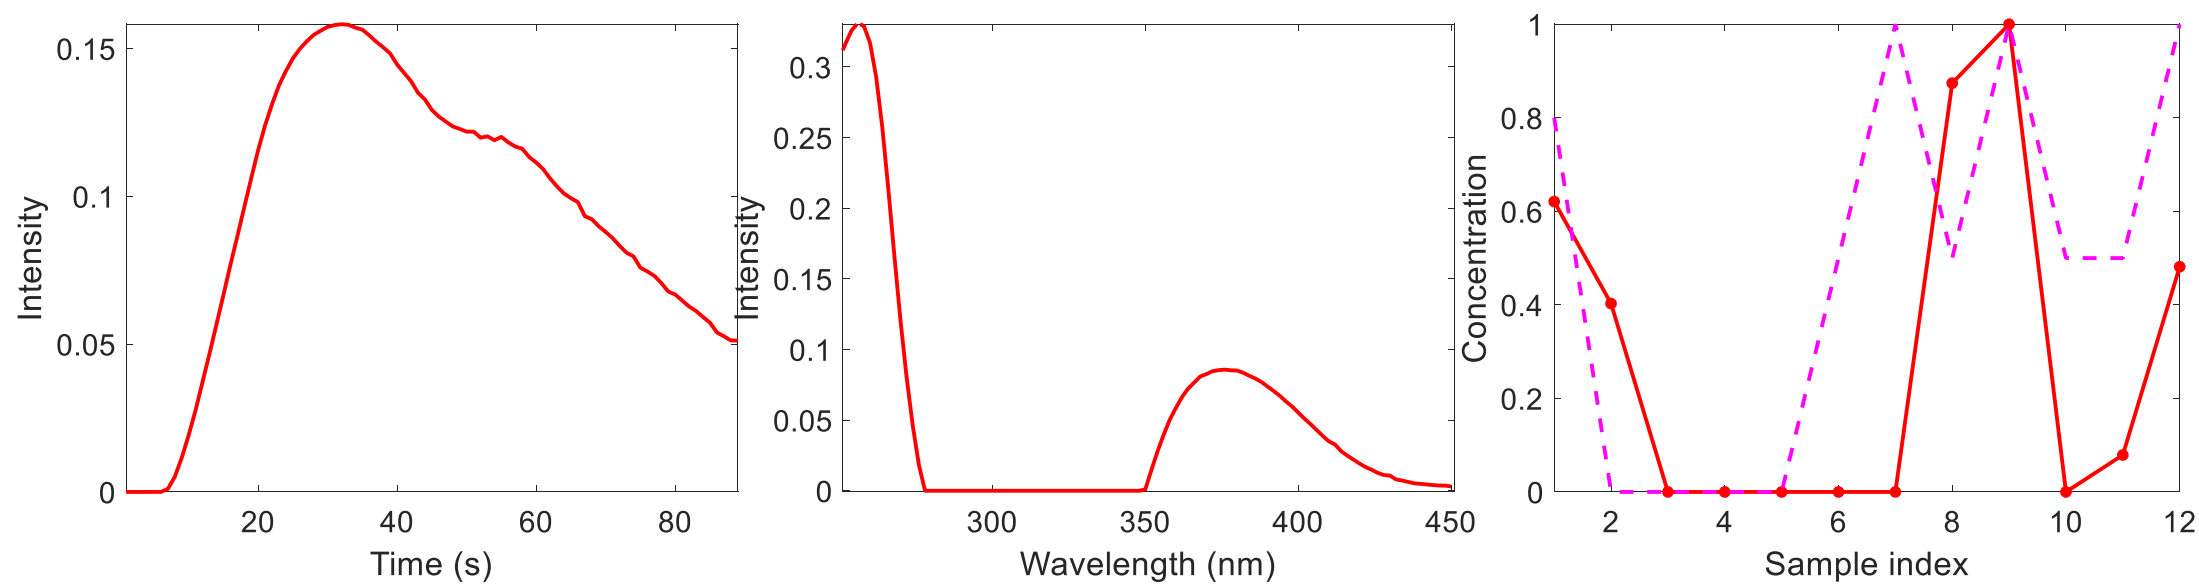

**3-HBA**

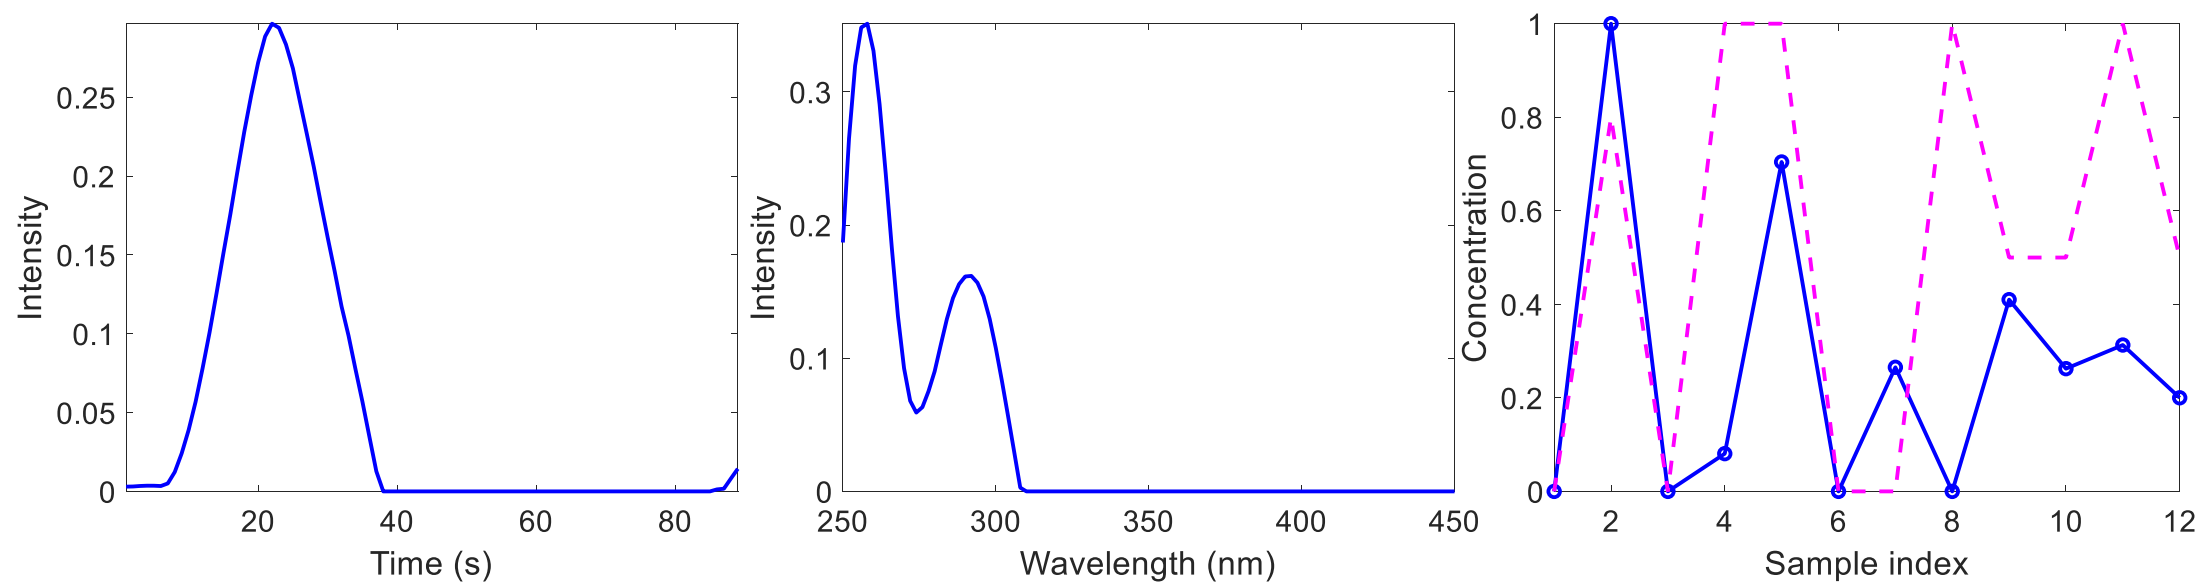

**4-HBA**

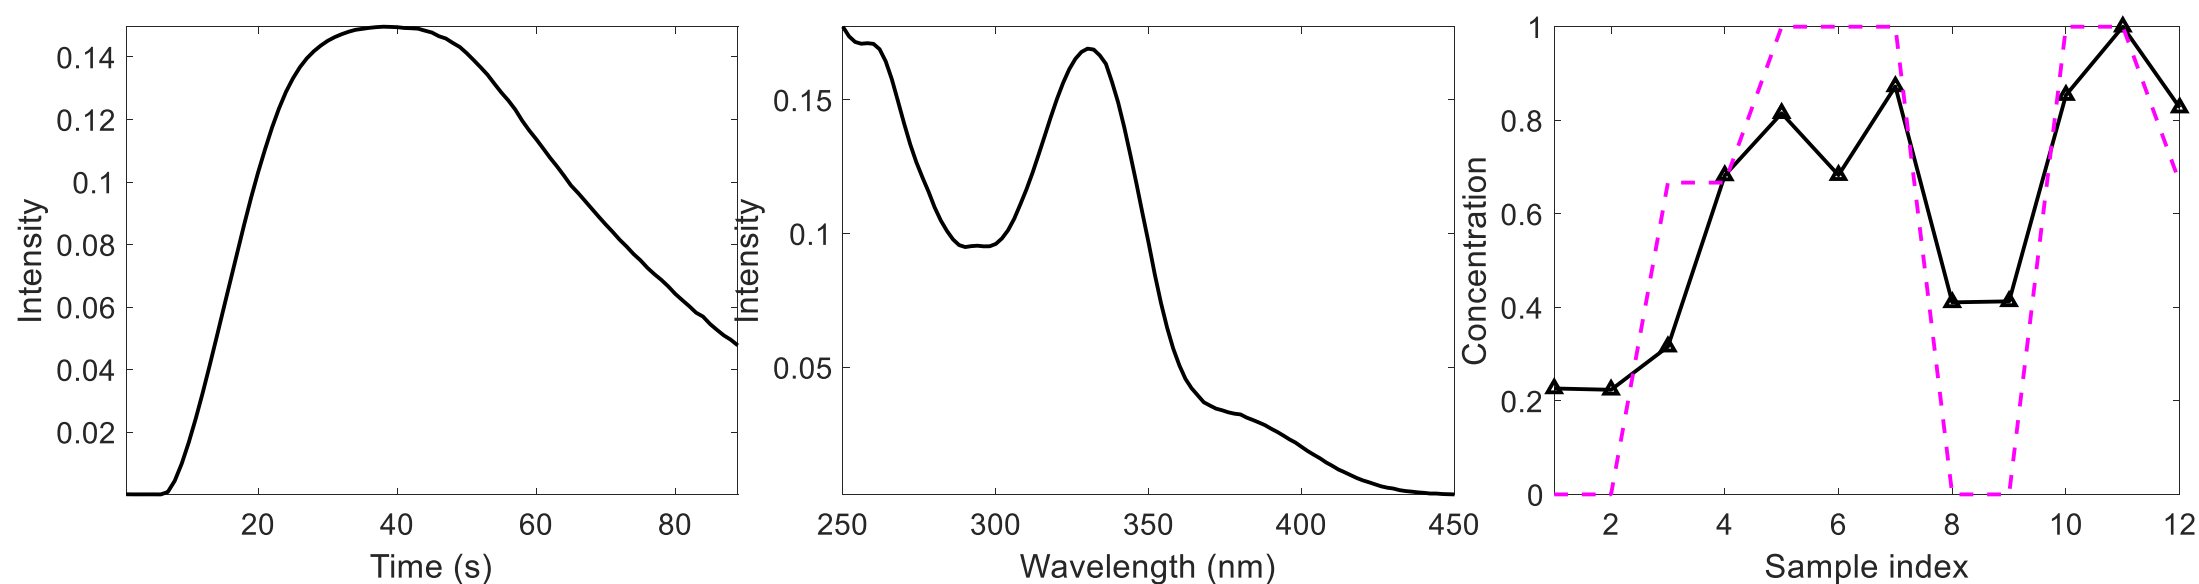

**Figure S17** FIA (left), spectra (middle), and sample (right) profiles using three components resolved in the analysis of the pH gradient FIA-UV dataset by **PARAFAC** of 2-HBA (red), 3-HBA (blue) and 4-HBA (black). Sample profiles were compared with reference ones (cyan). See results in section 4.3 and Table 3.

Figure S17

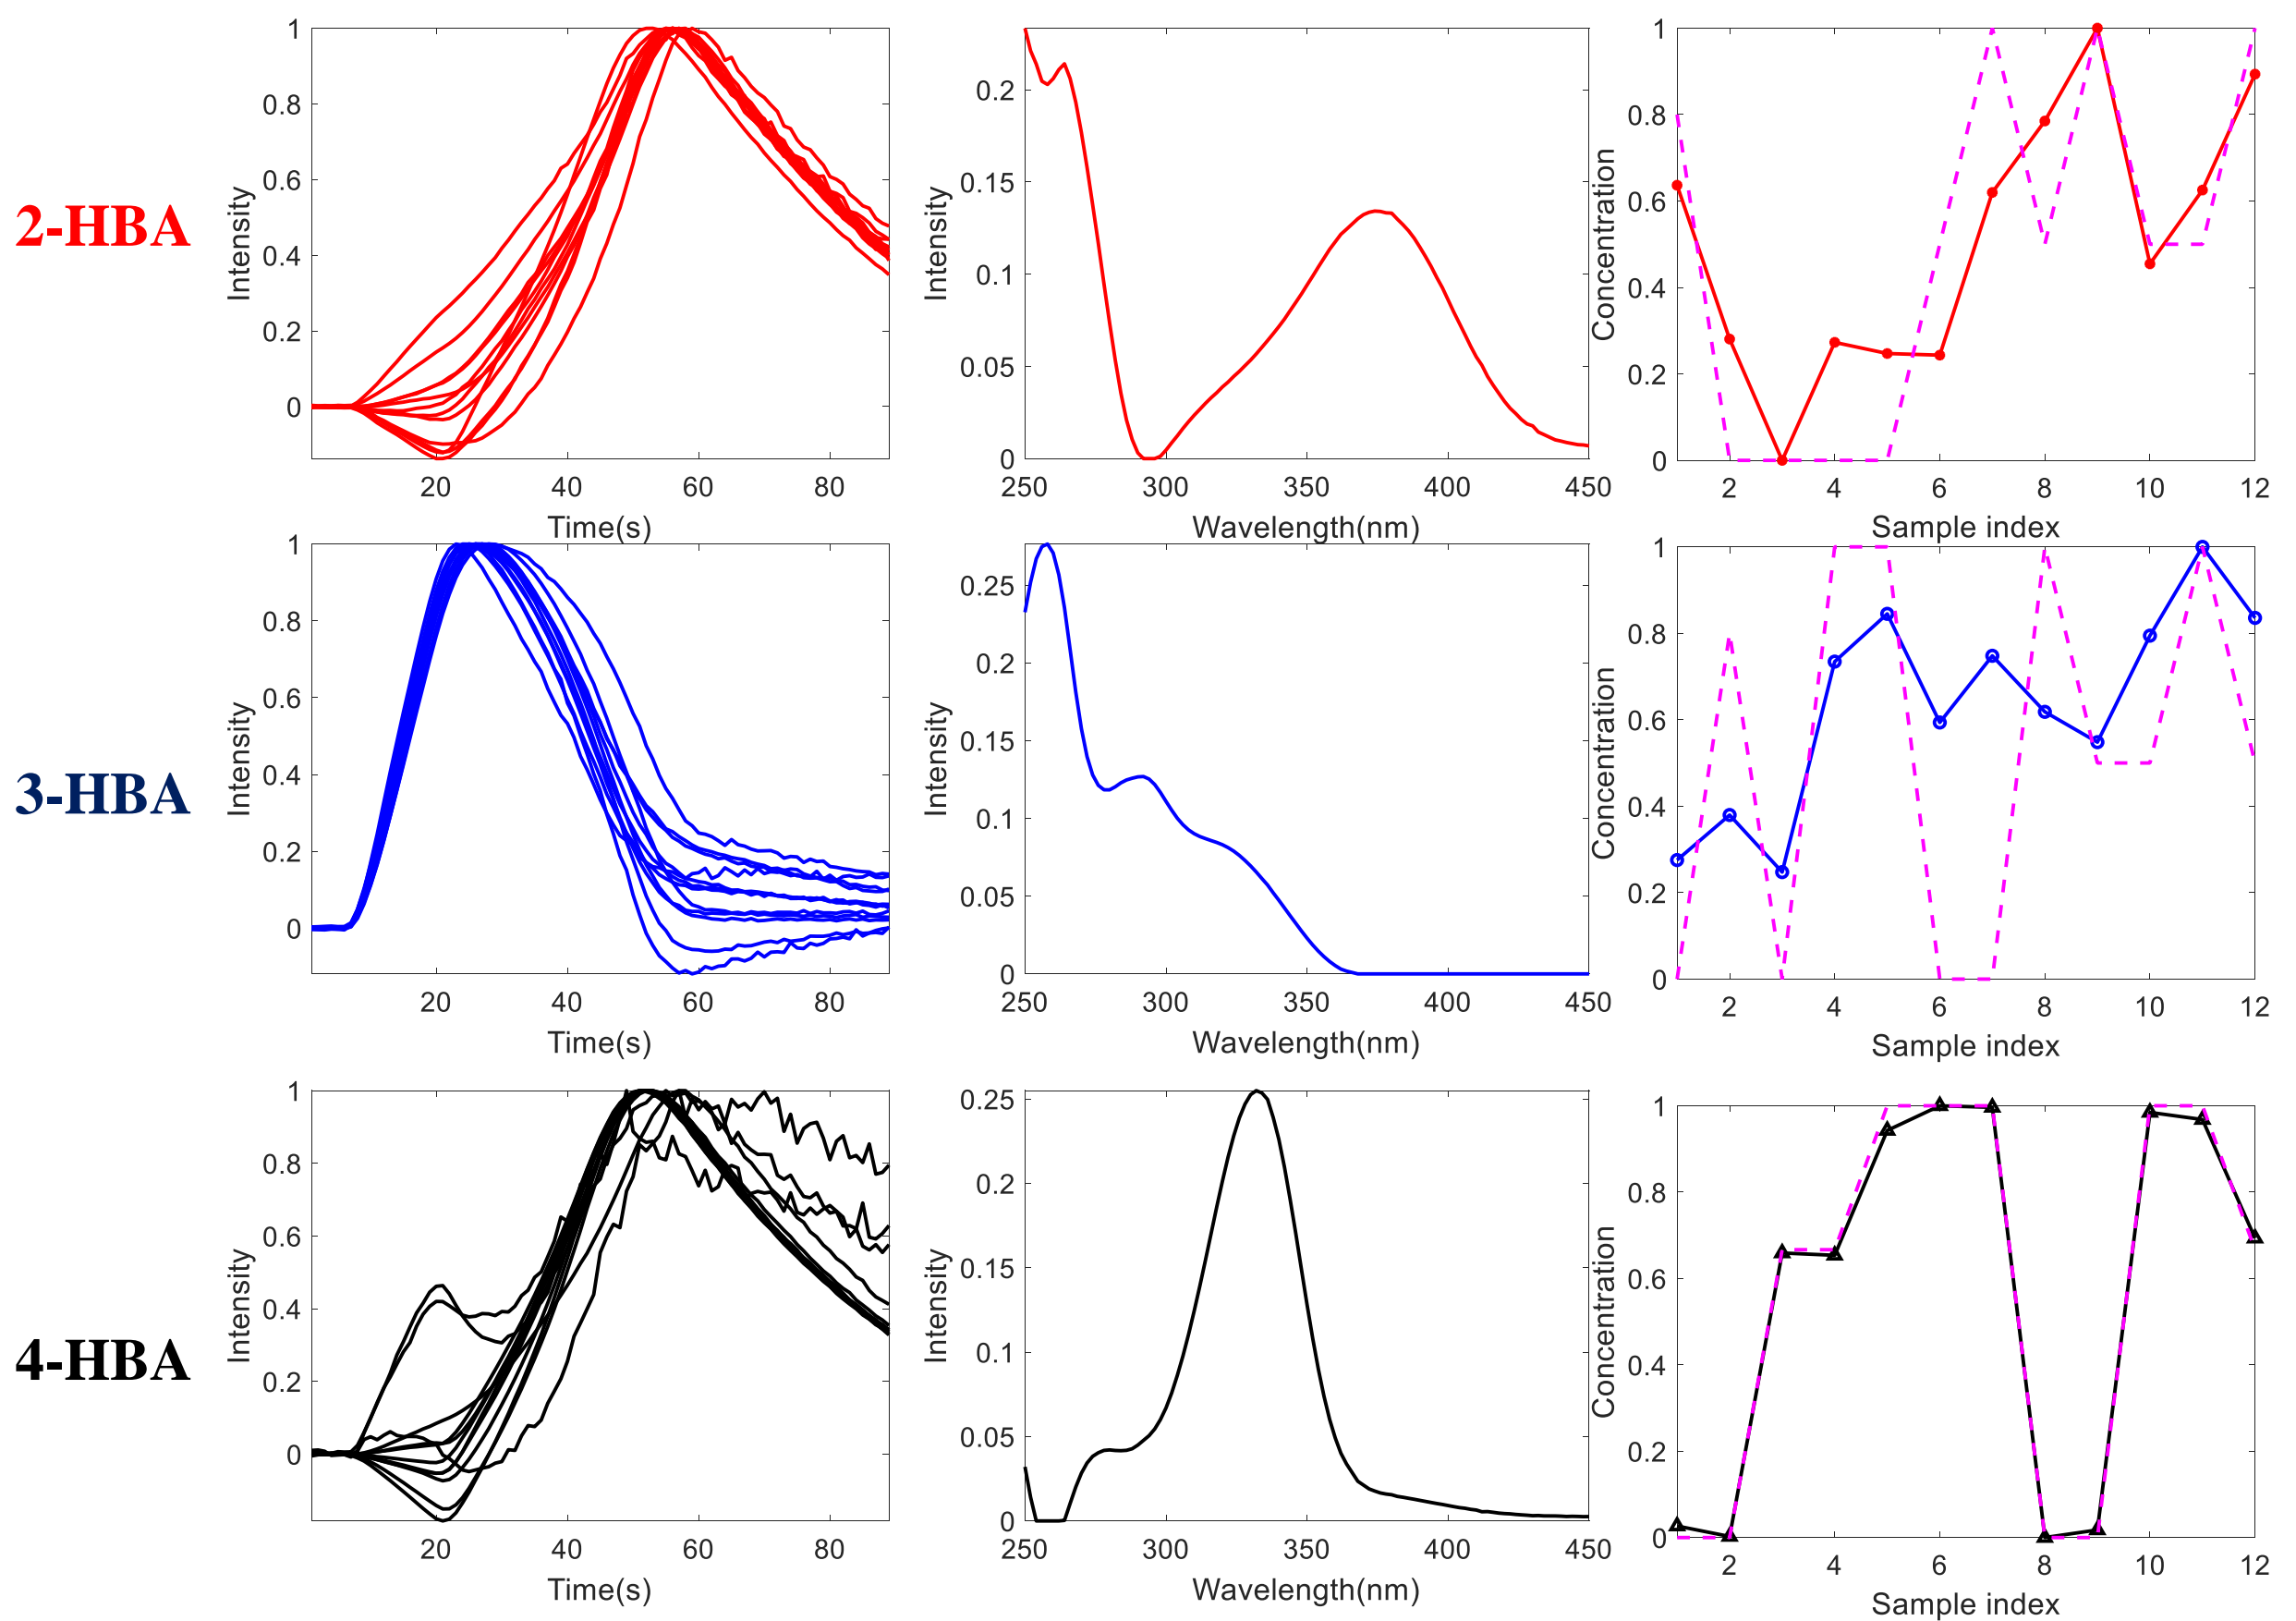

**Figure S18** FIA (left), spectra (middle), and sample (right) profiles using three components resolved in the analysis of the pH gradient FIA-UV dataset by **PARAFAC2** of 2-HBA (red), 3-HBA (blue) and 4-HBA (black). Sample profiles were compared with reference ones (cyan). See results in section 4.3 and Table 3.

Figure S18

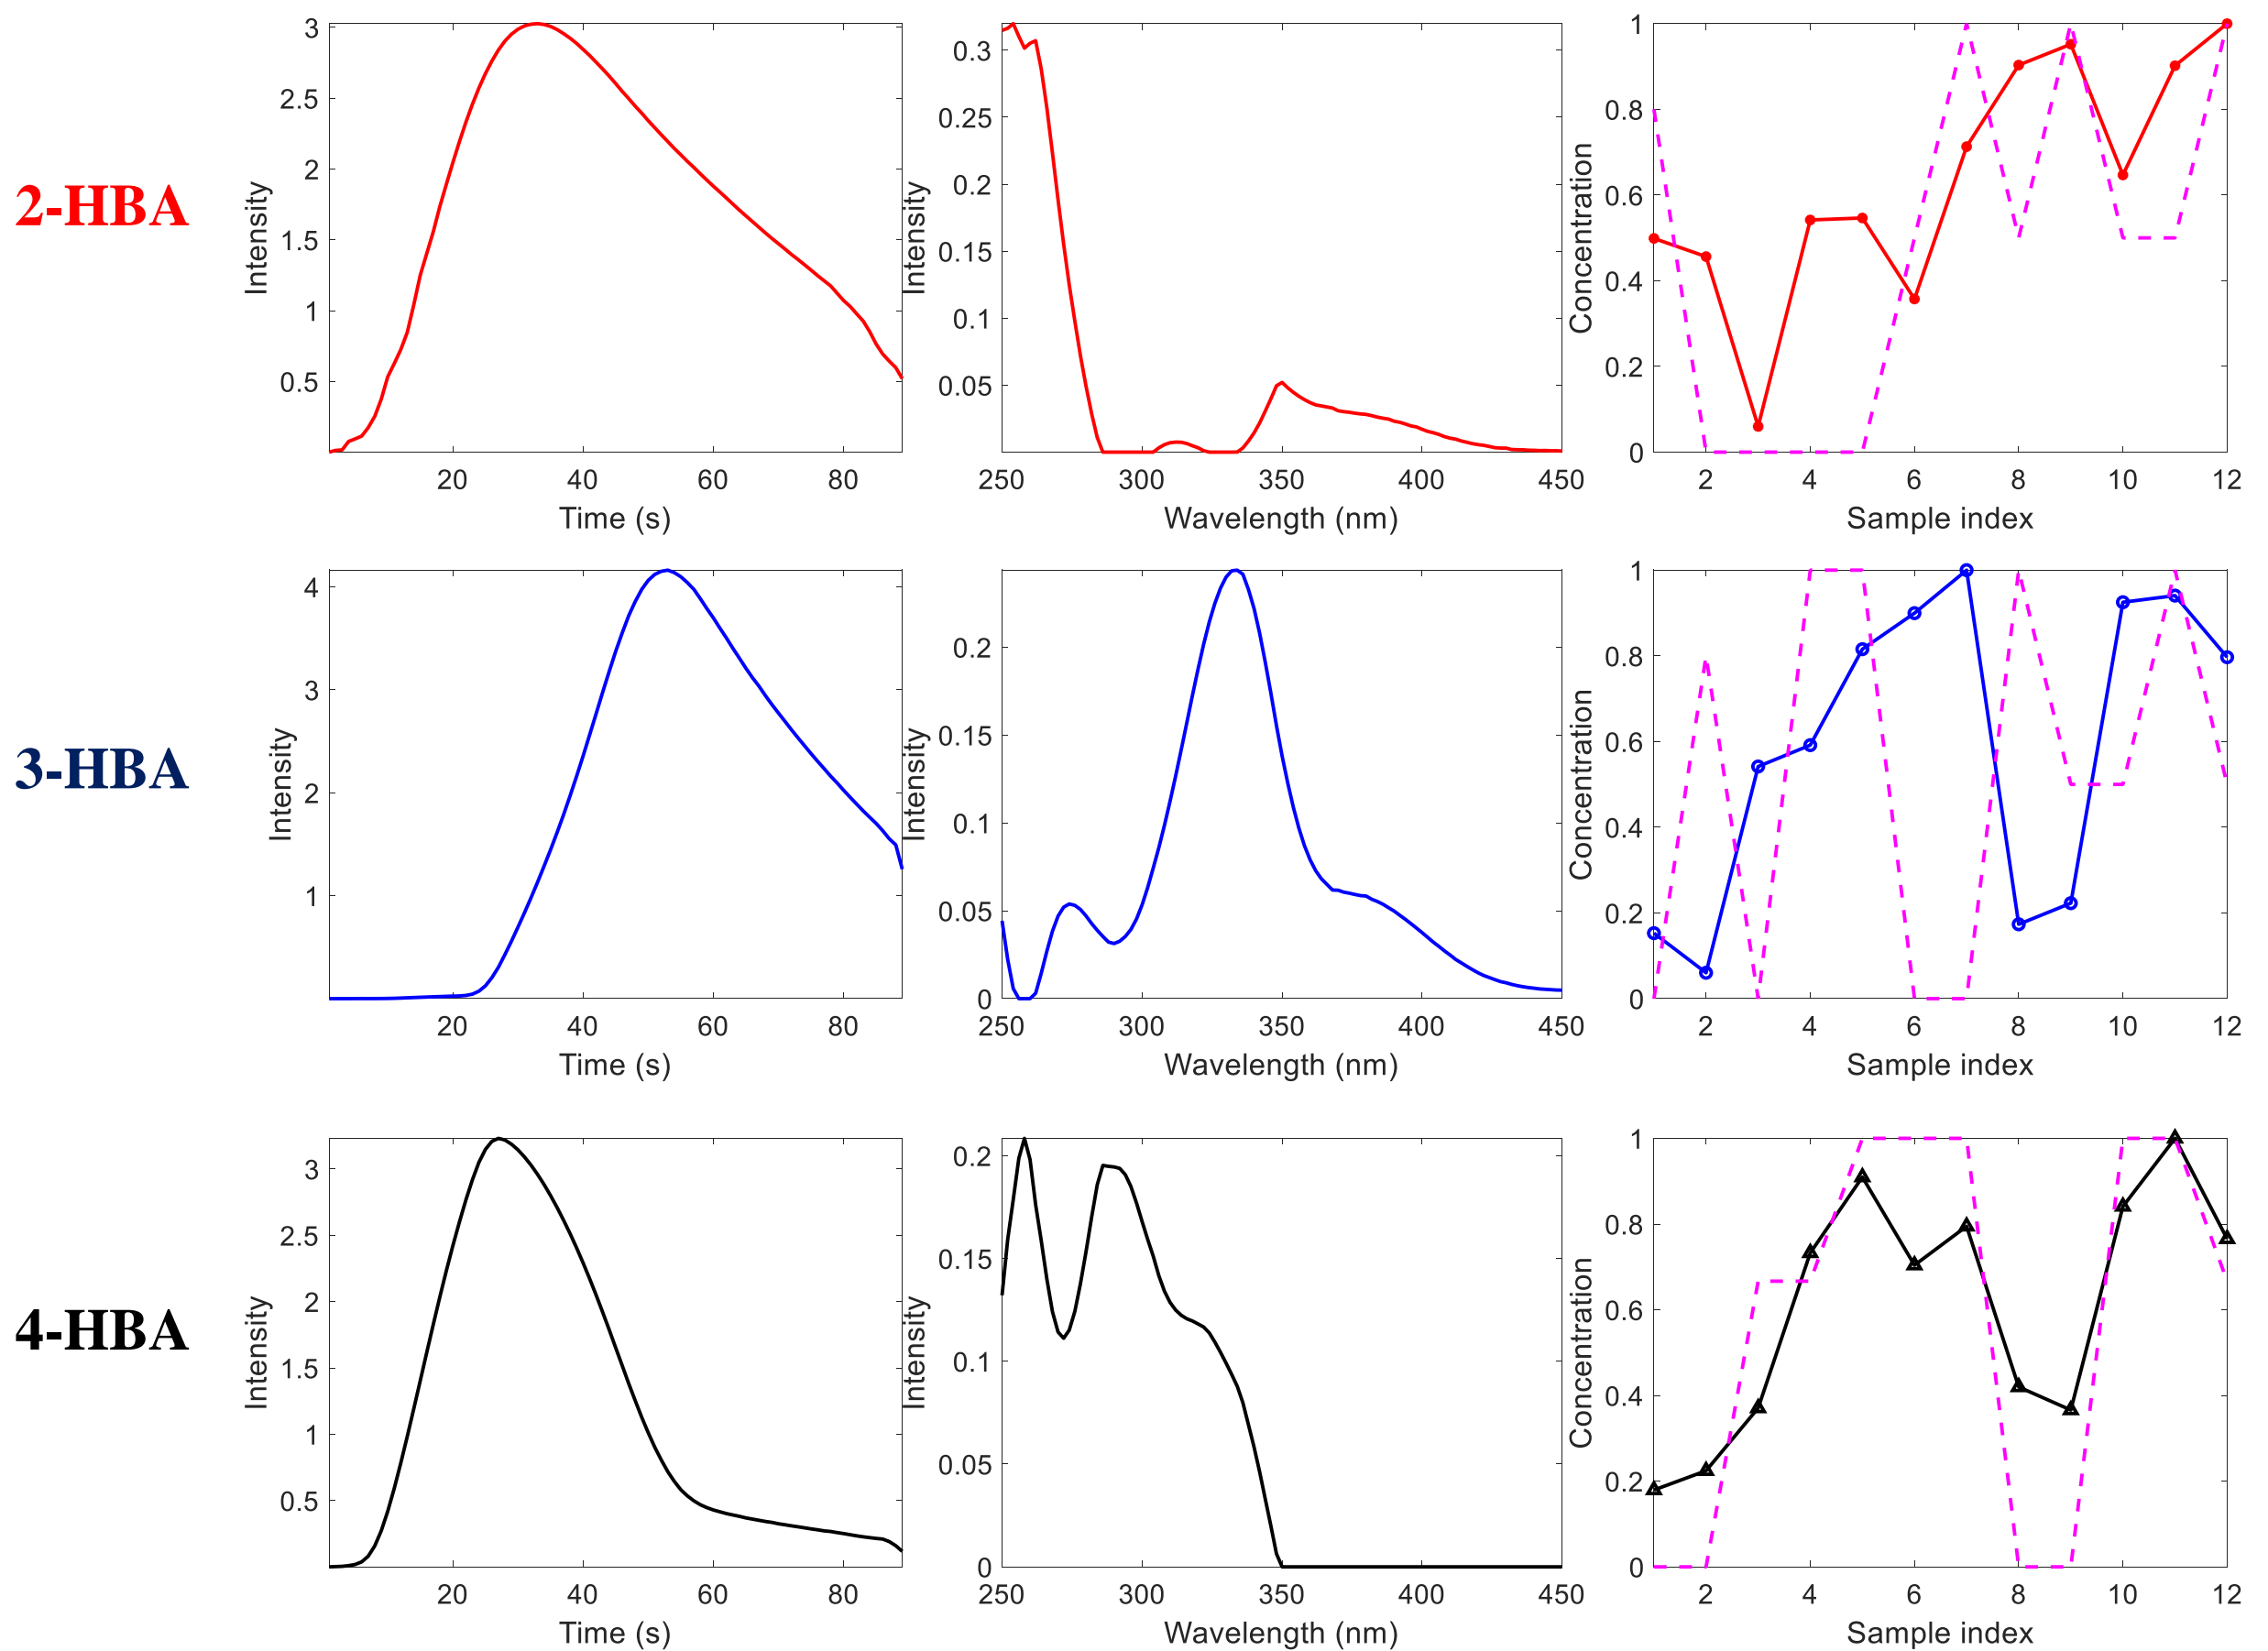

**Figure S19** FIA (left), spectra (middle), and sample (right) profiles using three components resolved in the analysis of the pH gradient FIA-UV dataset by **MCR-ALS trilinear (1,1,1)** of 2-HBA (red), 3-HBA (blue) and 4-HBA (black). Sample profiles were compared with reference ones (cyan). See results in section 4.3 and Table 3.

Figure S19



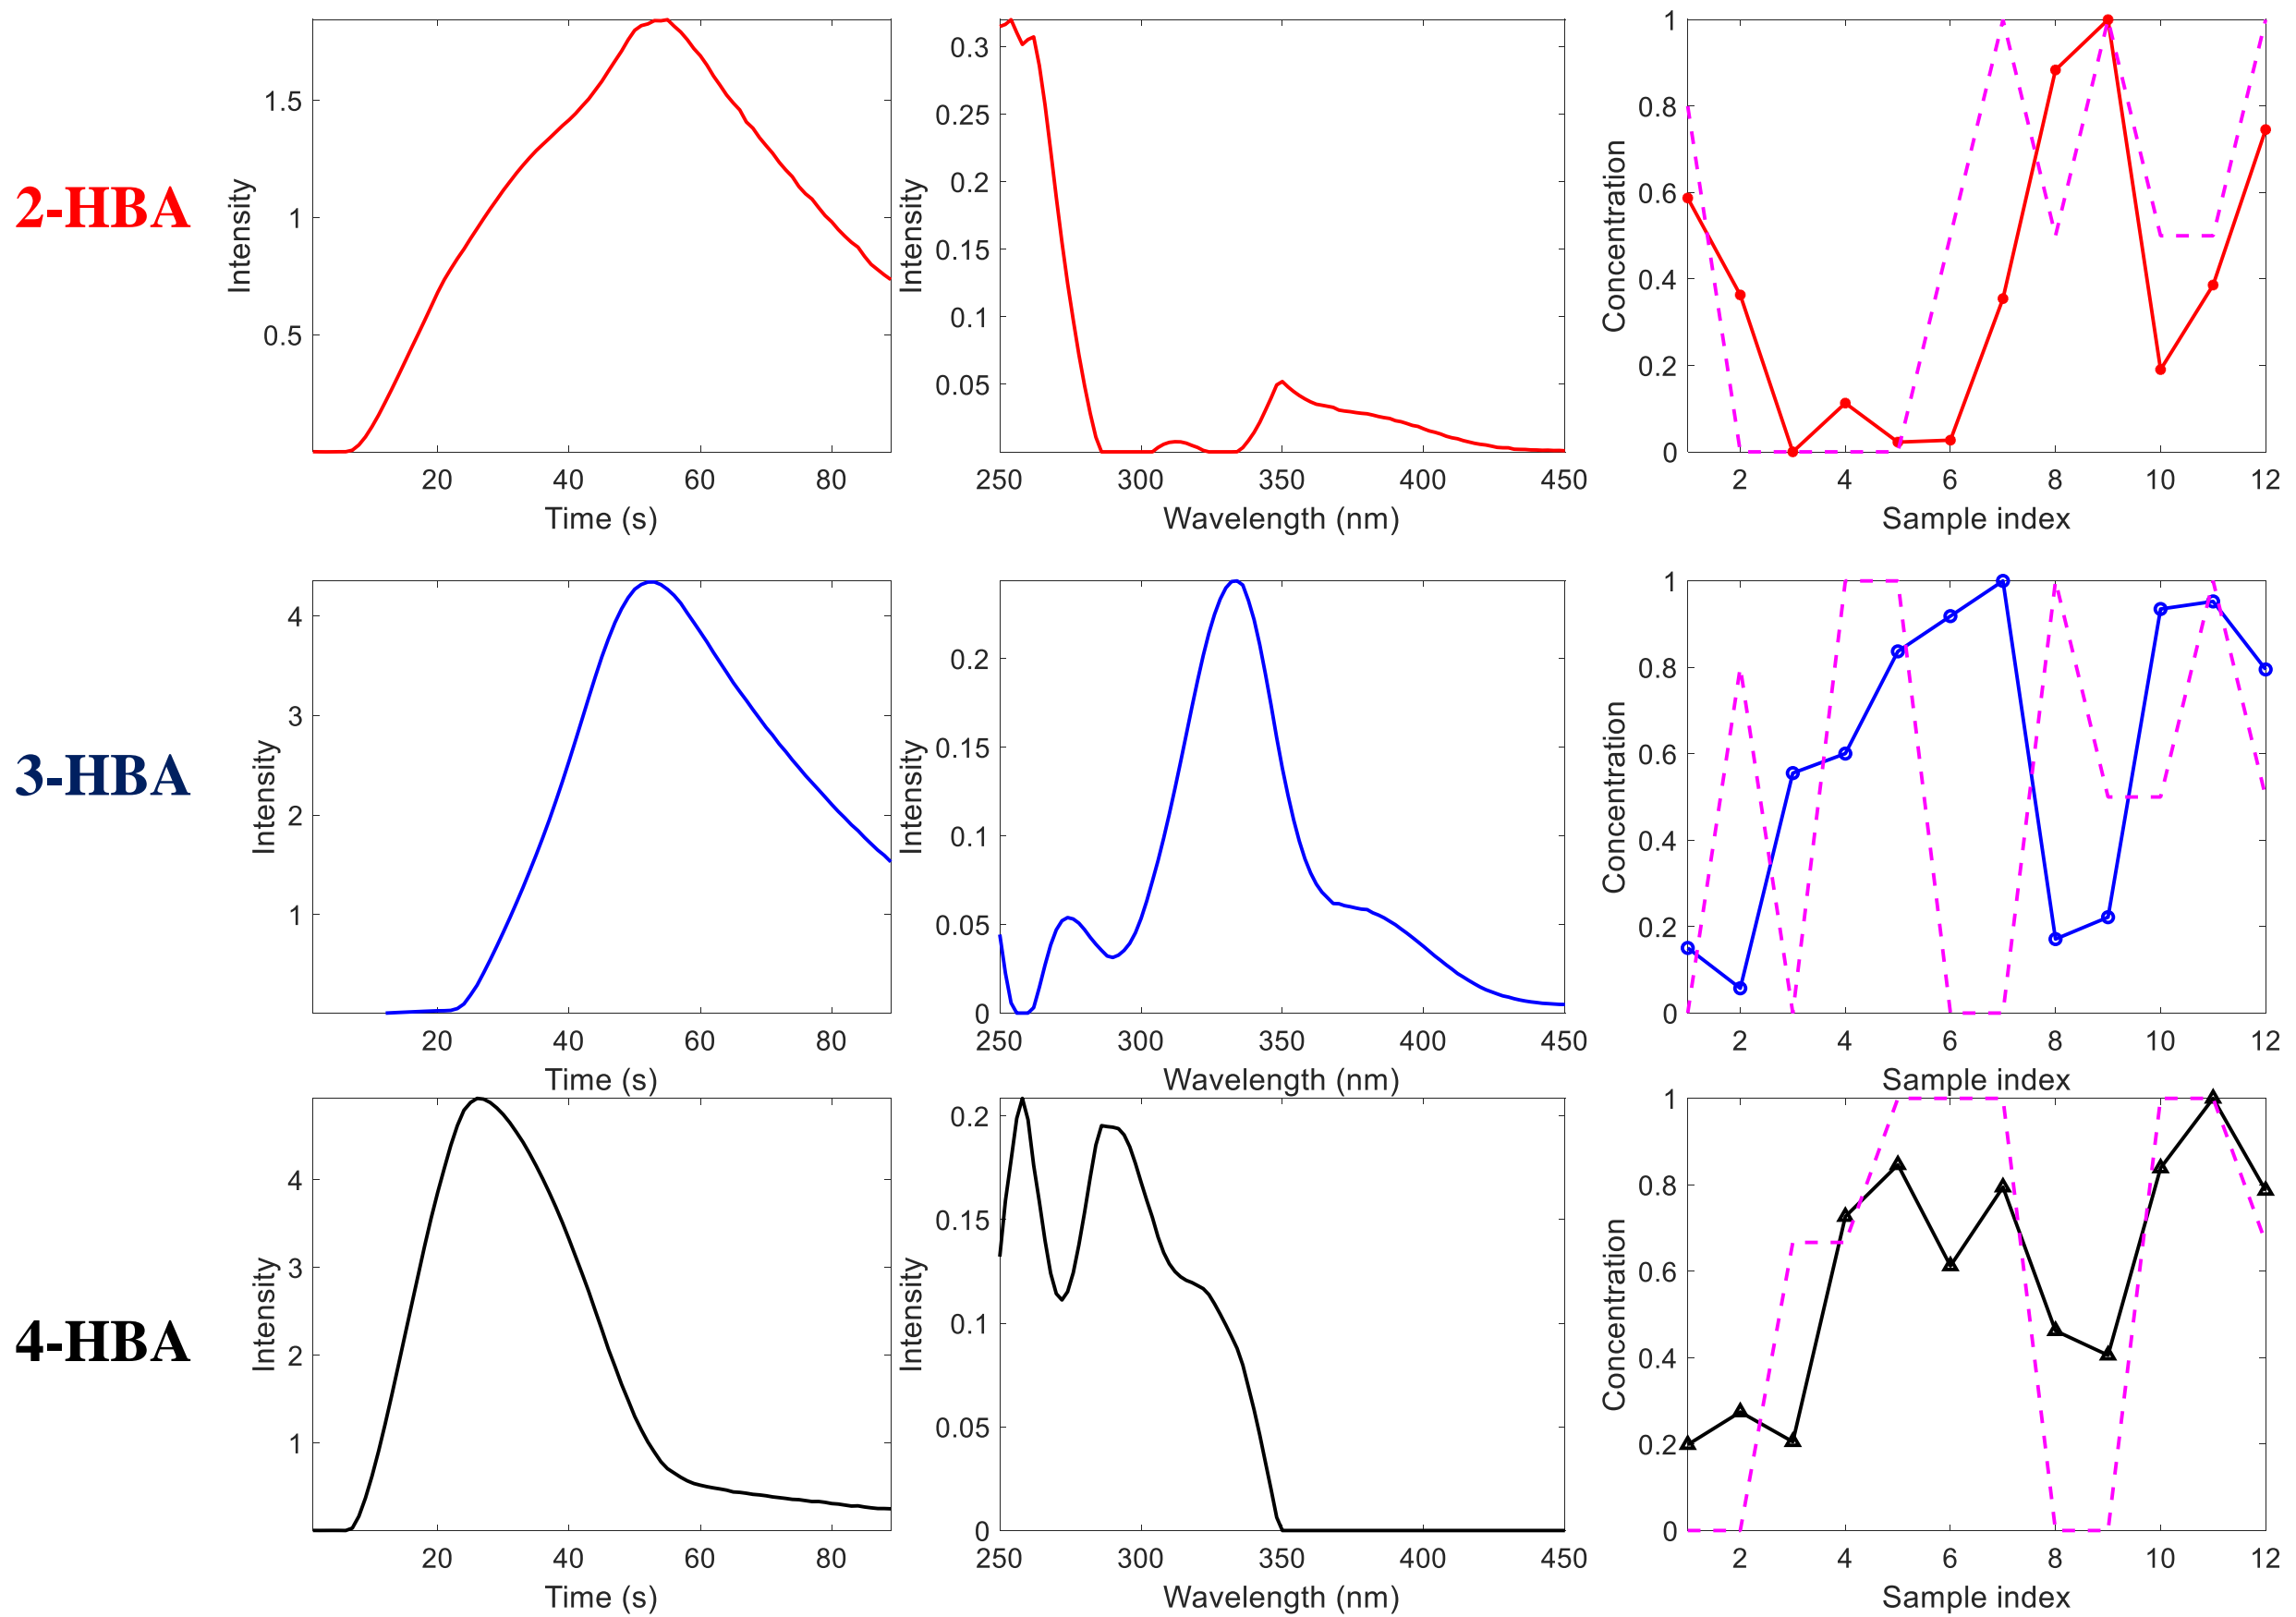

**Figure S20** FIA (left), spectra (middle), and sample (right) profiles using three components resolved in the analysis of the pH gradient FIA-UV dataset by **MCR-ALS trilinear (2,2,2)** of 2-HBA (red), 3-HBA (blue) and 4-HBA (black). Sample profiles were compared with reference ones (cyan). See results in section 4.3 and Table 3.

Figure S20

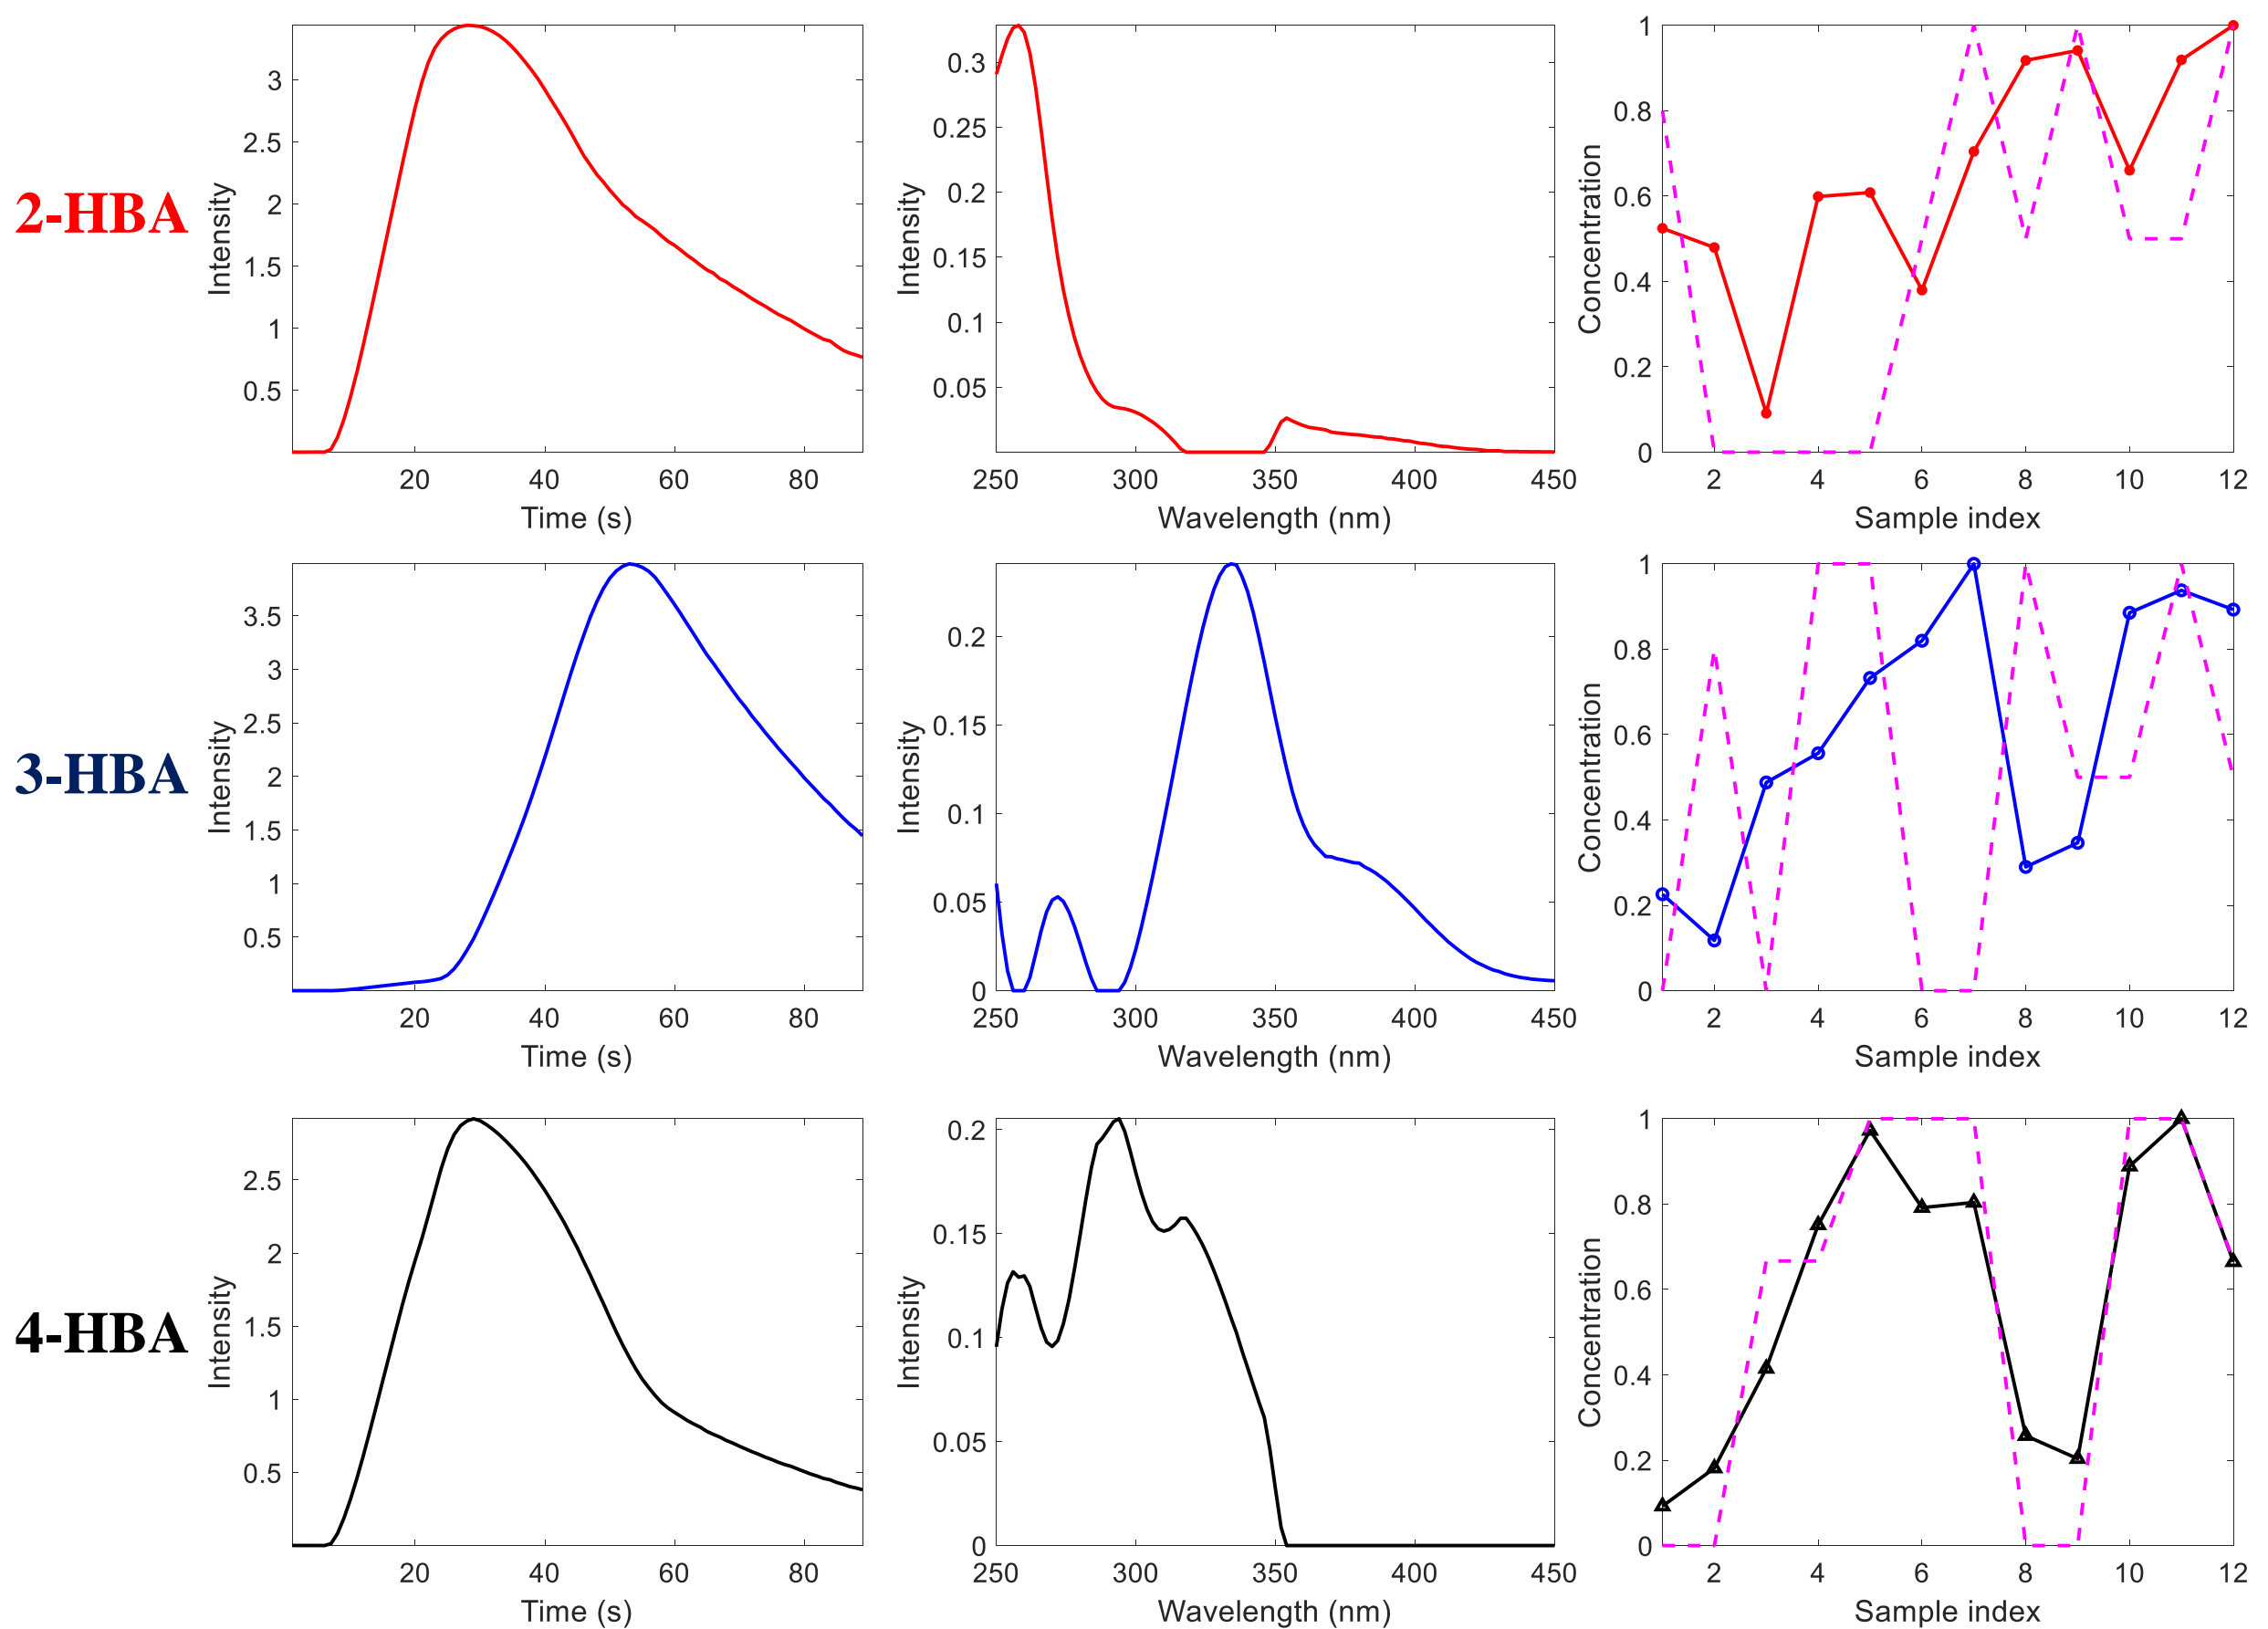

**Figure S21** FIA (left), spectra (middle), and sample (right) profiles using three components resolved in the analysis of the pH gradient FIA-UV dataset by **MCR-ALS bilinear (0,0,0)** of 2-HBA (red), 3-HBA (blue) and 4-HBA (black). Sample profiles were compared with reference ones (cyan). See results in section 4.3 and Table 3.

Figure S21
